# 1 Simulations reveal challenges to artificial community selection 2 and possible strategies for success

3 Li Xie\* , Alex E. Yuan, and Wenying Shou\*

4 Basic Sciences Division, Fred Hutchinson Cancer Research Center, Seattle, WA, 98109

## 5 Abstract

6 Multi-species microbial communities often display “community functions” arising from interactions of  
7 member species. Interactions are often difficult to decipher, making it challenging to design communities  
8 with desired functions. Alternatively, similar to artificial selection for individuals in agriculture and  
9 industry, one could repeatedly choose communities with the highest community functions to reproduce  
10 by randomly partitioning each into multiple “Newborn” communities for the next cycle. However, previous  
11 efforts in selecting complex communities have generated mixed outcomes that are difficult to interpret. To  
12 understand how to effectively enact community selection, we simulated community selection to improve  
13 a community function that requires two species and imposes a fitness cost on one or both species. Our  
14 simulations predict that improvement could be easily stalled unless various aspects of selection, including  
15 promoting species coexistence, suppressing non-contributors, adopting a “bet-hedging” strategy when  
16 choosing communities to reproduce, and reducing stochastic fluctuations in species biomass of Newborn  
17 communities, were carefully considered. When these considerations were addressed in experimentally  
18 feasible manners, community selection could overcome natural selection to improve community function,  
19 and may even force species to evolve growth restraint to achieve species coexistence. Our conclusions  
20 hold under various alternative model assumptions, and are thus applicable to a variety of communities.

## 21 Introduction

22 Multi-species microbial communities often display important *community functions*, defined as biochemical  
23 activities not achievable by member species in isolation. For example, a six-species microbial community,  
24 but not any member species alone, cleared relapsing *Clostridium difficile* infections in mice [1]. Com-  
25 munity functions arise from *interactions* where an individual alters the physiology of another individual.  
26 Thus, to improve community functions, one could identify and modify interactions [2, 3]. In reality, this  
27 is no trivial task: each species can release tens or more compounds, many of which may influence the  
28 partner species in diverse fashions [4, 5, 6, 7]. From this myriad of interactions, one would then need  
29 to identify those critical for community function, and modify them by altering species genotypes or the  
30 abiotic environment. One could also artificially assemble different combinations of species or genotypes

---

\*Authors of correspondence

31 at various ratios to screen for high community function (e.g. [8, 9]). However, some species may not be  
32 culturable in isolation, and the number of combinations becomes very large even for a moderate number  
33 of species and genotypes especially if various ratios were to be tested.

34 In an alternative approach, artificial selection of whole communities could be carried out over cycles to  
35 improve community function [10, 11, 12, 13, 14] (reviewed in [15, 16, 17]; Figure 1A ). A selection cycle  
36 starts with a collection of low-density “Newborn” communities with artificially-imposed boundaries (e.g.  
37 inside culture tubes). These low-density communities are incubated for a period of time (“maturation”)  
38 to form “Adult” communities. During maturation, community members multiply and interact with each  
39 other and possibly mutate, and the community function of interest (purple shade) develops. At the end  
40 of maturation, desired Adult communities (e.g. darkest purple shade) are chosen to “reproduce” where  
41 each is randomly partitioned into multiple Newborn communities to start the next cycle. Superficially,  
42 this process may seem straightforward since “one gets what one selects for”. After all, artificial selection  
43 on individuals has been successfully implemented to obtain, for example, proteins of enhanced activities  
44 ([18, 19, 20]; Figure S1). However, compared to artificial selection of individuals or mono-species groups,  
45 artificial selection of multi-species communities is more challenging (see detailed explanation in Figure  
46 S1). For example, member species critical for community function may get lost during selection cycles.

47 The few attempts at community selection have generated interesting results. One theoretical study  
48 simulated artificial selection on multi-species communities based on the presence or absence of a member  
49 species [21]. Communities responded to selection, but only under certain conditions. In another theo-  
50 retical study, multi-species communities responded to artificial selection based on their ability to modify  
51 their abiotic environment in user-defined fashions [12]. In both cases, the response to selection quickly  
52 leveled off, and could be generated without mutations. Thus, community selection acted entirely on  
53 species types instead of new genotypes [21, 12]. In experiments, complex microbial communities were  
54 selected for various traits [10, 11, 13, 14]. For example, microbial communities selected to promote  
55 early or late flowering in plants were dominated by distinct species types [13]. However in other cases, a  
56 community trait may fail to improve despite selection, and may improve even without selection [10, 11].

57 Because communities used in these selection attempts were complex, much remains unknown. First,  
58 was the trait under selection a community function or achievable by a single species? If the latter, then  
59 community selection may not be needed, and the simpler task of selecting individuals or mono-species  
60 groups could be performed instead (Figure S1). Second, did selection act solely on species types or  
61 also on newly-arising genotypes? If selection acted solely on species types ([21, 12, 13]), then without  
62 immigration of new species to generate new variations, community function may quickly plateau [21, 12].  
63 If selection acted on genotypes, then community function could continue to improve as new genotypes  
64 evolve. Finally, why might a community trait sometimes fail to improve despite selection [10, 11]?

65 In this study, we simulated artificial selection on communities with two defined species whose phe-  
66 notypes can be modified by random mutations. Our goal is to improve a “costly” community function.  
67 A community function is costly if any community member’s fitness is reduced by contributing to that  
68 community function (Figure 1B). Costly community functions are particularly challenging to improve:  
69 since contributors to community function grow slower than non-contributors, non-contributors will take  
70 over during community maturation. If all Adult communities are dominated by non-contributors, then  
71 community selection will fail. To improve a costly community function, inter-community selection during  
72 community reproduction (which occurs infrequently once every cycle) must overcome intra-community  
73 selection throughout community maturation (Figure 1B).

74 By simulating a simplified two-species community, we could compare the efficacy of different selection  
75 regimens with relative ease, and begin to mechanistically understand evolutionary dynamics during com-  
76 munity selection. We also designed our simulations to mimic real lab experiments so that our conclusions  
77 could guide future experiments. For example, our simulations incorporated not only chemical mechanisms

78 of species interactions (as advocated by [22, 23]), but also experimental procedures (e.g. pipetting cul-  
79 tures during community reproduction). Model parameters, including species phenotypes, mutation rate,  
80 and distribution of mutation effects, were based on a wide variety of published experiments. Note that  
81 most previous models focused on binary genotypes (e.g. contributing or not contributing to community  
82 function), and therefore could not model community function improvement driven by the evolution of  
83 quantitative phenotypes. We show that artificial community selection can improve a costly community  
84 function, but only after circumventing a multitude of failure traps.

## 85 Results

86 We will first introduce the subject of our community selection simulation: a commensal two-species  
87 community that converts substrates to a valued product. We will then define community function, and  
88 describe how we simulate artificial community selection. Using simulation results, we will demonstrate  
89 critical measures that make community selection effective, including promoting species coexistence,  
90 suppressing non-contributors, adopting a “bet-hedging” strategy when choosing Adult communities to  
91 reproduce, and being mindful about how routine experimental procedures can impede selection. Finally,  
92 we show that our conclusions are robust under alternative model assumptions, applicable to mutualistic  
93 communities and communities whose member species may not coexist. To avoid confusion, we will use  
94 “community selection” or “selection” to describe the entire process of artificial community selection (com-  
95 munity formation, growth, selection, and reproduction), and use “choose” or “inter-community selection”  
96 to refer to the selection step where the experimentalist decides which communities will reproduce.

### 97 **A Helper-Manufacturer community that converts substrates into** 98 **a product**

99 Motivated by previous successes in engineering two-species microbial communities that convert substrates  
100 into useful products [24, 25, 26], we numerically simulated selection of such communities.

101 In our community, Manufacturer M can manufacture Product P of value to us (e.g. a bio-fuel or  
102 a drug) at a fitness cost to self, but only if assisted by Helper H (Figure 1C). Specifically, Helper but  
103 not Manufacturer can digest an agricultural waste (e.g. cellulose), and as Helper grows biomass, Helper  
104 releases Byproduct B at no fitness cost to itself. Manufacturer requires H’s Byproduct (e.g. carbon  
105 source) to grow. In addition, Manufacturer invests  $f_P$  ( $0 \leq f_P \leq 1$ ) fraction of its potential growth to  
106 make Product P while using the rest ( $1 - f_P$ ) for its biomass growth. Both species also require a shared  
107 Resource R (e.g. nitrogen). Thus, the two species together, but not any species alone, can convert  
108 substrates (agricultural waste and Resource) into Product.

109 We define community function as the total amount of Product accumulated as a low-density Newborn  
110 community grows into an Adult community over maturation time  $T$ , i.e.  $P(T)$ . In Discussions, we explain  
111 problems associated with an alternative definition of community function (e.g. per capita production;  
112 Methods Section 7; Figure S2). We will initially focus on the scenario where community function is not  
113 costly to Helpers, but incurs a fitness cost of  $f_P$  to M. Later, we will show that our conclusions also  
114 hold when community function is costly to both H and M. Below, we will describe how we simulated  
115 community selection, followed by how we chose parameters of species phenotypes and parameters of  
116 selection regimen.

## 117 Simulating community selection

118 We simulated four stages of community selection (Figure 1D): (i) forming Newborn communities; (ii)  
119 Newborn communities maturing into Adult communities; (iii) choosing high-functioning Adult com-  
120 munities, and (iv) reproducing the chosen Adult communities by splitting each into multiple Newborn  
121 communities of the next cycle. Our simulation was individual-based. That is, it tracked phenotypes and  
122 biomass of individual H and M cells in each community as cells grew, divided, mutated, or died. Our  
123 simulations also tracked dynamics of chemicals (including Product) in each community, and accounted  
124 for actual experimental steps such as pipetting cultures during community reproduction. Below is a brief  
125 summary of our simulations, with more details in Methods (Section 6).

126 Each simulation started with  $n_{tot}$  number of Newborn communities. Each Newborn community always  
127 started with a fixed amount of Resource  $R(0)$  and a total biomass close to a target value  $BM_{target}$  (see  
128 Discussions for problems associated with not having a biomass target, such as diluting an Adult by a  
129 fixed fold into Newborns). Agricultural waste was always supplied in excess and thus did not enter our  
130 equations. Note that except for the first cycle, the relative abundance of species in a Newborn community  
131 was approximately that of its parent Adult community.

132 During community maturation, biomass of individual cells grew. The biomass growth rate of an H cell  
133 depended on Resource concentration (Monod equation; Figure S3A; Eq. 23). As H grew, it consumed  
134 Resource and simultaneously released Byproduct (Eqs. 21 and 22). The potential growth rate of an  
135 M cell depended on the concentrations of Resource and H's Byproduct (Mankad-Bungay dual-nutrient  
136 equation [27]; Figure S3B; see experimental support in Figure S4). M cell's actual biomass growth  
137 rate was  $(1 - f_P)$  fraction of M's potential growth rate (Eq. 24). As M grew, it consumed Resource  
138 and Byproduct (Eqs. 21 and 22), and released Product at a rate proportional to  $f_P$  and M's potential  
139 growth rate (Eqs. 8). Once an H or M cell's biomass grew from 1 to 2, it divided into two cells of  
140 equal biomass with identical phenotypes, thus capturing experimental observations of continuous biomass  
141 increase (Figure S5) and discrete cell division events [28]. Meanwhile, H and M cells died stochastically  
142 at a constant death rate. Although mutations can occur during any stage of the cell cycle, we assigned  
143 mutations immediately after cell division, where each phenotype of both cells mutated independently.

144 Mutable phenotypes included H and M's maximal growth rates and affinities for nutrients ("growth  
145 parameters"), and M's  $f_P$  (the fraction of potential growth diverted for making Product), since these  
146 phenotypes have been observed to rapidly change during evolution ([29, 30, 31, 32]). Mutated phenotypes  
147 could range between 0 and their respective evolutionary upper bounds. Among mutations that alter  
148 phenotypes (denoted "mutations"), on average, half abolished the function (e.g. zero growth rate, zero  
149 affinity, or  $f_P = 0$ ) based on experiments on GFP, viruses, and yeast [33, 34, 35]. Effects of the other  
150 50% mutations were bilateral-exponentially distributed, enhancing or diminishing a phenotype by a few  
151 percent, based on our re-analysis of published yeast data sets [36] (Figure S6). We held death rates  
152 constant, since death rates were much smaller than growth rates and thus mutations in death rates  
153 would be inconsequential. We also held release and consumption coefficients constant. This is because,  
154 for example, the amount of Byproduct released per H biomass generated is constrained by biochemical  
155 stoichiometry.

156 At the end of community maturation time  $T$ , we compared community function  $P(T)$  (the total  
157 amount of Product accumulated in the community by time  $T$ ) for each Adult community, and chose  
158 high-functioning Adults to reproduce. Each chosen Adult was randomly partitioned into Newborns with  
159 target total biomass  $BM_{target}$ . For example, if the chosen Adult had a total biomass of  $60BM_{target}$ , then  
160 each cell would be assigned a random integer from 1 to 60, and those cells with the same random integer  
161 would be allocated to the same Newborn. Experimentally, this is equivalent to volumetric dilution using  
162 a pipette. Thus, for each Newborn, the total biomass and species ratio fluctuated around their expected

163 values in a fashion associated with pipetting (Methods Section 9). In the “top-dog” strategy, we always  
164 chose the highest-functioning Adult available to us: after the highest-functioning Adult was used up for  
165 making Newborns, we then reproduced the next highest-functioning Adult in the same way and randomly  
166 chose enough Newborns so that a total of  $n_{tot}$  Newborns were generated for the next selection cycle.

## 167 **Choosing species: enhancing species coexistence**

168 In order to improve community function through community selection, species need to coexist throughout  
169 selection cycles. That is, all species must grow at a similar average growth rate within each cycle. Fur-  
170 thermore, species ratio should not be extreme because otherwise, the low-abundance species could be lost  
171 by chance during Newborn formation. Species coexistence at a moderate ratio has been experimentally  
172 realized in engineered communities [24, 25, 37, 38].

173 To achieve species coexistence at a moderate ratio in the H-M community, three considerations need  
174 to be made. First, the fraction of growth M diverted for making Product ( $f_P$ ) must not be too large,  
175 otherwise M would always grow slower than H and thus eventually go extinct (Figure 2A, top). Second,  
176 H and M's growth parameters (maximal growth rates in excess nutrients; affinities for nutrients) must  
177 be balanced. This is because upon Newborn formation, H can immediately start to grow on agricultural  
178 waste and Resource, while M cannot grow until H's Byproduct has accumulated to a sufficiently high level.  
179 Thus to achieve coexistence, M must grow faster than H at some point during community maturation.  
180 Third, to achieve a moderate steady-state species ratio, metabolite release and consumption need to be  
181 balanced [37]. Otherwise, the ratio between metabolite releaser and consumer can be extreme.

182 Based on these considerations and published yeast and *E. coli* measurements, we chose H and  
183 M's ancestral growth parameters and their evolutionary upper bounds, as well as release, consumption,  
184 and death parameters (Table 1, Methods Section 2). This ensured that throughout evolution, different  
185 species ratios would converge toward a moderate steady state value during community maturation (Figure  
186 2A, bottom). Note that if species were not chosen properly, selection might fail due to insufficient  
187 species coexistence (Figure 6A), although we will demonstrate that under effective community selection,  
188 requirements on species coexistence could be relaxed (Figure 6B and C).

## 189 **Choosing selection regimen parameters: avoiding known failure** 190 **modes**

191 After choosing member species with appropriate phenotypes, we need to consider the parameters of our  
192 selection regimen (Figure 1D). These parameters include the total number of communities under selection  
193 ( $n_{tot}$ ), the number of Adult communities chosen to reproduce ( $n_{chosen}$ ), Newborn target total biomass  
194 ( $BM_{target}$ ) which indicates the “bottleneck size” when splitting an Adult community into Newborn  
195 communities, the amount of Resource added to each Newborn ( $R(0)$ ), the amount of mutagenesis  
196 which controls the rate of phenotype-altering mutations ( $\mu$ ), and maturation time ( $T$ ). Compared to  
197 the well-studied problem of group selection where the unit of selection is a mono-species group [39, 40,  
198 41, 42, 43, 44, 45, 46, 47, 48, 49, 50, 51, 52, 53], community selection is more challenging (Discussions;  
199 Figure S1). However, the two types of selections do share some common aspects (Discussions; Figure  
200 S1). Thus, we can apply group selection theory, together with other practical considerations, to better  
201 design community selection regimen.

202 If the total number of communities  $n_{tot}$  is very large, then the chosen community will likely display  
203 a higher community function than if  $n_{tot}$  is small, but experimentally achieving a large  $n_{tot}$  is more

204 challenging. We chose a total of 100 communities ( $n_{tot}=100$ ).  
205  $n_{chosen}$ , the number of Adults chosen by the experimentalist to reproduce, reflects selection strength.  
206 Since the top-functioning Adult is presumably the most desirable, we reproduced it into as many Newborns  
207 as possible, and then reproduced the second best etc until we obtained  $n_{tot}$  Newborn communities for the  
208 next cycle (the “top-dog” strategy). Later, we will compare the “top-dog” strategy with other strategies  
209 employing weaker selection strengths.

210 If the mutation rate is very low, then community function cannot rapidly improve. If the mutation  
211 rate is very high, then non-contributors will be generated at a high rate, and as the fast-growing non-  
212 contributors take over during community maturation, community function will likely collapse. Here,  
213 we chose  $\mu$ , the rate of phenotype-altering mutations, to be biologically realistic (0.002 per cell per  
214 generation per phenotype, which is lower than the highest values observed experimentally; Methods  
215 Section 4).

216 If Newborn target total biomass  $BM_{target}$  is very large, or if the number of doublings within maturation  
217 time  $T$  is very large, then non-contributors will take over in all communities during maturation (Figure  
218 S7, compare B-D with A), as predicted by group selection theory. On the other hand, if both  $BM_{target}$   
219 and the number of generations within  $T$  are very small, then mutations will be rare within each cycle,  
220 and many cycles will be required to improve community function. Finally, if  $BM_{target}$  is very small, then  
221 a member species might get lost by chance during Newborn formation. In our simulations, we chose  
222 Newborn’s target total biomass  $BM_{target} = 100$  biomass (50~100 cells). Unless otherwise stated, we  
223 fixed the input Resource  $R(0)$  to support a maximal total biomass of  $10^4$ , and chose maturation time  $T$  so  
224 that even if H and M had evolved to grow as fast as possible, total biomass would undergo ~6 doublings  
225 (increasing from ~100 to ~7000). Thus, by the end of  $T$ ,  $\leq 70\%$  Resource would be consumed by an  
226 average community. This meant that when implemented experimentally, we could avoid complications  
227 of Resource depletion and stationary phase, while not wasting too much Resource.

## 228 **Community selection may not be effective under conditions re-** 229 **flecting common lab practices**

230 We initially simulated community selection, only allowing M’s  $f_P$  to be modified by mutations while fixing  
231 H and M’s growth parameters (maximal growth rates in excess metabolites; affinities for metabolites) to  
232 their evolutionary upper bounds. Such a simplification is justified with our particular parameter choices  
233 (Table 1) for the following reasons. First, during community selection growth parameters improved to  
234 their evolutionary upper bounds anyways (Figure S8C and F). Second, we obtained qualitatively similar  
235 conclusions regardless of whether we fixed growth parameters or not (e.g. compare final community  
236 functions in Figure 3B and E versus Figure S8A and D). Later, we will show a case where growth  
237 parameters cannot be fixed to upper bounds (Figure 6). In the current case if Newborn’s total biomass  
238 is fixed to the target value, then with only  $f_P$  mutating, we can calculate the theoretical maximal  
239 community function  $P^*(T)$  and its associated optimal  $f_P$  ( $f_P^* = 0.41$ ) and optimal species ratio (Figure  
240 2B). We started with ancestral  $f_P$  lower than  $f_P^*$ . Could inter-community selection for high community  
241 function increase ancestral  $f_P$  to  $f_P^*$ , despite intra-community natural selection favoring lower  $f_P$ ?

242 As expected, in control simulations where Adult communities were randomly chosen to reproduce,  
243 community function was driven to zero by natural selection as fast-growing non-producing M took over  
244 (Figure S9).

245 When we used the “top-dog” strategy and chose the top-functioning communities to reproduce,  $f_P$   
246 and community function  $P(T)$  did not decline to zero, but they barely improved, and both were far  
247 below their theoretical optima (Figure 3A and B).

## 248 **Common lab practices can generate sufficiently large non-heritable** 249 **variations in community function to interfere with selection**

250 Why did community selection fail to improve  $f_P$  and community function? One possibility is that  
251 community function was not sufficiently heritable from one cycle to the next (Figure S1). We there-  
252 fore investigated the heredity of community function by examining the heredity of community function  
253 determinants.

254 Community function  $P(T)$  was largely determined by phenotypes of cells in the Newborn community.  
255 This is because maturation time was sufficiently short ( $\sim 6$  doublings) that newly-arising genotypes could  
256 not rise to high frequencies within one cycle to significantly affect community function. Since all phe-  
257 notypes except for  $f_P$  were fixed, community function had three independent determinants: Newborn's  
258 total biomass  $BM(0)$ , Newborn's fraction of M biomass  $\phi_M(0)$ , and the average  $f_P$  over all M cells in  
259 Newborn  $\bar{f}_P(0)$  (Eq 6-10).

260 A community function determinant is considered heritable if it is correlated between Newborns of  
261 one cycle (Figure 4A, bottom row) and their respective progeny Newborns in the next cycle (Figure 4A,  
262 color-matched top row). Among the three determinants,  $\bar{f}_P(0)$  was heritable (Figure 4B): if a Newborn  
263 community had a high average  $f_P$ , so would the mature Adult community and Newborn communities  
264 reproduced from it. On the other hand, Newborn total biomass  $BM(0)$  was not heritable (Figure  
265 4C). This is because when an Adult community reproduced via pipette dilution, the dilution factor was  
266 adjusted so that the total biomass of a progeny Newborn community was on average the target biomass  
267  $BM_{target}$ . Newborn's fraction of M biomass  $\phi_M(0)$ , which fluctuated around that of its parent Adult,  
268 was not heritable either (Figure 4D). This is because regardless of the species composition of Newborns,  
269 Adults would have similar steady state species composition (Figure 2A bottom panel), and so would their  
270 offspring Newborns.

271 In successful community selection, variations in community function should be mainly caused by vari-  
272 ations in its heritable determinants. However, we found that community function  $P(T)$  weakly correlated  
273 with its heritable determinant  $\bar{f}_P(0)$ , but strongly correlated with its non-heritable determinants (Figure  
274 4E-G). For example, the Newborn that would achieve the highest function had a below-median  $\bar{f}_P(0)$   
275 (left magenta dot in Figure 4E), but had high total biomass  $BM(0)$  and low fraction of M biomass  
276  $\phi_M(0)$  (Figure 4F, G). In other words, variation in community function is largely non-heritable, as it  
277 largely arises from variation in non-heritable determinants.

278 The reason for strong correlations between  $P(T)$  and the two non-heritable determinants became  
279 clear by examining community dynamics. Recall that to avoid stationary phase, we had chosen maturation  
280 time so that Resource would be in excess by the end of maturation. Thus, a "lucky" Newborn community  
281 starting with a higher-than-average total biomass would convert more Resource to Product (dotted lines  
282 in top panels of Figure S11). Similarly, if a Newborn started with higher-than-average fraction of Helper  
283 H biomass, then H would produce higher-than-average Byproduct which meant that M would endure a  
284 shorter growth lag and make more Product (dotted lines in bottom panels of Figure S11).

285 To summarize, when community function significantly correlated with its non-heritable determinants  
286 (Figure 4F & G), community selection failed to improve community function (Figure 3B).

## 287 **Reducing non-heritable variations in an experimentally feasible** 288 **manner promotes artificial community selection**

289 Reducing non-heritable variations in community function should enable community selection to work.  
290 One possibility would be to reduce the stochastic fluctuations in non-heritable determinants. Indeed,

291 when each Newborn received a fixed biomass of Helper H and Manufacturer M (“cell-sorting”; i.e.  
292 fixing  $BM(0)$  and  $\phi_M(0)$ ; Methods, Section 6), community function  $P(T)$  became strongly correlated  
293 with its heritable determinant  $\bar{f}_P(0)$  (Figure 3F). In this case, both  $\bar{f}_P$  and community function  $P(T)$   
294 improved under selection (Figure 3, D and E) to near the optimal.  $P(T)$  improvement was not seen if  
295 either Newborn total biomass or species fraction was allowed to fluctuate stochastically (Figure S12).  
296  $P(T)$  also improved if fixed numbers of H and M cells (instead of biomass) were allocated into each  
297 Newborn, even though each cell’s biomass fluctuated between 1 and 2 (Figure S13C; Methods, Section  
298 6). Allocating a fixed biomass or number of cells from each species to Newborn communities could be  
299 experimentally realized using a cell sorter if different species have different fluorescence ([54]).

300 Non-heritable variations in  $P(T)$  could also be curtailed by reducing the dependence of  $P(T)$  on  
301 non-heritable determinants. For example, we could extend the maturation time  $T$  to nearly deplete  
302 Resource. In this selection regimen, Newborns would still experience stochastic fluctuations in Newborn  
303 total biomass  $BM(0)$  and fraction of M biomass  $\phi_M(0)$ . However, all communities would end up with  
304 similar  $P(T)$  since “unlucky” communities would have time to “catch up” as “lucky” communities wait  
305 in stationary phase. Indeed, with this extended  $T$ , community function became strongly correlated  
306 with its heritable determinant  $\bar{f}_P(0)$  and community function improved without having to fix Newborn  
307 total biomass or species composition (Figure 3, J-L; Figure S13D). However in practice, non-heritable  
308 variations in community function could still arise from stochastic fluctuations in the duration of stationary  
309 phase (which could affect cell survival or recovery time in the next selection cycle).

## 310 **Bet-hedging can promote community selection when non-heritable** 311 **variations in community function hinder selection**

312 Since the highest community function may not correspond to the highest  $f_P$  (Figure 3C), we exam-  
313 ined whether a “bet-hedging” strategy might outperform the “top-dog” strategy. In the “bet-hedging”  
314 strategy, we chose, for example, the top ten Adults, each reproducing ten Newborns. Although the  
315 “bet-hedging” strategy did not work as effectively as minimizing non-heritable variations in community  
316 function (compare Figure 3 D-F “cell-sorting” with G-I “bet-hedging”; Figure S14), “bet-hedging” under  
317 a wide range of selection strengths outperformed “top-dog”. Specifically, when we used pipetting to  
318 dilute Adults into Newborns, community function failed to improve under the “top-dog” strategy, but  
319 improved when top 5 to top 50 Adult communities were chosen to reproduce (Figure S15; Figure 3,  
320 compare G-I with A-C).

321 The superiority of “bet-hedging” over “top-dog” rests on giving “unlucky” Adults a chance to repro-  
322 duce. We reached this conclusion by noting that if we minimized non-heritable variations in community  
323 function by fixing species biomass in Newborns (“cell-sorting”), then the “top-dog” strategy is superior  
324 to the “bet-hedging” strategy (Figure S16).

325 As expected, uncertainty in community function measurement - another source of non-heritable  
326 variation - interferes with community selection (compare Figure 3 A-I with Figure 5 A, C). In this case,  
327 “bet-hedging” and “cell-sorting” can synergize to increase the efficacy of community selection (Figure 5,  
328 compare B and C with D). Since it is difficult to suppress non-heritable variations in community function,  
329 the “bet-hedging” strategy could be useful for experimentalists.



## Community selection can enforce species coexistence

In most communities, species coexistence may not be guaranteed due to competition for shared resources. Here, we show that properly executed community selection could also improve the functions of such communities, in part by enforcing species coexistence. Consider an H-M community where, unlike the H-M community we have considered so far, H had the evolutionary potential to grow much faster than M. In this case, high community function not only required M to pay a fitness cost of  $f_P$ , but also required H to grow sufficiently slowly to not out-compete M.

We started community selection at ancestral growth parameters, and allowed them and  $f_P$  to mutate. When community selection was ineffective (“top-dog” with “pipetting”; Figure 6A), H’s maximal growth rate evolved to exceed M’s maximal growth rate (Figure 6A, Figure S17 ). This drove M to almost extinction, and community function was very low (Figure 6A). During effective community selection (“top-dog” with “cell-sorting” or “bet-hedging” with “pipetting”, Figure 6B-C), H’s maximal growth rate remained far below its evolutionary upper bound and far below M’s maximal growth rate (Figure 6B-C). In this case, H and M can coexist at a moderate ratio, and community function improved (Figure 6B-C).

## Robust conclusions under alternative model assumptions

We have demonstrated that when selecting for high H-M community function, seemingly innocuous experimental procedures (e.g. choosing the top-functioning Adults and pipetting portions of them to form Newborns) could be problematic. Instead, more precise procedures (e.g. “cell-sorting”) or reduced selection strength (e.g. “bet-hedging”) might be required. Our conclusions hold when we used a much lower mutation rate ( $2 \times 10^{-5}$  instead of  $2 \times 10^{-3}$  mutation per cell per generation per phenotype, Figure S18), although lower mutation rate slowed down community function improvement. Our conclusions also hold when we used a different distribution of mutation effects (a non-null mutation increasing or decreasing  $f_P$  by on average 2% or eliminating null mutants; Figure S19), or incorporating epistasis (i.e. a non-null mutation would likely reduce  $f_P$  if the current  $f_P$  was high, and enhance  $f_P$  if the current  $f_P$  was low; Figure S20; Figure S21; Methods Section 5).

To further test the generality of our conclusions, we simulated community selection on a mutualistic H-M community. Specifically, we assumed that Byproduct was inhibitory to H. Thus, H benefited M by providing Byproduct, and M benefited H by removing the inhibitory Byproduct, similar to the syntrophic community of *Desulfovibrio vulgaris* and *Methanococcus maripaludis* [55]. We obtained similar conclusions in this mutualistic H-M community (Figure S22). We have also shown that similar conclusions hold for communities where member species may not coexist (Figure 6).

In summary, our conclusions seem general under a variety of model assumptions, and apply to a variety of communities.

## Discussions

How might we improve functions of multi-species microbial communities via artificial selection? A common and highly valuable approach is to identify appropriate combinations of species types. For example, by using cellulose as the main carbon source in a process called “enrichment”, Kato et al. obtained a community consisting of a few species that together degrade cellulose [56]. A more elaborate scheme is to perform artificial community selection to improve a desired community trait [10, 11, 14, 13, 17].

370 However, if we solely rely on species types, then without a constant influx of new species, commu-  
371 nity function will likely level off quickly [12, 21]. Here, we consider artificial selection of communities  
372 with defined member species so that improvement of community function requires new genotypes that  
373 contribute more toward the community function of interest at a cost to itself.

## 374 **Community selection can be challenging but is feasible**

375 Artificial selection of whole communities to improve a costly community function requires careful consid-  
376 erations. We have considered species choice (Figures 2), mutation rate, the total number of communities  
377 under selection, Newborn target total biomass (bottleneck size; Figure S7), the number of generations  
378 during maturation (which in turn depends on the amount of Resource added to each Newborn and the  
379 maturation time; Figure S7), selection strength (Figure 3), and how we reproduce Adults (e.g. volumet-  
380 ric pipetting versus “cell-sorting”, Figure 3), and the uncertainty in community function measurements  
381 (Figure 5).

382 Many of these considerations face dilemmas. For example, a large Newborn size ( $BM_{target}$ ) would  
383 lead to reproducible take-over by non-contributors (Figure S7), but a small Newborn size would mean  
384 that large non-heritable variations in community function can readily arise and interfere with selection  
385 unless special measures are taken (Figure 3).

386 We can take obvious steps to mitigate non-heritable variations in community function. For example,  
387 we can repeatedly measure community function to increase measurement precision, thereby facilitating  
388 selection (Figure 5). We can also use the bet-hedging strategy so that lower-functioning communities  
389 harboring desirable genotypes can have a chance to reproduce (Figure 3). We can use a cell sorter to  
390 fix the cell number or biomass of member species in Newborns so that community function suffers less  
391 non-heritable variations (Figure 3).

392 The need to suppress non-heritable variations in community function can have practical implications  
393 that may initially seem non-intuitive. For example, when shared resource is non-limiting (to avoid  
394 stationary phase), we must dilute a chosen Adult community to a fixed target biomass instead of by a  
395 fixed-fold. This is because otherwise, selection would fail as we choose larger and larger Newborn size  
396 instead of higher and higher  $f_P$  (Methods, Section 7; Figure S23).

397 The definition of community function is also critical. If we had defined community function as Product  
398 per M biomass in the Adult community  $P(T)/M(T)$  (which is approximately proportional to  $\frac{f_P}{1-f_P}$ : see  
399 Methods Section 7), then we will be selecting for higher and higher  $f_P$ , and M can go extinct (Figure  
400 S2). Note that certain types of community function might be easier to improve if they are insensitive to  
401 fluctuations in Newborn species biomass. An example is the H:M ratio which converges to a fixed value  
402 during maturation (Figure 2A bottom panel).

## 403 **Intra-community selection versus inter-community selection**

404 When improving a costly community function, intra-community selection and inter-community selection  
405 are both important. Intra-community selection occurs during community maturation, and favors fast  
406 growers. Inter-community selection occurs during community reproduction, and favors high community  
407 function.

408 For production cost  $f_P$ , intra-community selection favors low  $f_P$ , while inter-community selection  
409 favors  $f_P^*$ , the  $f_P$  leading to the highest community function. Thus, when current  $f_P < f_P^*$ , inter-  
410 community selection runs against intra-community selection. When current  $f_P > f_P^*$ , intra- and inter-  
411 community selections are aligned.

412 For growth parameters (maximal growth rates, affinities for metabolites), depending on their evolu-  
413 tionary upper bounds, the two selection forces may or may not be aligned. For example, using parameters  
414 in Table 1, improving growth parameters promoted community function (Figure S8A-C; Figure S24A).  
415 This is because with these choices of evolutionary upper bounds, H could not evolve to grow so fast to  
416 overwhelm M. Thus, with sufficient Resource and without the danger of species loss (Figure 2 bottom),  
417 faster H and M growth resulted in more Byproduct, larger M populations, and consequently higher Prod-  
418 uct level. If H could evolve to grow faster than M, then increasing growth parameters could decrease  
419 community function due to H dominance (Figure 6A; Figure S17A; Figure S24B), although properly exe-  
420 cuted community selection can improve community function while promoting species coexistence (Figure  
421 6B, C).

## 422 **Contrasting selection at different levels**

423 From a “gene-centric” perspective, selection of individuals bears resemblance to selection of communities,  
424 as the survival of an individual relies on synergistic interactions between different genes at different activity  
425 levels. To ensure sufficient heredity between an individual and its offspring, elaborate cellular mechanisms  
426 have evolved, and they include cell cycle checkpoints to ensure accurate DNA replication and segregation  
427 [57], small RNA-mediated silencing of transposons [58], and CRISPR-Cas degradation of foreign viral  
428 DNA [59]. In community selection, heredity-enhancing mechanisms such as stable species ratio (Figure  
429 2A bottom panel) could already be in place or arise due to mutations that affect species interactions. If  
430 a mechanism such as endosymbiosis should evolve in response to community selection, then community  
431 selection could transition to individual selection.

432 Group selection, and in a related sense, kin selection [39, 40, 60, 41, 42, 43, 44, 45, 46, 47, 48, 49,  
433 50, 51, 52], have been extensively examined to explain, for example, the evolution of traits that lower  
434 individual fitness but increase the success of a group (e.g. sterile ants helping the survival of an ant  
435 colony). Note that the term “group selection” has often been used to describe individual selection in  
436 spatially-structured populations without group births and deaths, although such usage has been criticized  
437 [61]. Interestingly, artificial group selection can sometimes be viewed as artificial individual selection. For  
438 example, when Newborn groups start with a single contributor, then artificial group selection is equivalent  
439 to artificial individual selection where the trait under selection is the founder’s ability to produce a product  
440 over time as it grows into a population. On the other hand, if group function relies on distinct genotypes  
441 interacting synergistically, then group selection is similar to community selection.

442 Group selection can be thought of as a special case of community selection, except that group function  
443 can arise as a single founder multiplies. Therefore, group selection and community selection are similar  
444 in some aspects, but differ in other aspects. First, in both group selection and community selection,  
445 Newborn size must not be too large [62, 63] and maturation time must not be too long. Otherwise,  
446 all entities (groups or communities) will accumulate non-contributors in a similar fashion, and this low  
447 inter-entity variation impedes selection (Price equation [53]; Figure S1B; Figure S7). Second, species  
448 interactions in a community could drive species composition to a value sub-optimal for community  
449 function ([64]). This could also occur during artificial group selection if the founder genotype gives rise  
450 to sub-populations of distinct phenotypes interacting synergistically to generate group function (e.g. the  
451 growth of cyanobacteria filaments relying on differentiating into nitrogen-fixing cells and photosynthetic  
452 cells [65]). Otherwise, the problem of sub-optimal composition does not exist for group selection. Finally,  
453 in group selection, when a Newborn group starts with a small number of individuals (e.g. one individual),  
454 a fraction of Newborn groups of the next cycle will be highly similar to the original Newborn group (Figure  
455 S1B, bottom panel). This facilitates group selection. In contrast, when a Newborn community starts

456 with a small number of total individuals, large stochastic fluctuations in Newborn composition can  
457 interfere with community selection (Figure 3). In the extreme case, a member species may even be lost  
458 by chance. Even if a fixed biomass of each species is sorted into Newborns, heredity is much reduced  
459 during community selection due to random sampling of genotypes from member species. For example,  
460 if Newborn groups are initiated with a single contributor and if the highest-functioning Adult group has  
461 accumulated 50% non-contributors, then 50% Newborn groups of the next cycle will be initiated with a  
462 single contributor and thus display group function. In contrast, if a Newborn community starts with one  
463 contributor from each of the two species and 50% non-contributors have accumulated in each species,  
464 then only  $50\% \times 50\% = 25\%$  Newborn communities of the next cycle will be initiated with contributors  
465 from both species and display community function.

## 466 **Community function may not be maximized through pre-optimizing** 467 **member species in monocultures**

468 If we know how each member species contributes to community function, might we pre-optimize member  
469 species in monocultures before assembling them into high-functioning communities? This turned out to  
470 be challenging due to the difficulty of recapitulating community dynamics in monocultures. For example,  
471 when we tried to improve M's  $f_P$  by artificial group selection,  $f_P$  failed to improve to  $f_P^*$  optimal for  
472 community function. Specifically, we started with  $n_{tot}$  of 100 Newborn M groups, each inoculated with  
473 one M cell (to facilitate group selection, Figure S1B bottom panel) [62]. We would supply each Newborn  
474 M group with the same amount of Resource as we would for H-M communities and excess Byproduct  
475 (since it is difficult to reproduce community Byproduct dynamics in M groups). After incubating these  
476 M groups for the same maturation time  $T$ , the group with the highest level of Product,  $P(T)$ , would be  
477 chosen and reproduced into Newborn M groups for the next cycle. M's growth parameters improved to  
478 evolutionary upper bounds (Figure S25A), since with Resource and Byproduct in excess, more M cells  
479 would lead to higher group function. When growth parameters were fixed to evolutionary upper bounds,  
480 optimal  $f_P$  for monoculture  $P(T)$  could be calculated to occur at an intermediate value ( $f_{P, Mono}^* = 0.13$ ;  
481 Figure S25B). Optimal group function was indeed realized during selection (Figure S25A). However,  
482 optimal  $f_P$  for group function is much lower than optimal  $f_P$  for community function ( $f_P^* = 0.41$ ; see  
483 Methods Section 8 for an explanation). Thus, optimizing monoculture activity does not necessarily lead  
484 to optimized community function.

## 485 **Implications of our work**

486 In light of this study, we offer an alternative interpretation of previous work. In the work of [10], authors  
487 tested two selection regimens with Newborn sizes differing by 100-fold. The authors hypothesized that  
488 smaller Newborns would have a high level of variation which should facilitate selection. However, the  
489 hypothesis was not corroborated by experiments. As a possible explanation, the authors invoked the  
490 "butterfly effect" (the sensitivity of chaotic systems to initial conditions). Our results suggest that  
491 even for non-chaotic systems like the H-M community, selection could fail due to interference from non-  
492 heritable variations. This is because in Newborns with small sizes, fluctuations in community composition  
493 can be large, which compromises heredity of community trait.

494 A general implication of our work is that before launching a selection experiment, one should carefully  
495 design the selection regimen. Although some community functions are not sensitive to fluctuations in  
496 Newborn biomass compositions (e.g. steady state ratio or growth rate of mutualistic communities

497 [66, 37]), many are. How might we check? The first method involves estimating the “signal to noise”  
498 ratio: one could initiate Newborn community replicates and measure community functions using the most  
499 precise method (e.g. cell-sorting during Newborn formation; many repeated measurements of community  
500 function). Despite this, some levels of non-heritable variations in community function are inevitable due  
501 to, for example, non-genetic phenotypic variations among cells [67] or stochasticity in cell birth and  
502 death. If “noises” (variations among community replicates) are small compared to “signals” (variations  
503 among communities with different genotypes and thus different community functions), then one can  
504 test and possibly adopt less precise procedures (e.g. cell culture pipetting during Newborn formation;  
505 fewer repeated measurements of community function). The second method involves estimating the  
506 heritability empirically if significant variations in community function naturally arise within the first few  
507 cycles. In this case, one could experimentally evaluate whether community functions of the previous  
508 cycle are correlated with community functions of the current cycle (across independent lineages (similar  
509 to Figure 4). Regardless, given the ubiquitous nature of non-heritable variations in community function,  
510 the bet-hedging strategy should be tested.

511 Microbes can co-evolve with each other and with their host in nature [68, 69, 70]. Some have proposed  
512 that complex microbial communities such as the gut microbiota could serve as a unit of selection [16].  
513 Our work suggests that if selection for a costly microbial community function should occur in nature,  
514 then mechanisms for suppressing non-heritable variations in community function should be in place.

## 515 Future directions

516 Our work touched upon only the tip of the iceberg of community selection. We expect that certain  
517 rules will be insensitive to details of a community. For example, reducing non-heritable variations in  
518 community function and judicious bet-hedging can facilitate community selection. Regardless, many  
519 fascinating questions remain. Here, we outline a few:

520 1. How might we best “hedge bets” when choosing Adult communities to reproduce? We have  
521 chosen top ten communities to contribute an equal number of Newborns, but alternative strategies (e.g.  
522 allowing higher-functioning Adults to contribute more Newborns) may work better. This aspect might  
523 be explored through applying population genetics theories, which has considered the balance between  
524 the strength of selection and variation among the individuals.

525 2. How might migration (community mixing) impact selection? Here, we did not consider migra-  
526 tion. Excessive migration could deter community selection by allowing fast-growing non-contributors to  
527 spread. However, by combining the best genotypes of multiple member species, migration could speed up  
528 community selection, much like the effects of sexual recombination in the evolution of finite populations  
529 [71].

530 3. How might interaction structure affect selection efficacy? We have shown that our conclusions  
531 hold for two-species communities engaging in commensalism or mutualism. We have also shown that  
532 our conclusions hold regardless of whether the two species can evolve to coexist or not. The next step  
533 would be to test other types of interactions and complex interaction networks. For example, when  
534 species mutually inhibit each other, multistability could arise such that species dominance [72] and thus  
535 community function are sensitive to stochastic fluctuations in Newborn species density. How might  
536 multistability affect community selection?

537 For a complex community, there might be multiple optima of community function, especially when  
538 the optimal community function requires multiple species with partially redundant activities. Consider  
539 the community function of waste degradation where one species degrades high-concentration waste  
540 incompletely while a complementary species degrades waste thoroughly but requires low starting waste

541 concentration. If during Newborn formation, any one species is lost by chance, then community function  
542 would be stuck at local sub-optima. In this case, “bet-hedging” with community migration (mixing)  
543 could recover the lost species and help community selection reach a higher optimum.

544 4. Develop a general theory to understand how the rate of community function improvement depends  
545 on variations and heredity in community function, which are in turn affected by experimental parameters  
546 including Newborn size, the number of generations during maturation, mutation rate, the total number  
547 of communities under selection, selection strength, migration frequency, precision in community function  
548 measurement, and fluctuations during community reproduction.

549 5. Experimentally test model predictions. The assay for community function should be fast and  
550 precise. If community function is sensitive to species biomass in Newborns, then member species should  
551 ideally be distinguishable by flow cytometer (e.g. different fluorescence or different scattering patterns).  
552 Note that cell-sorting only needs to be performed on several high-functioning communities, and thus  
553 would not be cost prohibitive.

554 6. Discover interaction mechanisms important for community function. Once high-functioning com-  
555 munities are obtained through selection, we could compare metagenomes of evolved communities with  
556 those of ancestral communities. This would illuminate species interactions that are important for com-  
557 munity function.

558

# Methods

559

## 1 Equations

560

561  $H$ , the biomass of H, changes as a function of growth and death,

$$\frac{dH}{dt} = g_H(\hat{R})H - \delta_H H \quad (1)$$

562 Grow rate  $g_H$  depends on the level of Resource  $\hat{R}$  (hat ^ representing pre-scaled value) as described by  
563 the Monod growth model

$$g_H(\hat{R}) = g_{Hmax} \frac{\hat{R}}{\hat{R} + \hat{K}_{HR}}$$

564 where  $\hat{K}_{HR}$  is the  $\hat{R}$  at which  $g_{Hmax}/2$  is achieved.  $\delta_H$  is the death rate of H. Note that since agricultural  
565 waste is in excess, its level does not change and thus does not enter the equation.

566  $M$ , the biomass of M, changes as a function of growth and death,

$$\frac{dM}{dt} = (1 - f_P) g_M(\hat{R}, \hat{B})M - \delta_M M \quad (2)$$

567 Total potential growth rate of M  $g_M$  depends on the levels of Resource and Byproduct ( $\hat{R}$  and  $\hat{B}$ )  
568 according to the Mankad-Bungay model [27] due to its experimental support:

$$g_M(\hat{R}, \hat{B}) = g_{Mmax} \frac{\hat{R}_M \hat{B}_M}{\hat{R}_M + \hat{B}_M} \left( \frac{1}{\hat{R}_M + 1} + \frac{1}{\hat{B}_M + 1} \right)$$

569 where  $\hat{R}_M = \hat{R}/\hat{K}_{MR}$  and  $\hat{B}_M = \hat{B}/\hat{K}_{MB}$  (Figure S3).  $1 - f_P$  fraction of M growth is channeled to  
570 biomass increase.  $f_P$  fraction of M growth is channeled to making Product:

$$\frac{d\hat{P}}{dt} = \tilde{r}_P f_P g_M(\hat{R}, \hat{B})M \quad (3)$$

571 where  $\tilde{r}_P$  is the amount of Product made at the cost of one M biomass (tilde ~ representing scaling  
572 factor, see below and Table 1).

573 Resource  $\hat{R}$  is consumed proportionally to the growth of M and H; Byproduct  $\hat{B}$  is released propor-  
574 tionally to H growth and consumed proportionally to M growth:

$$\frac{d\hat{R}}{dt} = -\hat{c}_{RM} g_M(\hat{R}, \hat{B})M - \hat{c}_{RH} g_H(\hat{R})H \quad (4)$$

$$\frac{d\hat{B}}{dt} = \tilde{r}_B g_H(\hat{R})H - \hat{c}_{BM} g_M(\hat{R}, \hat{B})M \quad (5)$$

575 Here,  $\hat{c}_{RM}$  and  $\hat{c}_{RH}$  are the amounts of  $\hat{R}$  consumed per potential M biomass and H biomass, respectively.  
576  $\hat{c}_{BM}$  is the amount of  $\hat{B}$  consumed per potential M biomass.  $\tilde{r}_B$  is the amount of  $\hat{B}$  released per H  
577 biomass grown. Our model assumes that Byproduct or Product is generated proportionally to H or M  
578 biomass grown, which is reasonable given the stoichiometry of metabolic reactions and experimental  
579 support [73]. The volume of community is set to be 1, and thus cell or metabolite quantities (which are  
580 considered here) are numerically identical to cell or metabolite concentrations.

581 In equations above, scaling factors are marked by “~”, and will become 1 after scaling. Variables and  
 582 parameters with hats will be scaled and lose their hats afterwards. Variables and parameters without  
 583 hats will not be scaled. We scale Resource-related variable ( $\hat{R}$ ) and parameters ( $\hat{K}_{MR}$ ,  $\hat{K}_{HR}$ ,  $\hat{c}_{RM}$ ,  
 584 and  $\hat{c}_{RH}$ ) against  $\tilde{R}(0)$  (Resource supplied to Newborn), Byproduct-related variable ( $\hat{B}$ ) and parameters  
 585 ( $\hat{K}_{MB}$  and  $\hat{c}_{BM}$ ) against  $\tilde{r}_B$  (amount of Byproduct released per H biomass grown), and Product-related  
 586 variable ( $\hat{P}$ ) against  $\tilde{r}_P$  (amount of Product made at the cost of one M biomass). For biologists who  
 587 usually think of quantities with units, the purpose of scaling (and getting rid of units) is to reduce the  
 588 number of parameters. For example, H biomass growth rate can be re-written as:

$$\begin{aligned} g_H(\hat{R}) &= g_{Hmax} \frac{\hat{R}}{\hat{R} + \hat{K}_{HR}} \\ &= g_{Hmax} \left( \frac{\hat{R}}{\tilde{R}(0)} \right) / \left( \frac{\hat{R}}{\tilde{R}(0)} + \frac{\hat{K}_{HR}}{\tilde{R}(0)} \right) \\ &= g_{Hmax} \frac{R}{(R + K_{HR})} \\ &= g_H(R) \end{aligned}$$

589 where  $R = \hat{R}/\tilde{R}(0)$  and  $K_{HR} = \hat{K}_{HR}/\tilde{R}(0)$ . Thus, the unscaled  $g_H(\hat{R})$  and the scaled  $g_H(R)$  share  
 590 identical forms (Figure S3). After scaling, the value of  $\tilde{R}(0)$  becomes irrelevant (1 with no unit). Similarly,  
 591 since  $\hat{R}_M = \frac{\hat{R}}{\tilde{R}(0)} / \frac{\hat{K}_{MR}}{\tilde{R}(0)} = \frac{R}{K_{MR}} = R_M$  and  $\hat{B}_M = \frac{\hat{B}}{\tilde{r}_B} / \frac{\hat{K}_{MB}}{\tilde{r}_B} = \frac{B}{K_{MB}} = B_M$ ,  $g_M(\hat{R}, \hat{B}) = g_M(R, B)$   
 592 (Figure S4).

593 Thus, scaled equations are

$$\frac{dH}{dt} = g_H(R)H - \delta_H H \quad (6)$$

$$\frac{dM}{dt} = (1 - f_P) g_M(R, B)M - \delta_M M \quad (7)$$

$$\begin{aligned} \frac{dP}{dt} &= \frac{d\hat{P}}{\tilde{r}_P dt} \\ &= f_P g_M(\hat{R}, \hat{B})M \\ &= f_P g_M(R, B)M \end{aligned} \quad (8)$$

$$\begin{aligned} \frac{dR}{dt} &= \frac{d\hat{R}/\tilde{R}(0)}{dt} \\ &= -\frac{\hat{c}_{RM}}{\tilde{R}(0)} g_M(\hat{R}, \hat{B})M - \frac{\hat{c}_{RH}}{\tilde{R}(0)} g_H(\hat{R})H \\ &= -c_{RM} g_M(R, B)M - c_{RH} g_H(R)H \end{aligned} \quad (9)$$

$$\begin{aligned} \frac{dB}{dt} &= \frac{d\hat{B}/\tilde{r}_B}{dt} \\ &= g_H(\hat{R})H - \frac{\hat{c}_{BM}}{\tilde{r}_B} g_M(\hat{R}, \hat{B})M \\ &= g_H(R)H - c_{BM} g_M(R, B)M \end{aligned} \quad (10)$$



594 We have not scaled time here, although time can also be scaled by, for example, the community  
 595 maturation time. Here, time has the unit of unit time (e.g. hr), and to avoid repetition, we often drop  
 596 the time unit. After scaling, values of all parameters (including scaling factors) are in Table 1, and  
 597 variables in our model and simulations are summarized in Table 2.

598 From Eq. 10:

$$\int_0^T \frac{dB}{dt} dt = \int_0^T g_H(R)H dt - \int_0^T c_{BM}g_M(R, B)M dt. \quad (11)$$

599 If we approximate Eq. 6-7 by ignoring the death rates so that  $\frac{dH}{dt} \approx g_H(R)H$  and  $\frac{dM}{dt} \approx (1 - f_P)g_M(R, B)M$ ,  
 600 Eq. 11 becomes

$$B(T) \approx \int_0^T \frac{dH}{dt} dt - \frac{c_{BM}}{1 - f_P} \int_0^T \frac{dM}{dt} dt. \quad (12)$$

601 If B is the limiting factor for the growth of M so that B is mostly depleted, we can approximate  
 602  $B \approx 0$ . If T is large enough so that both M and H has multiplied significantly and  $H(T) \gg H(0)$  and  
 603  $M(T) \gg M(0)$ , Eq. 12 becomes

$$H(T) - H(0) - \frac{c_{BM}}{1 - f_P} (M(T) - M(0)) \approx H(T) - \frac{c_{BM}}{1 - f_P} M(T) \approx 0,$$

604 the M:H ratio at time T is

$$\frac{M(T)}{H(T)} \approx \frac{1 - f_P}{c_{BM}}. \quad (13)$$

605 The steady state  $\phi_M, \phi_{M,SS}$ , is then

$$\phi_{M,SS} \approx \frac{1 - f_P}{1 - f_P + c_{BM}}, \quad (14)$$

606 because if a community has  $\phi_M(0) = \phi_{M,SS}$  at its Newborn stage, it has the same  $\phi_M(T) = \phi_{M,SS}$  at  
 607 its Adult stage.

608 In our simulations, because we supplied the H-M community with abundant R to avoid stationary  
 609 phase, H grows almost at the maximal rate through T and releases B. If  $f_P$  is not too large ( $f_P < 0.4$ ),  
 610 which is satisfied in our simulations, M grows at a maximal rate allowed by B and keeps B at a low  
 611 level. Thus, Eq. 14 is applicable and predicts the steady-state  $\phi_{M,SS}$  well (see Figure S26). Note that  
 612 significant deviation occurs when  $f_P > 0.4$ . This is because when  $f_P$  is large, M's biomass does not  
 613 grow fast enough to deplete B so that we cannot approximate  $B(T) \approx 0$  anymore.

## 614 2 Parameter choices

615 Our parameter choices are based on experimental measurements from a variety of organisms. Additionally,  
 616 we chose growth parameters (maximal growth rates and affinities for metabolites) of ancestral and evolved  
 617 H and M so that 1) the two species can coexist at a moderate ratio for a range of  $f_P$  over multiple  
 618 selection cycles and 2) improving all growth parameters up to their evolutionary upper bounds generally  
 619 improves community function (Methods Section 3). This way, we could simplify our simulation by fixing  
 620 growth parameters at their respective evolutionary upper bounds. With only one mutable parameter  
 621 ( $f_P$ ), we can identify the optimal  $f_P^*$  associated with maximal community function (Figure 2B).

622 For ancestral H, we set  $g_{Hmax} = 0.25$  (equivalent to 2.8-hr doubling time if we choose hr as the time  
 623 unit),  $K_{HR} = 1$  and  $c_{RH} = 10^{-4}$  (both with unit of  $\tilde{R}(0)$ ) (Table 1). This way, ancestral H can grow by

|                | Definition                                                                                      | Ancestral                                | Evolved                     |
|----------------|-------------------------------------------------------------------------------------------------|------------------------------------------|-----------------------------|
| $\tilde{r}_B$  | amount of $\hat{B}$ released per H biomass grown                                                | scaling factor, 1                        | no change                   |
| $\tilde{r}_P$  | amount of $\hat{P}$ released at the cost of one M biomass                                       | scaling factor, 1                        | no change                   |
| $\tilde{R}(0)$ | initial amount of Resource in Newborn                                                           | scaling factor, 1                        |                             |
| $f_P$          | fraction of M growth diverted to producing P                                                    | 0.10                                     | 0.13#                       |
| $K_{MR}$       | fold of $\tilde{R}(0)$ at which $g_{Mmax}/2$ is achieved in excess B                            | 1                                        | 1/3*                        |
| $K_{MB}$       | amount of $\hat{B}$ at which $g_{Mmax}/2$ is achieved in excess R, scaled against $\tilde{r}_B$ | $\frac{5}{3} \times 10^2$                | $\frac{1}{3} \times 10^2$ * |
| $K_{HR}$       | fold of $\tilde{R}(0)$ at which $g_{Hmax}/2$ is achieved                                        | 1                                        | 1/5*                        |
| $g_{Mmax}$     | maximal biomass growth rate of M                                                                | 0.58/unit time                           | 0.7/unit time*              |
| $g_{Hmax}$     | maximal biomass growth rate of H                                                                | 0.25/unit time                           | 0.3/unit time*              |
| $\delta_M$     | death rate of M                                                                                 | $3.5 \times 10^{-3}$ /unit time          | no change                   |
| $\delta_H$     | death rate of H                                                                                 | $1.5 \times 10^{-3}$ /unit time          | no change                   |
| $c_{RM}$       | fraction of $\tilde{R}(0)$ consumed per M biomass grown                                         | $10^{-4}$                                | no change                   |
| $c_{RH}$       | fraction of $\tilde{R}(0)$ consumed per H biomass grown                                         | $10^{-4}$                                | no change                   |
| $c_{BM}$       | amount of $\hat{B}$ consumed per M biomass grown, scaled against $\tilde{r}_B$                  | $\frac{1}{3}$                            | no change                   |
| $P_{mut}$      | mutation probability per cell division for each mutable phenotype                               | $2 \times 10^{-5} \sim 2 \times 10^{-3}$ |                             |

Table 1: Parameters for ancestral and evolved (growth- and mono-adapted) H and M. Parameters in the “Evolved” column are used for most simulations and figures unless otherwise specified. For maximal growth rates, \* represents evolutionary upper bound. For  $K_{SpeciesMetabolite}$ , \* represents evolutionary lower bound, which corresponds to evolutionary upper bound for Species’s affinity for Metabolite ( $1/K_{SpeciesMetabolite}$ ). # is from Figure S25B. In Methods Section 2, we explained our parameter choices (including why we hold some parameters constant during evolution).

| Symbols               | Definition                                                                                     |
|-----------------------|------------------------------------------------------------------------------------------------|
| $T$                   | Community maturation time, corresponding to the duration of a selection cycle                  |
| $t$                   | Time within a selection cycle, $0 \leq t \leq T$                                               |
| $M(t), H(t)$          | The biomass of M or H in a community at time $t$                                               |
| $BM(t) = M(t) + H(t)$ | The total biomass in a community at time $t$                                                   |
| $\phi_M(t)$           | The fraction of M biomass at time $t$                                                          |
| $BM_{target}$         | Pre-set target total biomass of Newborns during community reproduction                         |
| $I_M(t), I_H(t)$      | The integer number of M or H cells in a community at time $t$                                  |
| $\varphi_M(t)$        | The fraction of M individuals at time $t$                                                      |
| $L_M(t), L_H(t)$      | The biomass (length) of an individual M or H cell at time $t$ , $1 \leq L_M(t), L_H(t) \leq 2$ |
| $\bar{L}$             | The average biomass (length) of an individual M or H cell.                                     |
| $P(t)$                | The amount of Product P in a community at time $t$ , scaled by $\tilde{r}_P$                   |
| $R(t)$                | The amount of Resource R in a community at time $t$ , scaled by $\tilde{R}(0)$                 |
| $B(t)$                | The amount of Byproduct B in a community at time $t$ , scaled by $\tilde{r}_B$                 |
| $n_D$                 | The fold dilution when reproducing an Adult community                                          |
| $n_{tot}$             | Total number of communities under selection in each cycle                                      |

Table 2: A summary of variables used in the simulation.

624 about 10-fold by the end of  $T = 17$ . These parameters are biologically realistic. For example, for a *lys-*  
625 *S. cerevisiae* strain with lysine as Resource, un-scaled Monod constant is  $\hat{K} = 1 \mu\text{M}$ , and consumption  
626  $\hat{c}$  is 2 fmole/cell (Ref. [38]'s Figure 2 and Source Data 1, bioRxiv). Thus, if we choose 10  $\mu\text{L}$  as the  
627 community volume  $\hat{V}$  and 2  $\mu\text{M}$  as the initial Resource concentration, then  $\tilde{R}(0) = 2 \times 10^4$  fmole. After  
628 scaling,  $K = \hat{K}\hat{V}/\tilde{R}(0) = 0.5$  and  $c = \hat{c}/\tilde{R}(0) = 10^{-4}$ , comparable to values in Table 1.

629 To ensure the coexistence of H and M, M must grow faster than H for part of the maturation cycle.  
630 Since we have assumed M and H to have the same affinity for R (Table 1),  $g_{Mmax}$  must exceed  $g_{Hmax}$ ,  
631 and M's affinity for Byproduct ( $1/K_{MB}$ ) must be sufficiently large. Moreover, metabolite release and  
632 consumption need to be balanced to avoid extreme ratios between metabolite releaser and consumer.  
633 Thus for ancestral M, we chose  $g_{Mmax} = 0.58$  (equivalent to a doubling time of 1.2 hrs). We set  $c_{BM} = \frac{1}{3}$   
634 (units of  $\tilde{r}_B$ ), meaning that Byproduct released during one H biomass growth is sufficient to generate  
635 3 potential M biomass, which is biologically achievable ([37, 74]). When we chose  $K_{MB} = \frac{5}{3} \times 10^2$   
636 (units of  $\tilde{r}_B$ ), H and M can coexist for a range of  $f_P$  (Figure 2). This value is biologically realistic. For  
637 example, suppose that H releases hypoxanthine as Byproduct. A hypoxanthine-requiring *S. cerevisiae* M  
638 strain evolved under hypoxanthine limitation could achieve a Monod constant for hypoxanthine at 0.1  
639  $\mu\text{M}$  (bioRxiv). If the volume of the community is 10  $\mu\text{L}$ , then  $K_{MB} = \frac{5}{3} \times 10^2$  (units of  $\tilde{r}_B$ ) corresponds  
640 to an absolute release rate  $\tilde{r}_B = 0.1 \mu\text{M} \times 10\mu\text{L}/(\frac{5}{3} \times 10^2) = 6$  fmole per releaser biomass born. At 8  
641 hour doubling time, this translates to 6 fmole/(1 cell  $\times$  8 hr)  $\approx$  0.75 fmole/cell/hr, within the ballpark of  
642 experimental observation ( $\sim$ 0.3 fmole/cell/hr, bioRxiv). As a comparison, a lysine-overproducing yeast  
643 strain reaches a release rate of 0.8 fmole/cell/hr (bioRxiv) and a leucine-overproducing strain reaches  
644 a release rate of 4.2 fmole/cell/hr ([74]). Death rates  $\delta_H$  and  $\delta_M$  were chosen to be 0.5% of H and  
645 M's respective upper bound of maximal growth rate, which are within the ballpark of experimental  
646 observations (e.g. the death rate of a *lys-* strain in lysine-limited chemostat is 0.4% of maximal growth  
647 rate, bioRxiv).

648 We assume that H and M consume the same amount of R per new cell ( $c_{RH} = c_{RM}$ ) since the biomass  
649 of various microbes share similar elemental (e.g. carbon or nitrogen) compositions [75]. Specifically,  
650  $c_{RH} = c_{RM} = 10^{-4}$  (units of  $\tilde{R}(0)$ ), meaning that the Resource supplied to each Newborn community  
651 can yield a maximum of  $10^4$  total biomass.

652 In some simulations (e.g. Figures 6, S8, S17), growth parameters (maximal growth rates  $g_{Mmax}$   
653 and  $g_{Hmax}$  and affinities for nutrients  $1/K_{MR}$ ,  $1/K_{MB}$ , and  $1/K_{HR}$ ) and production cost parameter  
654 ( $0 \leq f_P \leq 1$ ) were allowed to change from ancestral values during community maturation, since these  
655 phenotypes have been observed to rapidly evolve within tens to hundreds of generations ([29, 30, 31, 32]).  
656 For example, several-fold improvement in nutrient affinity and  $\sim$ 20% increase in maximal growth rate  
657 have been observed in experimental evolution [32, 30]. We therefore allowed affinities  $1/K_{MR}$ ,  $1/K_{HR}$ ,  
658 and  $1/K_{MB}$  to increase by up to 3-fold, 5-fold, and 5-fold respectively, and allowed  $g_{Hmax}$  and  $g_{Mmax}$   
659 to increase by up to 20%. These bounds also ensured that evolved H and M could coexist for  $f_P < 0.5$ ,  
660 and that Resource was on average not depleted by  $T$  to avoid cells entering stationary phase.

661 We also simulated community selection where improved growth parameters could reduce community  
662 function (Figures 6 and S17). In this simulation,  $g_{Hmax}$  was allowed to increase by up to 220% and each  
663 Newborn community was supplied with R that can support up to  $10^5$  cells (10 units of  $\tilde{R}(0)$ ).

664 Although maximal growth rate and nutrient affinity can sometimes show trade-off (e.g. Ref. [30]),  
665 for simplicity we assumed here that they are independent of each other. We held metabolite consumption  
666 ( $c_{RM}$ ,  $c_{BM}$ ,  $c_{RH}$ ) constant because conversion of essential elements such as carbon and nitrogen into  
667 biomass is unlikely to evolve quickly and dramatically, especially when these elements are not in large  
668 excess ([75]). Similarly, we held the scaling factors  $\tilde{r}_P$  and  $\tilde{r}_B$  constant, assuming that they do not  
669 change rapidly during evolution due to stoichiometric constraints of biochemical reactions. We held  
670 death rates ( $\delta_M$ ,  $\delta_H$ ) constant because they are much smaller than growth rates in general and thus any

671 changes are likely inconsequential.

### 672 3 Choosing growth parameter ranges so that we can fix growth 673 parameters to upper bounds

674 Improving individual growth (maximal growth rate and affinity for metabolites) does not always lead  
675 to improved community function (Figures 6 and S17). However, we have chosen H and M growth  
676 parameters so that improving them from their ancestral values up to upper bounds generally improves  
677 community function (see below). When Newborn communities are assembled from “growth-adapted” H  
678 and M with growth parameters at upper bounds, two advantages are apparent.

679 First, after fixing growth parameters of H and M to their upper bounds, we can identify a locally  
680 maximal community function. Specifically, for a Newborn with total biomass  $BM(0) = 100$  and fixed  
681 Resource  $R$ , we can calculate  $P(T)$  under various  $f_P$  and  $\phi_M(0)$ , assuming that all M cells have the same  
682  $f_P$ . Since both numbers range between 0 and 1, we calculate  $P(T, f_P = 0.01 \times i, \phi_M(0) = 0.01 \times j)$   
683 for integers  $i$  and  $j$  between 1 and 99. There is a single maximum for  $P(T)$  when  $i = 41$  and  $j = 54$ .  
684 In other words, if M invests  $f_P^* = 0.41$  of its potential growth to make Product and if the fraction of M  
685 biomass in Newborn  $\phi_M^*(0) = 0.54$ , then maximal community function  $P^*(T)$  is achieved (Figure 2B;  
686 magenta dashed line in Figure 3).

687 Second, growth-adapted H and M are evolutionarily stable in the sense that deviations (reductions)  
688 from upper bounds will reduce both individual fitness and community function, and are therefore disfa-  
689 vored by intra-community selection and inter-community selection.

690 Below, we present evidence that within our parameter ranges (Table 1), improving growth parameters  
691 generally improves community function. When  $f_P$  is optimal for community function ( $f_P^* = 0.41$ ), if we  
692 fix four of the five growth parameters to their upper bounds, then as the remaining growth parameter  
693 improves, community function increases (magenta lines in top panels of Figure S27). Moreover, mutants  
694 with a reduced growth parameter are out-competed by their growth-adapted counterparts (magenta lines  
695 in bottom panels of Figure S27).

696 When  $f_P = f_{P, Mono}^* = 0.13$  (optimal for M-monoculture function in Figure S25; the starting genotype  
697 for most community selection trials in this paper), community function and individual fitness generally  
698 increase as growth parameters improve (black dashed lines in Figure S27). However, when M’s affinity for  
699 Resource ( $1/K_{MR}$ ) is reduced from upper bound, fitness improves slightly (black dashed line in Panel J,  
700 Figure S27). Mathematically speaking, this is a consequence of the Mankad-Bungay model [27] (Figure  
701 S4B). Let  $R_M = R/K_{MR}$  and  $B_M = B/K_{MB}$ . Then,

$$\begin{aligned} \frac{\partial g_M}{\partial K_{MR}} &= \frac{\partial g}{\partial R_M} \frac{\partial R_M}{\partial K_{MR}} = \frac{\partial \left[ g_{max} \frac{R_M B_M}{R_M + B_M} \left( \frac{1}{1 + R_M} + \frac{1}{1 + B_M} \right) \right]}{\partial R_M} \frac{\partial R_M}{\partial K_{MR}} \\ &= g_{max} \frac{-R_M}{K_{MR}} \left[ \frac{B_M (R_M + B_M) - R_M B_M}{(R_M + B_M)^2} \left( \frac{1}{1 + R_M} + \frac{1}{1 + B_M} \right) - \frac{R_M B_M}{R_M + B_M} \frac{1}{(1 + R_M)^2} \right] \\ &= g_{max} \frac{R_M B_M}{(R_M + B_M) K_{MR}} \left( \frac{R_M}{(1 + R_M)^2} - \frac{B_M}{R_M + B_M} \left( \frac{1}{1 + R_M} + \frac{1}{1 + B_M} \right) \right) \end{aligned}$$

702 If  $R_M \ll 1 \ll B_M$  (corresponding to limiting R and abundant B),

$$\frac{R_M}{(1 + R_M)^2} - \frac{B_M}{R_M + B_M} \left( \frac{1}{1 + R_M} + \frac{1}{1 + B_M} \right) \approx \frac{R_M}{(1 + R_M)^2} - \frac{1}{1 + R_M} = -\frac{1}{(1 + R_M)^2} \quad (15)$$

703 and thus  $\frac{\partial g_M}{\partial K_{MR}} < 0$ . This is the familiar case where growth rate increases as the Monod constant  
704 decreases (i.e. affinity increases). However, if  $B_M \ll 1 \ll R_M$

$$\frac{R_M}{(1 + R_M)^2} - \frac{B_M}{R_M + B_M} \left( \frac{1}{1 + R_M} + \frac{1}{1 + B_M} \right) \approx \frac{1}{R_M} - \frac{B_M}{R_M} \left( \frac{1}{1 + B_M} \right) = \frac{1}{R_M(1 + B_M)} \quad (16)$$

705 and thus  $\frac{\partial g_M}{\partial K_{MR}} > 0$ . In this case, growth rate decreases as the Monod constant decreases (i.e. affinity  
706 increases). In other words, decreased affinity for the abundant nutrient improves growth rate. Transporter  
707 competition for membrane space [76] could lead to this result, since reduced affinity for abundant nutrient  
708 may increase affinity for rare nutrient. At the beginning of each cycle, R is abundant and B is limiting  
709 (Eq. 16). Therefore M cells with lower affinity for R will grow faster than those with higher affinity  
710 (Figure S28). At the end of each cycle, the opposite is true (Figure S28). As  $f_P$  decreases, M diverts  
711 more toward biomass growth and the first stage of B limitation lasts longer. Consequently, M can gain  
712 a slightly higher overall fitness by lowering the affinity for R (Figure S28A).

713 Regardless, decreased M affinity for Resource ( $1/K_{MR}$ ) only leads to a very slight increase in M  
714 fitness (Figure S27J) and a very slight decrease in  $P(T)$  (Figure S28B). Moreover, this only occurs at  
715 low  $f_P$  at the beginning of community selection, and thus may be neglected. Indeed, if we start all growth  
716 parameters at their upper bounds and  $f_P = 0.13$ , and perform community selection while allowing all  
717 parameters to vary (Figure S29), then  $1/K_{MR}$  decreases somewhat, yet the dynamics of  $f_P$  is similar to  
718 when we only allow  $f_P$  to change (compare Figure S29D with Figure 3A).

## 719 4 Mutation rate and the distribution of mutation effects

720 Literature values of mutation rate and the distribution of mutation effects are highly variable. Below, we  
721 briefly review the literature and discuss rationales of our choices.

722 Among mutations, a fraction is neutral in that they do not affect the phenotype of interest. For  
723 example, the vast majority of synonymous mutations are neutral [77]. Furthermore, mutations with small  
724 effects may appear neutral, which can depend on the effective population size and selection condition.  
725 For example, at low population size due to genetic drift (i.e. changes in allele frequencies due to chance),  
726 a beneficial or deleterious mutation may not be selected for or selected against, and is thus neutral with  
727 respect to selection [78, 79]. As another example, the same mutation in an antibiotic-degrading gene  
728 can be neutral under low antibiotic concentrations, but deleterious under high antibiotic concentrations  
729 [80]. We term all these cases as “neutral” mutations.

730 Since a larger fraction of neutral mutations is equivalent to a lower rate of phenotype-altering muta-  
731 tions, our simulations define “mutation rate” as the rate of non-neutral mutations that either enhance  
732 a phenotype (“enhancing mutations”) or diminish a phenotype (“diminishing mutations”). Enhancing  
733 mutations of maximal growth rates ( $g_{Hmax}$  and  $g_{Mmax}$ ) and of nutrient affinities ( $1/K_{HR}$ ,  $1/K_{MR}$ ,  
734  $1/K_{MB}$ ) enhance the fitness of an individual (“beneficial mutations”). In contrast, enhancing mutations  
735 in  $f_P$  diminish the fitness of an individual (“deleterious mutations”).

736 Depending on the phenotype, the rate of phenotype-altering mutations is highly variable. Although  
737 mutations that cause qualitative phenotypic changes (e.g. drug resistance) occur at a rate of  $10^{-8} \sim 10^{-6}$   
738 per genome per generation in bacteria and yeast [81, 82], mutations affecting quantitative traits such as  
739 growth rate occur much more frequently. For example in yeast, mutations that increase growth rate by  
740  $\geq 2\%$  occur at a rate of  $\sim 10^{-4}$  per genome per generation (calculated from Figure 3 of Ref. [83]), and  
741 mutations that reduce growth rate occur at a rate of  $10^{-4} \sim 10^{-3}$  per genome per generation [35, 84].  
742 Moreover, mutation rate can be elevated by as much as 100-fold in hyper-mutators where DNA repair

743 is dysfunctional [85, 86, 84]. In our simulations, we assume a high, but biologically feasible, rate of  
 744  $2 \times 10^{-3}$  phenotype-altering mutations per cell per generation per phenotype to speed up computation.  
 745 At this rate, an average community would sample  $\sim 20$  new mutations per phenotype during maturation.  
 746 We have also simulated with a 100-fold lower mutation rate. As expected, evolutionary dynamics slowed  
 747 down, but all of our conclusions still held (Figure S18).

748 Among phenotype-altering mutations, tens of percent create null mutants, as illustrated by experimen-  
 749 tal studies on protein, viruses, and yeast [33, 34, 35]. Thus, we assumed that 50% of phenotype-altering  
 750 mutations were null (i.e. resulting in zero maximal growth rate, zero affinity for metabolite, or zero  $f_P$ ).  
 751 Among non-null mutations, the relative abundances of enhancing versus diminishing mutations are highly  
 752 variable in different experiments. It can be impacted by effective population size. For example, with a  
 753 large effective population size, the survival rate of beneficial mutations is 1000-fold lower due to clonal  
 754 interference (competition between beneficial mutations) [87]. The relative abundance of enhancing ver-  
 755 sus diminishing mutations also strongly depends on the starting phenotype [33, 80, 78]. For example  
 756 with ampicillin as a substrate, the wild-type TEM-1  $\beta$ -lactamase is a “perfect” enzyme. Consequently,  
 757 mutations were either neutral or diminishing, and few enhanced enzyme activity [80]. In contrast with  
 758 a novel substrate such as cefotaxime, the enzyme had undetectable activity, and diminishing mutations  
 759 were not detected while 2% of tested mutations were enhancing [80]. When modeling H-M commu-  
 760 nities, we assumed that the ancestral H and M had intermediate phenotypes that can be enhanced or  
 761 diminished.

762 We based our distribution of mutation effects on experimental studies where a large number of  
 763 enhancing and diminishing mutants have been quantified in an unbiased fashion. An example is a study  
 764 from the Dunham lab where the fitness effects of thousands of *S. cerevisiae* mutations were quantified  
 765 under various nutrient limitations [36]. Specifically for each nutrient limitation, the authors first measured  
 766  $\Delta s_{WT} = (w_{WT} - \bar{w}_{WT})/\bar{w}_{WT} = w_{WT}/\bar{w}_{WT} - 1$ , the deviation in relative fitness of thousands of bar-  
 767 coded wild-type control strains from the wild-type mean fitness (i.e. selection coefficients). Due to  
 768 experimental noise,  $\Delta s_{WT}$  is distributed with zero mean and non-zero variance. Then, the authors  
 769 measured thousands of  $\Delta s_{MT}$ , each corresponding to the relative fitness change of a bar-coded mutant  
 770 strain with respect to the mean of wild-type fitness (i.e.  $\Delta s_{MT} = (w_{MT} - \bar{w}_{WT})/\bar{w}_{WT}$ ). From these two  
 771 distributions, we derived  $\mu_{\Delta s}$ , the probability density function (PDF) of relative fitness change caused by  
 772 mutations  $\Delta s = \Delta s_{MT} - \Delta s_{WT}$  (see Figure S6 for interpreting PDF), in the following manner.

773 First, we calculated  $\mu_m(\Delta s_{MT})$ , the discrete PDF of the relative fitness change of mutant strains,  
 774 with bin width 0.04. In other words,  $\mu_m(\Delta s_{MT}) = \text{counts in the bin of } [\Delta s_{MT} - 0.02, \Delta s_{MT} + 0.02]$   
 775 / total counts/0.04 where  $\Delta s_{MT}$  ranges from  $-0.6$  and  $0.6$  which is sufficient to cover the range of  
 776 experimental outcome. The Poissonian uncertainty of  $\mu_m$  is  $\delta\mu_m(\Delta s_{MT}) = \sqrt{\text{counts per bin}/\text{total}}$   
 777 counts/0.04. Repeating this process for the wild-type collection, we obtained the PDF of the relative  
 778 fitness change of wild-type strains  $\mu_w(\Delta s_{WT})$ . Next, from  $\mu_w(\Delta s_{WT})$  and  $\mu_m(\Delta s_{MT})$ , we derived  
 779  $\mu_{\Delta s}(\Delta s)$ , the PDF of  $\Delta s$  with bin width 0.04:

$$\mu_{\Delta s}(\Delta s = i \times 0.04) = 0.04 \times \sum_{j=-\infty}^{+\infty} \mu_w(j \times 0.04) \mu_m((i + j) \times 0.04). \quad (17)$$

780 assuming that  $\Delta s_{MT}$  and  $\Delta s_{WT}$  are independent from each other. Here,  $i$  is an integer from  $-15$  to  $15$ .  
 781 The uncertainty for  $\mu_{\Delta s}$  was calculated by propagation of error. That is, if  $f$  is a function of  $x_i$  ( $i = 1,$   
 782  $2, \dots, n$ ), then  $s_f$ , the error of  $f$ , is  $s_f^2 = \sum \left( \frac{\partial f}{\partial x_i} s_{x_i} \right)^2$ , where  $s_{x_i}$  is the error or uncertainty of  $x_i$ . Thus,

$$\delta\mu_{\Delta s}(i) = 0.04 \times \sqrt{\sum_j \left[ (\delta\mu_w(j) \mu_m(i + j))^2 + (\mu_w(j) \delta\mu_m(i + j))^2 \right]} \quad (18)$$

783 where  $\mu_w(j)$  is short-hand notation for  $\mu_w(\Delta s_{WT} = j \times 0.04)$  and so on. Our calculated  $\mu_{\Delta s}(\Delta s)$  with  
784 error bar of  $\delta\mu_{\Delta s}$  is shown in Figure S6.

785 Our reanalysis demonstrated that distributions of mutation fitness effects  $\mu_{\Delta s}(\Delta s)$  are largely con-  
786 served regardless of nutrient conditions and mutation types (Figure S6B). In all cases, the relative fitness  
787 changes caused by beneficial (fitness-enhancing) and deleterious (fitness-diminishing) mutations can be  
788 approximated by a bilateral exponential distribution with means  $s_+$  and  $s_-$  for the positive and negative  
789 halves, respectively. After normalizing the total probability to 1, we have:

$$\mu_{\Delta s}(\Delta s) = \begin{cases} \frac{1}{s_+ + s_- (1 - \exp(-1/s_-))} \exp(-\Delta s/s_+) & \text{if } \Delta s \geq 0 \\ \frac{1}{s_+ + s_- (1 - \exp(-1/s_-))} \exp(\Delta s/s_-) & \text{if } -1 < \Delta s < 0 \end{cases} \quad (19)$$

790 We fitted the Dunham lab haploid data (since microbes are often haploid) to Eq. 19, using  
791  $\mu_{\Delta s}(i)/\delta\mu_{\Delta s}(i)$  as the weight for non-linear least squared regression (green lines in Figure S6B). We  
792 obtained  $s_+ = 0.050 \pm 0.002$  and  $s_- = 0.067 \pm 0.003$ .

793 Interestingly, exponential distribution described the fitness effects of deleterious mutations in an RNA  
794 virus remarkably well [33]. Based on extreme value theory, the fitness effects of beneficial mutations  
795 were predicted to follow an exponential distribution [88, 89], which has gained experimental support  
796 from bacterium and virus [90, 91, 92] (although see [93, 83] for counter examples). Evolutionary models  
797 based on exponential distributions of fitness effects have shown good agreements with experimental data  
798 [87, 94].

799 We have also simulated smaller average mutational effects based on measurements of spontaneous  
800 or chemically-induced (instead of deletion) mutations. For example, the fitness effects of nonlethal  
801 deleterious mutations in *S. cerevisiae* were mostly 1%~5% [35], and the mean selection coefficient  
802 of beneficial mutations in *E. coli* was 1%~2% [90, 87]. As an alternative, we also simulated with  
803  $s_+ = s_- = 0.02$ , and obtained the same conclusions (Figure S19).

## 804 5 Modeling epistasis on $f_P$

805 Epistasis, where the effect of a new mutation depends on prior mutations (“genetic background”), is  
806 known to affect evolutionary dynamics. Epistatic effects have been quantified in various ways. Exper-  
807 iments on viruses, bacteria, yeast, and proteins have demonstrated that if two mutations were both  
808 deleterious or random, viable double mutants experienced epistatic effects that distributed nearly sym-  
809 metrically around a value close to zero [95, 96, 97, 98, 99]. In other words, a significant fraction of  
810 mutation pairs show no epistasis, and a small fraction show positive or negative epistasis (i.e. a double  
811 mutant displays a stronger or weaker phenotype than expected from additive effects of the two single  
812 mutants). Epistasis between two beneficial mutations can vary from being predominantly negative [96]  
813 to being symmetrically distributed around zero [97]. Furthermore, a beneficial mutation tends to confer  
814 a lower beneficial effect if the background already has high fitness (“diminishing returns”) [100, 97, 101].

815 A mathematical model by Wisner et al. incorporates diminishing-returns epistasis [94]. In this model,  
816 beneficial mutations of advantage  $s$  in the ancestral background are exponentially distributed with proba-  
817 bility density function (PDF)  $\alpha \exp(-\alpha s)$ , where  $1/\alpha > 0$  is the mean advantage. After a mutation with  
818 advantage  $s$  has occurred, the mean advantage of the next mutation would be reduced to  $1/[\alpha(1 + gs)]$ ,  
819 where  $g > 0$  is the “diminishing returns parameter”. Wisner et al. estimates  $g \approx 6$ . This model  
820 quantitatively explains the fitness dynamics of evolving *E. coli* populations.

821 Based on the above experimental and theoretical literature, we modeled epistasis on  $f_P$  in the  
822 following manner. Let the relative mutation effect on  $f_P$  be  $\Delta f_P = (f_{P,mut} - f_P)/f_P$  (note  $\Delta f_P \geq -1$ ).  
823 Then,  $\mu(\Delta f_P, f_P)$ , the PDF of  $\Delta f_P$  at the current  $f_P$  value, is described by a form similar to Eq. 19:

$$\mu(\Delta f_P, f_P) = \begin{cases} \frac{1}{s_+(f_P)+s_-(f_P)(1-\exp(-1/s_-(f_P)))} \exp(-\Delta f_P/s_+(f_P)) & \text{if } \Delta f_P \geq 0 \\ \frac{1}{s_+(f_P)+s_-(f_P)(1-\exp(-1/s_-(f_P)))} \exp(\Delta f_P/s_-(f_P)) & \text{if } -1 < \Delta f_P < 0 \end{cases} \quad (20)$$

824 Here,  $s_+(f_P)$  and  $s_-(f_P)$  are respectively the mean  $\Delta f_P$  for enhancing and diminishing mutations  
 825 at current  $f_P$ . We assigned  $s_+(f_P) = s_{+init}/(1 + g \times (f_P/f_{P,init} - 1))$ , where  $f_{P,init}$  is the  $f_P$  of the  
 826 initial background in a community selection simulation ( $f_{P,init} = f_{P,init}^* = 0.13$ ),  $s_{+init}$  is the mean  
 827 enhancing  $\Delta f_P$  occurring in the initial background, and  $0 < g < 1$  is the epistatic factor. Similarly,  
 828  $s_-(f_P) = s_{-init} \times (1 + g \times (f_P/f_{P,init} - 1))$  is the mean  $|\Delta f_P|$  for diminishing mutations at current  $f_P$ . In  
 829 the initial background, since  $f_P = f_{P,init}$ , we have  $s_+(f_P) = s_{+init}$  and  $s_-(f_P) = s_{-init}$  ( $s_{+init} = 0.050$   
 830 and  $s_{-init} = 0.067$  in Figure S6). Consistent with the diminishing returns principle, for subsequent  
 831 mutations that alter  $f_P$ , if current  $f_P > f_{P,init}$ , then a new enhancing mutation became less likely and  
 832 its mean effect smaller, while a new diminishing mutation became more likely and its mean effect bigger  
 833 (ensured by  $g > 0$ ; Figure S20 right panel). Similarly, if current  $f_P < f_{P,init}$ , then a new enhancing  
 834 mutation became more likely and its mean effect bigger, while a diminishing mutation became less likely  
 835 and its mean effect smaller (ensured by  $0 < g < 1$ ; Figure S20 left panel). In summary, our model  
 836 captured not only diminishing- returns epistasis, but also our understanding of mutational effects on  
 837 protein stability [78].

## 838 6 Simulation code of community selection

839 As described in the main text, our simulations tracked the biomass and phenotypes of individual cells as  
 840 well as the amounts of Resource, Byproduct, and Product in each community throughout community  
 841 selection. Cell biomass growth, cell division, and changes in chemical concentrations were calculated  
 842 deterministically. Stochastic processes including cell death, mutation, and the partitioning of cells of a  
 843 chosen Adult community into Newborn communities were simulated using the Monte Carlo method.

844 Specifically, each simulation was initialized with a total of  $n_{tot} = 100$  Newborn communities with  
 845 identical configuration:

- 846 • each community had 100 total cells of biomass 1. Thus, total biomass  $BM(0) = 100$ .
- 847 • 40 cells were H. 60 cells were M with identical  $f_P$ . Thus, M biomass  $M(0) = 60$  and fraction of  
 848 M biomass  $\phi_M(0) = 0.6$ .

849 Our community selection simulations did not consider mutations arising during pre-growth prior to in-  
 850 oculating Newborns of the first cycle, because incorporating pre-growth had little impact on evolution  
 851 dynamics (Figure S30). Thus, all M cells have the same phenotype, and all H cells have the same  
 852 phenotype.

853 At the beginning of each selection cycle, a random number was used to seed the random number  
 854 generator for each Newborn community. This number was saved so that the maturation of each Newborn  
 855 community can be replayed. In most simulations, the initial amount of Resource was 1 unit of  $\tilde{R}(0)$   
 856 unless otherwise specified, the initial Byproduct was  $B(0) = 0$  and the initial Product  $P(0) = 0$ .

857 The maturation time  $T$  was divided into time steps of  $\Delta\tau = 0.05$ . Resource  $R(t)$  and Byproduct  
 858  $B(t)$  during each time interval  $[\tau, \tau + \Delta\tau]$  were calculated by solving the following equations (similar to  
 859 Eqs. 9-10) using the initial condition  $R(\tau)$  and  $B(\tau)$  via the ode23s solver in Matlab:

$$860 \frac{dR}{dt} = -c_{RM}g_M(R, B)M(\tau) - c_{RH}g_H(R)H(\tau) \quad (21)$$



861

862

$$\frac{dB}{dt} = g_H(R)H(\tau) - c_{BM}g_M(R, B)M(\tau) \quad (22)$$

863 where  $M(\tau)$  and  $H(\tau)$  were the biomass of M and H at time  $\tau$  (treated as constants during time interval  
864  $[\tau, \tau + \Delta\tau]$ ), respectively. The solutions from Eq. 21 and 22 were used in the integrals below to calculate  
865 the biomass growth of H and M cells.

866 Suppose that H and M were rod-shaped organisms with a fixed diameter. Thus, the biomass of an  
867 H cell at time  $\tau$  could be written as the length variable  $L_H(\tau)$ . The continuous growth of  $L_H$  during  $\tau$   
868 and  $\tau + \Delta\tau$  could be described as

869

$$\frac{dL_H}{dt} = g_H(R)L_H$$

870 or

871

$$\ln \frac{L_H(\tau + \Delta\tau)}{L_H(\tau)} = \int_{\tau}^{\tau + \Delta\tau} g_H(R)dt.$$

872

873 Thus,

874

$$L_H(\tau + \Delta\tau) = L_H(\tau) \exp \left( \int_{\tau}^{\tau + \Delta\tau} g_H(R)dt \right). \quad (23)$$

875

876 Similarly, let the length of an M cell be  $L_M(\tau)$ . The continuous growth of M could be described as

877

$$\frac{dL_M}{dt} = (1 - f_P)g_M(R, B)L_M.$$

878

879 Thus for an M cell, its length  $L_M(\tau + \Delta\tau)$  could be described as

880

$$L_M(\tau + \Delta\tau) = L_M(\tau) \exp \left( \int_{\tau}^{\tau + \Delta\tau} (1 - f_P)g_M(R, B)dt \right). \quad (24)$$

881 From Eq. 7 and 8, within  $\Delta\tau$ ,

$$\begin{aligned} \frac{dP}{dt} &= f_P g_M(R, B)M \\ &\sim \frac{f_P}{1 - f_P} \frac{dM}{dt} \end{aligned}$$

882 and therefore

883

$$P(\tau + \Delta\tau) = P(\tau) + \frac{f_P}{1 - f_P} (M(\tau + \Delta\tau) - M(\tau))$$

884 where  $M(\tau + \Delta\tau) = \sum L_M(\tau + \Delta\tau)$  represented the sum of the biomass (or lengths) of all M cells at  
885  $\tau + \Delta\tau$ .

886 At the end of each  $\Delta\tau$ , each H and M cell had a probability of  $\delta_H \Delta\tau$  and  $\delta_M \Delta\tau$  to die, respectively.  
887 This was simulated by assigning a random number between  $[0, 1]$  for each cell. Cells assigned with a  
888 random number less than  $\delta_H \Delta\tau$  or  $\delta_M \Delta\tau$  then got eliminated. For surviving cells, if a cell's length  $\geq 2$ ,  
889 this cell would divide into two cells with half the original length.

890 After division, each mutable phenotype of each cell had a probability of  $P_{mut}$  to be modified by a  
 891 mutation (Methods, Section 4). As an example, let's consider mutations in  $f_P$ . If a mutation occurred,  
 892 then  $f_P$  would be multiplied by  $(1 + \Delta f_P)$ , where  $\Delta f_P$  was determined as below.

893 First, a uniform random number  $u_1$  between 0 and 1 was generated. If  $u_1 \leq 0.5$ ,  $\Delta f_P = -1$ ,  
 894 which represented 50% chance of a null mutation ( $f_P = 0$ ). If  $0.5 < u_1 \leq 1$ ,  $\Delta f_P$  followed the  
 895 distribution defined by Eq. 20 with  $s_+(f_P) = 0.05$  for  $f_P$ -enhancing mutations and  $s_-(f_P) = 0.067$  for  
 896  $f_P$ -diminishing mutations when epistasis was not considered (Methods, Section 4). In the simulation,  
 897  $\Delta f_P$  was generated via inverse transform sampling. Specifically,  $C(\Delta f_P)$ , the cumulative distribution  
 898 function (CDF) of  $\Delta f_P$ , could be found by integrating Eq. 19 from -1 to  $\Delta f_P$ :

$$C(\Delta f_P) = \int_{-1}^{\Delta f_P} \mu_{\Delta s}(x) dx$$

$$= \begin{cases} \frac{s_-}{s_+ + s_- (1 - e^{-1/s_-})} (\exp(\Delta f_P/s_-) - \exp(-1/s_-)) & \text{if } \Delta f_P \leq 0 \\ 1 - \frac{s_+}{s_+ + s_- (1 - e^{-1/s_-})} \exp(-\Delta f_P/s_+) & \text{if } \Delta f_P \geq 0 \end{cases} \quad (25)$$

899 The two parts of Eq. 25 overlap at  $C(\Delta f_P = 0) = s_-(1 - \exp(-1/s_-)) / [s_+ + s_-(1 - \exp(-1/s_-))]$ .

900 In order to generate  $\Delta f_P$  satisfying the distribution in Eq. 19, a uniform random number  $u_2$  between  
 901 0 and 1 was generated and we set  $C(\Delta f_P) = u_2$ . Inverting Eq. 25 yielded

$$\Delta f_P = \begin{cases} s_- \ln \left( u_2 (s_+ + s_- (1 - e^{-1/s_-})) / s_- + e^{-1/s_-} \right) & u_2 \leq \frac{s_-(1 - e^{-1/s_-})}{s_+ + s_-(1 - e^{-1/s_-})} \\ -s_+ \ln \left( (1 - u_2) (s_+ + s_- (1 - e^{-1/s_-})) / s_+ \right) & u_2 > \frac{s_-(1 - e^{-1/s_-})}{s_+ + s_-(1 - e^{-1/s_-})} \end{cases} \quad (26)$$

903 When epistasis was considered,  $s_+(f_P) = s_{+init} / (1 + g \times (f_P / f_{P,init} - 1))$  and  $s_-(f_P) = s_{-init} \times$   
 904  $(1 + g \times (f_P / f_{P,init} - 1))$  were used in Eq. 26 to calculate  $\Delta f_P$  for each cell. (Methods Section 5).

905 If a mutation increased or decreased the phenotypic parameter beyond its bound (Table 1), the  
 906 phenotypic parameter was set to the bound value.

907 The above growth/death/division/mutation cycle was repeated from time 0 to  $T$ . Note that since  
 908 the size of each M and H cell can be larger than 1, the integer numbers of M and H cells,  $I_M$  and  $I_H$ ,  
 909 are generally smaller than the numerical values of biomass  $M$  and  $H$ , respectively. At the end of  $T$ ,  
 910 Adult communities were sorted according to their  $P(T)$  values. The Adult community with the highest  
 911  $P(T)$  (or a randomly-chosen Adult in control simulations) was chosen for reproduction.

912 Before community reproduction, the current random number generator state was saved so that the  
 913 random partitioning of Adult communities could be replayed. To mimic partitioning Adult communities  
 914 via pipetting into Newborn communities with an average total biomass of  $BM_{target}$ , we first calculated the  
 915 fold by which this Adult would be diluted as  $n_D = \lfloor (M(T) + H(T)) / BM_{target} \rfloor$ . Here  $BM_{target} = 100$   
 916 was the pre-set target for Newborn total biomass, and  $\lfloor x \rfloor$  is the floor (round down) function that  
 917 generates the largest integer that is smaller than  $x$ . If the Adult community had  $I_H(T)$  H cells and  
 918  $I_M(T)$  cells,  $I_H(T) + I_M(T)$  random integers between 1 and  $n_D$  were uniformly generated so that each  
 919 M and H cell was assigned a random integer between 1 and  $n_D$ . All cells assigned with the same  
 920 random integer were then assigned to the same Newborn, generating  $n_D$  newborn communities. This  
 921 partition regimen can be experimentally implemented by pipetting  $1/n_D$  volume of an Adult community  
 922 into a new well. If  $n_D$  was less than  $n_{tot}$  (the total number of communities under selection), all  $n_D$   
 923 newborn communities were kept and the Adult with the next highest function was partitioned to obtain  
 924 an additional batch of Newborns until we obtain  $n_{tot}$  Newborns. The next cycle then began.

925 To fix  $BM(0)$  to  $BM_{target}$  and  $\phi_M(0)$  to  $\phi_M(T)$  of the parent Adult, the code randomly assigned  
 926 M cells from the chosen Adult until the total biomass of M came closest to  $BM_{target} \phi_M(T)$  without  
 927

928 exceeding it. H cells were assigned similarly. Because each M and H cells had a length between  
929 1 and 2, the biomass of M could vary between  $BM_{target}\phi_M(T) - 2$  and  $BM_{target}\phi_M(T)$  and the  
930 biomass of H could vary between  $BM_{target}(1 - \phi_M(T)) - 2$  and  $BM_{target}(1 - \phi_M(T))$ . Variations  
931 in  $BM(0)$  and  $\phi_M(0)$  were sufficiently small so that community selection improved  $\bar{f}_P(T)$  (Figure 3 D  
932 and E). We also simulated sorting cells where H and M cell numbers (instead of biomass) were fixed  
933 in Newborns. Specifically,  $\lfloor BM_{target}\varphi_M(T)/1.5 \rfloor$  M cells and  $\lfloor BM_{target}(1 - \varphi_M(T))/1.5 \rfloor$  H cells were  
934 sorted into each Newborn community, where we assumed that the average biomass of a cell was 1.5, and  
935  $\varphi_M(T) = I_M(T)/(I_M(T) + I_H(T))$  was calculated from cell numbers in the parent Adult community.  
936 We obtained the same conclusion (Figure S13, right panels).

937 To fix Newborn total biomass  $BM(0)$  to the target total biomass  $BM_{target}$  while allowing  $\phi_M(0)$  to  
938 fluctuate (Figure S12 left panels), H and M cells were randomly assigned to a Newborn community until  
939  $BM(0)$  came closest to  $BM_{target}$  without exceeding it (otherwise,  $P(T)$  might exceed the theoretical  
940 maximum). For example, suppose that a certain number of M and H cells had been sorted into a  
941 Newborn so that the total biomass was 98.6. If the next cell, either M or H, had a biomass of 1.3,  
942 this cell would go into the community so that the total biomass would be  $98.6 + 1.3 = 99.9$ . However,  
943 if a cell of mass 1.6 happened to be picked, this cell would not go into this community so that this  
944 Newborn had a total biomass of 98.6 and the cell of mass 1.6 would go to the next Newborn. Thus,  
945 each Newborn might not have exactly the biomass of  $BM_{target}$ , but rather between  $BM_{target} - 2$  and  
946  $BM_{target}$ . Experimentally, total biomass can be determined from the optical density, or from the total  
947 fluorescence if cells are fluorescently labeled ([54]). To fix the total cell number (instead of total biomass)  
948 in a Newborn, the code randomly assigned a total of  $\lfloor BM_{target}/1.5 \rfloor$  cells into each Newborn, assuming  
949 an average cell biomass of 1.5. We obtained the same conclusion, as shown in Figure S13 left panel.

950 To fix  $\phi_M(0)$  to  $\phi_M(T)$  of the chosen Adult community from the previous cycle while allowing  $BM(0)$   
951 to fluctuate (Figure S12 right panels), the code first calculated dilution fold  $n_D$  in the same fashion as  
952 mentioned above. If the Adult community had  $I_H(T)$  H cells and  $I_M(T)$  cells,  $I_M(T)$  random integers  
953 between  $[1, n_D]$  were then generated for each M cell. All M cells assigned the same random integer  
954 joined the same Newborn community. The code then randomly dispensed H cells into each Newborn  
955 until the total biomass of H came closest to  $M(0)(1 - \phi_M(T))/\phi_M(T)$  without exceeding it, where  
956  $M(0)$  was the biomass of all M cells in this Newborn community. Again, because each M and H had a  
957 biomass (or length) between 1 and 2,  $\phi_M(0)$  of each Newborn community might not be exactly  $\phi_M(T)$   
958 of the chosen Adult community. We also performed simulations where the ratio between M and H cell  
959 numbers in the Newborn community,  $I_M(0)/I_H(0)$ , was set to  $I_M(T)/I_H(T)$  of the Adult community,  
960 and obtained the same conclusion (Figure S13 center panels).

## 961 **7 Problems associated with alternative definitions of commu-** 962 **nity function and alternative means of reproducing an Adult**

963  
964 Here we describe problems associated with two alternative definitions of community function and one  
965 alternative method of community reproduction.

966 One alternative definition of community function is Product per M biomass in an Adult community:  
967  $P(T)/M(T)$ . To illustrate problems with this definition, let's calculate  $P(T)/M(T)$  assuming that cell  
968 death is negligible. From Eq. 7 and 8,

$$969 \frac{dM}{dt} = (1 - f_P)g_M M$$

970

$$\frac{dP}{dt} = f_P g_M M$$

971 where biomass growth rate  $g_M$  is a function of  $B$  and  $R$ . Thus,

$$\frac{dM}{(1 - f_P)dt} = \frac{dP}{f_P dt}$$

972 and we have

$$P(T) = \frac{f_P}{1 - f_P} (M(T) - M(0)) \approx \frac{f_P}{1 - f_P} M(T)$$

973 if  $M(T) \gg M(0)$  (true if  $T$  is long enough for cells to double at least three or four times).

974 If we define community function as  $P(T)/M(T) \approx \frac{f_P}{1 - f_P}$ , then higher community function requires  
975 higher  $\frac{f_P}{1 - f_P}$  or higher  $f_P$ . However, if we select for very high  $f_P$ , then  $M$  can go extinct (Figure 2).

976 In our community selection scheme, the average total biomass of Newborn communities was set to a  
977 constant  $BM_{target}$ . Alternatively, each Adult community can be partitioned into a constant number of  
978 Newborn communities. If Resource is not limiting, there is no competition between  $H$  and  $M$ , and  $P(T)$   
979 increases as  $M(0)$  and  $H(0)$  increase. Therefore, selection for higher  $P(T)$  results in selection for higher  
980 Newborn total biomass (instead of higher  $f_P$ ). This will continue until Resource becomes limiting, and  
981 then communities will get into the stationary phase.

## 982 **8 $f_P^*$ is smaller for M group than for H-M community**

983 For groups or communities with a certain  $\int_T g_M dt$ , we can calculate  $f_P$  optimal for community function  
984 from Eq. ?? by setting

$$\frac{dP(T)}{df_P} = M(0) \frac{d}{df_P} \left[ \frac{f_P}{1 - f_P} \exp \left( (1 - f_P) \int_T g_M dt \right) \right] = 0$$

985 We have

$$\frac{1}{(1 - f_P)^2} \exp \left( (1 - f_P) \int_T g_M dt \right) - \frac{f_P}{1 - f_P} \int_T g_M dt \exp \left( (1 - f_P) \int_T g_M dt \right) = 0$$

986 or

$$1 / \int_T g_M dt = f_P (1 - f_P).$$

987 If  $\int_T g_M dt \gg 1$ ,  $f_P$  is very small, then the optimal  $f_P$  for  $P(T)$  is

$$f_P^* \approx \left( \int_T g_M dt \right)^{-1} \quad (27)$$

988  $M$  grows faster in monoculture than in community because  $B$  is supplied in excess in monoculture while  
989 in community,  $H$ -supplied Byproduct is initially limiting. Thus,  $\int_T g_M dt$  is larger in monoculture than in  
990 community. According to Eq. 27,  $f_P^* \approx 1 / \int_T g_M dt$  is smaller for monoculture than for community.

## 9 Stochastic fluctuations during community reproduction

The number of cells in a Newborn community is approximately  $BM(0)/\bar{L}$ , where  $\bar{L}$  is the average biomass (or length) of M and H cells. This number fluctuates in a Poissonian fashion with a standard deviation of  $\sqrt{BM_{target}/\bar{L}}$ . As a result, the biomass of a Newborn communities fluctuates around  $BM_{target}$  with a standard deviation of  $\sqrt{BM_{target}/\bar{L}} \times \bar{L} = \sqrt{BM_{target}\bar{L}}$ .

Similarly,  $M(0)$  and  $H(0)$  fluctuate independently with a standard deviation of  $\sqrt{E[M(0)]\bar{L}} = \sqrt{BM_{target}\phi_M(T)\bar{L}}$  and  $\sqrt{E[H(0)]\bar{L}} = \sqrt{BM_{target}(1-\phi_M(T))\bar{L}}$ , respectively, where “E” means the expected value. Therefore,  $M(0)/H(0)$  fluctuates with a variance of

$$\begin{aligned}\text{Var}[M(0)/H(0)] &= \left(\frac{E[M(0)]}{E[H(0)]}\right)^2 \left[\frac{\text{Var}[M(0)]}{(E[M(0)])^2} - 2\frac{\text{Cov}[M(0), H(0)]}{E[M(0)]E[H(0)]} + \frac{\text{Var}[H(0)]}{(E[H(0)])^2}\right] \\ &= \frac{\phi_M(T)}{(1-\phi_M(T))^3} \frac{\bar{L}}{BM_{target}}\end{aligned}$$

where “Cov” means covariance and “Var” means variance, and  $\phi_M(T)$  is the fraction of M biomass in the Adult community from which Newborns are generated.

## 10 Mutualistic H-M community

In the mutualistic H-M community, Byproduct inhibits the growth of H. According to [102], the growth rate of *E. coli* decreases exponentially as the exogenously added acetate concentration increases. Thus, we only need to modify the growth of H by a factor of  $\exp(-B/B_0)$  where  $B$  is the concentration of Byproduct and  $B_0$  is the concentration of Byproduct at which H's growth rate is reduced by  $e^{-1} \sim 0.37$ :

$$\frac{dH}{dt} = \exp\left(-\frac{B}{B_0}\right) \frac{g_{Hmax}R}{R + K_{HR}} H - \delta_H H$$

The larger  $B_0$ , the less inhibitory effect Byproduct has on H and when  $B_0 \rightarrow +\infty$  Byproduct does not inhibit the growth of H. For simulations in Figure S22, we set  $B_0 = 2K_{MB}$ .

## Acknowledgment

We thank the following for discussions: Lin Chao (UCSD), Maitreya Dunham (UW Seattle), Corina Tarnita (Princeton), Harmit Malik (Fred Hutch), Jeff Gore (MIT), Daniel Weissman (Emory), Tony Long (UC Irvine), and Alvaro Sanchez (Yale). Some of these discussions took place at the 2017 “Eco-Evolutionary Dynamics in Nature and the Lab” workshop at Kavli Institute of Theoretical Physics, UC Santa Barbara, the 2017 “Systems Biology and Molecular Economy of Microbial Communities” workshop at the International Centre for Theoretical Physics, Trieste, Italy, and the 2018 “Physical Principles Governing the Organization of Microbial Communities” workshop at the Aspen Center for Physics, Colorado, USA. We thank Chichun Chen, Bill Hazelton, Samuel Hart, David Skelding, Doug Jackson, Maxine Linial, Delia Pinto-Santini, Kirill Korolev (Boston University), and Alex Sigal (K-RITH) for feedback on the manuscript. We are particularly indebted to Jim Bull (UT Austin) and reviewers (Sara Mitri, James Boedicker, and two anonymous reviewers) who generously provided detailed critiques. This research was facilitated by the High Performance Computing Shared Resource of the Fred Hutch (P30 CA015704).

# 1019 **Figures**

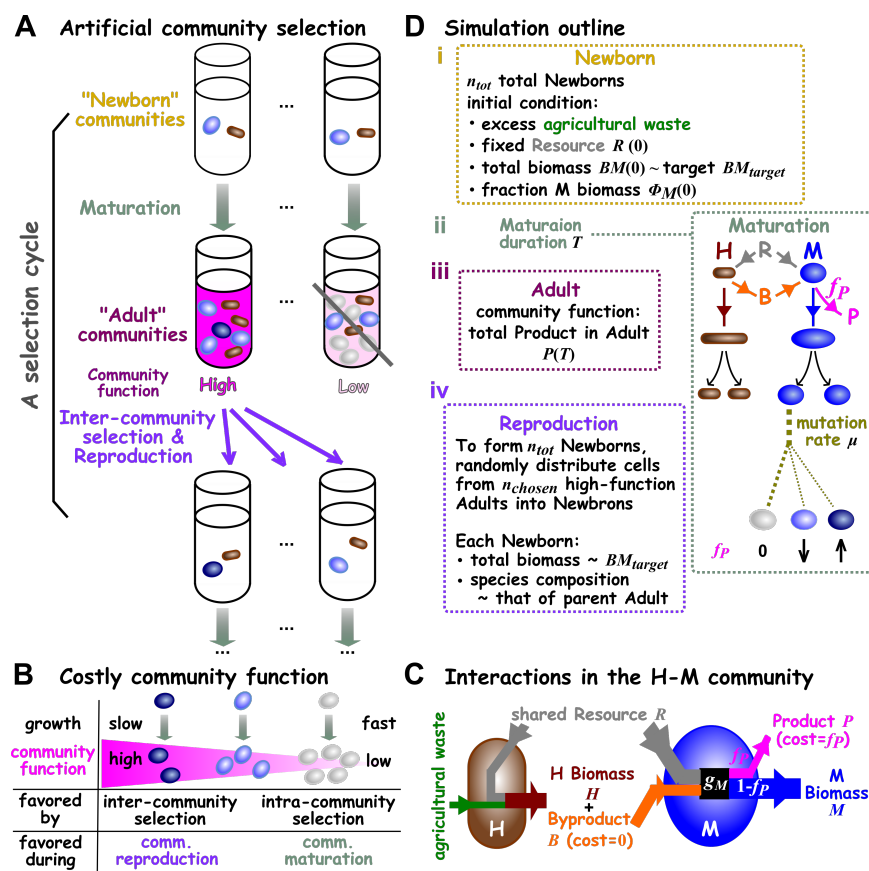

Figure 1: **Community selection.** (A) **Schematic of artificial community selection.** (B) **Costly community function.** Darker blue cells contribute more to community function per cell and thus divide more slowly than light cells. High-contributors are disfavored by intra-community selection during community maturation. However, communities dominated by high-contributors are favored by inter-community selection and have a higher chance to reproduce. (C) **A Helper-Manufacturer community that converts substrates into a product.** Helper H consumes agricultural waste (present in excess) and Resource to grow biomass, and concomitantly releases Byproduct B at no fitness cost to itself. H's Byproduct B is required by Manufacturer M. M consumes Resource and H's Byproduct, and invests a fraction  $f_P$  of its potential growth  $g_M$  to make Product P while channeling the remaining to biomass growth. When biomass growth ceases, Byproduct and Product are no longer made. The five state variables (italicized)  $H$ ,  $M$ ,  $R$ ,  $B$ , and  $P$  correspond to the amount of H biomass, M biomass, Resource, Byproduct, and Product in a community, respectively. (D) **Simulating artificial selection of H-M communities.** i. In our simulations, cycles of selection were performed on a total of  $n_{tot} = 100$  communities with the indicated initial conditions. At the beginning of the first cycle, each Newborn had a total biomass of the target biomass ( $BM_{target}=100$ ; 60 M and 40 H each of biomass 1). In subsequent cycles, each Newborn's species ratio would be approximately that of its parent Adult. The amount of Resource in each Newborn was fixed at a value that could support a total biomass of  $10^4$  (unless otherwise stated). ii. The maturation time  $T$  was chosen so that for an average community, Resource was not depleted by time  $T$  (in experimental terms, this would avoid complications of the stationary phase). During maturation, Resource  $R$ , Byproduct  $B$ , Product  $P$ , and each cell's biomass were calculated from differential equations (Methods, Section 6). Once a cell's biomass had grown from 1 to 2, it divided into two identical daughter cells. Death occurred stochastically to individual cells (not depicted). After division, mutations (different shades of oval) occurred stochastically to change a cell's phenotypes (e.g. M's  $f_P$ ). iii. At the end of a cycle, community functions (total Product  $P(T)$ ) were ranked. iv. During community reproduction, high-functioning Adults were chosen and diluted into Newborns so that on average, each Newborn had a total biomass of approximately the target biomass  $BM_{target}$ . A total of  $n_{tot} = 100$  Newborns were generated for the next selection cycle.

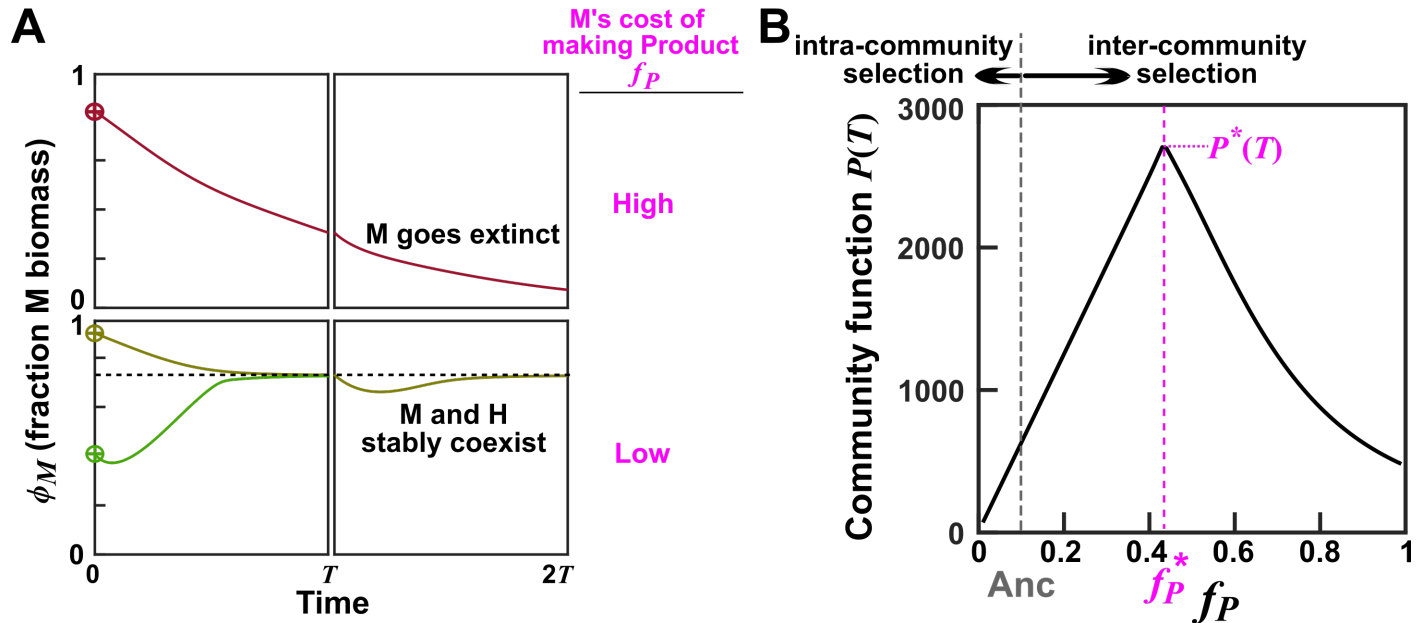

Figure 2: **Optimal community function is achieved at an intermediate cost.** Calculations were based on equations 6-10 with H and M's growth parameters fixed at their respective evolutionary upper bounds (Table 1, last column). **(A) H and M can stably coexist at low  $f_P$ .** **Top:** When  $f_P$ , the fraction of potential growth Manufacturer diverts for making Product, is high (e.g.  $f_P = 0.8$ ), M will eventually go extinct (i.e. fraction of M < 1/total population). **Bottom:** At low  $f_P$  (e.g.  $f_P = 0.1$ ), H and M can stably coexist. That is, different initial species ratios will converge to a steady state value. At the end of the first cycle (time  $T = 17$ ), Byproduct and Resource were re-set to the initial conditions at time zero (0 and  $10^4$ , respectively), and total biomass was reduced to the target value  $BM_{target}$  ( $=100$ ) while the fraction of M biomass  $\phi_M$  remained the same as that of the parent community. See main text for how values of maturation time and Resource were chosen. **(B) Optimal community function occurs at an intermediate  $f_P$ .** Community functions at various combinations of  $f_P$  and fraction of M biomass (out of  $BM_{target} = 100$  total biomass) were computed by integrating Eqs 6-10. Maximal community function  $P(T)$  is achieved at an intermediate  $f_P^* = 0.41$  (magenta dashed line) when Newborn species composition is also optimal (46 H and 54 M cells). Note that at zero  $f_P$ , no Product would be made; at  $f_P = 1$ , M would go extinct. The maximal  $P^*(T)$  could not be further improved even if we allowed all growth parameters and  $f_P$  to mutate (Figure S10). Thus,  $P^*(T)$  is locally maximal in the sense that small deviation will always reduce  $P(T)$ . Ancestral  $f_P$  (grey) is lower than  $f_P^*$ . The central question is: can community selection improve  $f_P$  to  $f_P^*$  despite natural selection's favoring lower  $f_P$ ?



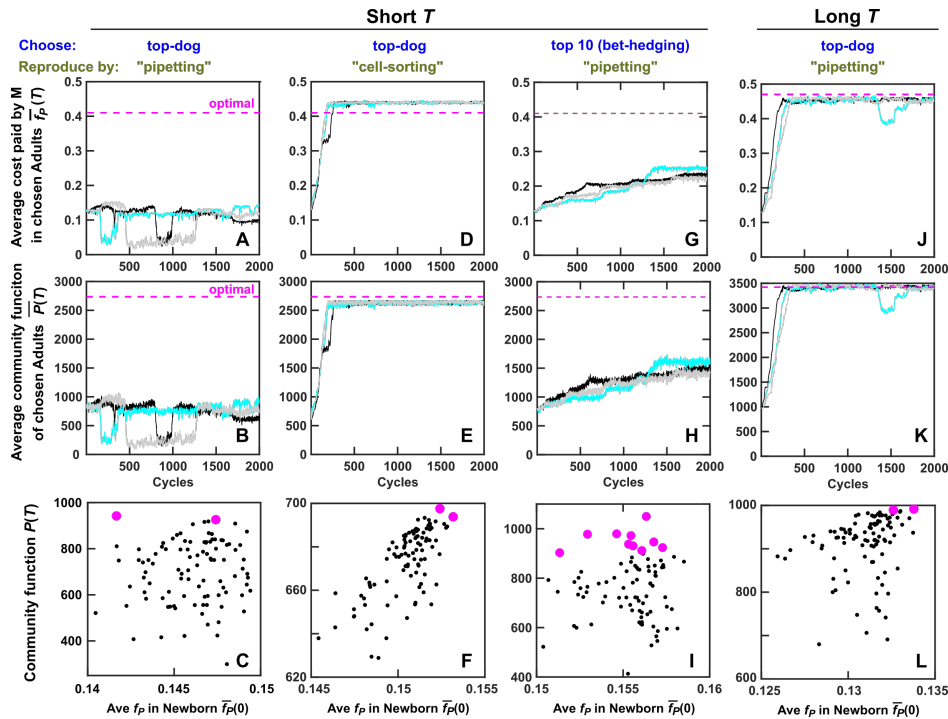

Figure 3: **Community selection can be stalled by routine experimental procedures, and succeeds when community function correlates with its heritable determinant or under the “bet-hedging” strategy.** (A-I) Evolution dynamics when the maturation time  $T$  was sufficiently short to avoid Resource depletion and stationary phase ( $T = 17$ ). (A-C) Adults were chosen using the “top-dog” strategy, and diluted into progeny Newborns through pipetting (i.e. H and M biomass fluctuated around their expected values). Community selection was not effective. Average  $f_P$  and community function failed to improve to their theoretical optima, and community function poorly correlated with its heritable determinant  $\bar{f}_P(0)$ . Black and magenta dots: un-chosen and chosen communities from one selection cycle, respectively. (D-F) Adults were chosen using the “top-dog” strategy, and a fixed H biomass and M biomass from the chosen Adults were sorted into Newborns. Community selection was successful. Community function also correlated with its heritable determinant  $\bar{f}_P(0)$ . Here, Newborn total biomass  $BM(0)$  and fraction of M biomass  $\phi_M(0)$  were respectively fixed to  $BM_{target} = 100$  and  $\phi_M(T)$  of the chosen Adult of the previous cycle. (G-I) When we chose the top ten Adults and let each reproduce 10 Newborns via pipetting, community function improved despite poor correlation between community function and its heritable determinant  $\bar{f}_P(0)$ . For selection dynamics over many cycles, see Figure S14. (J-L) Evolution dynamics when maturation time was long ( $T = 20$ ) such that most Resource was consumed by the end of  $T$ . Adults were chosen using the “top-dog” strategy, and reproduced via “pipetting”. Community selection was successful due to high correlation between community function and its heritable determinant  $\bar{f}_P(0)$ , assuming that variable duration in stationary phase would not introduce non-heritable variations in community function. Black, cyan and gray curves are three independent simulation trials.  $\bar{P}(T)$  was the average of  $P(T)$  across all chosen Adults.  $\bar{f}_P(T)$  was obtained by first averaging among M within each chosen Adult and then averaging across all chosen Adults.

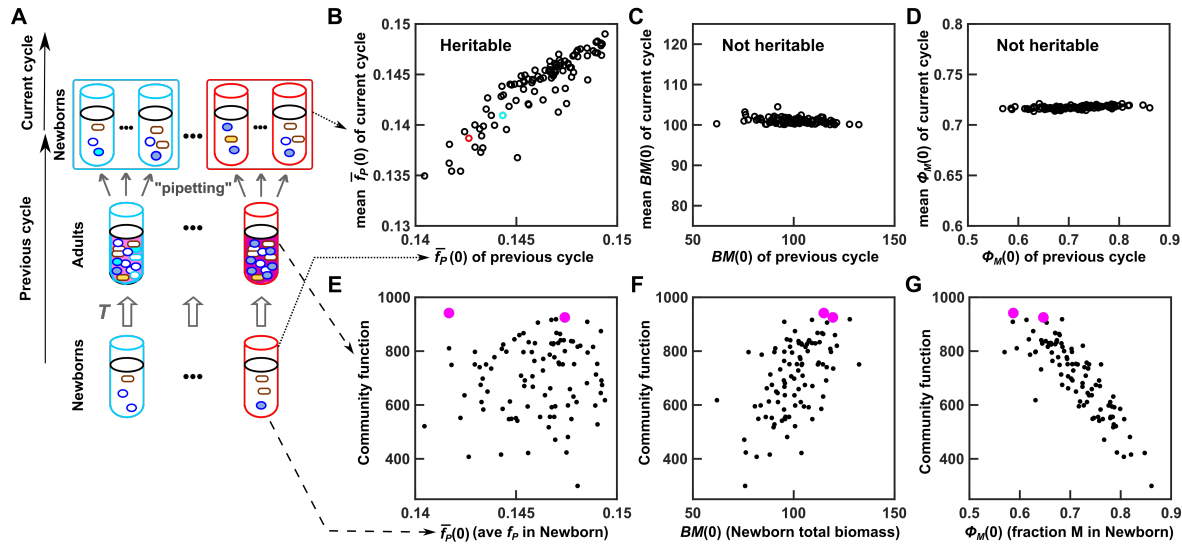

**Figure 4: During ineffective community selection, community function correlates weakly with its heritable determinant and strongly with non-heritable determinants. (A)** Schematic. Newborns and corresponding Adults from the “Previous cycle” were taken from the 180th cycle of the simulation displayed in black of Figure 3A-B. We then allowed each Adult to reproduce Newborns (“current cycle”), forming 100 lineages (tubes with the same color outline belong to the same lineage). **(B-D)** Among the three determinants of community function,  $\bar{f}_P(0)$  ( $f_P$  averaged among  $M$  cells in Newborn) is heritable, but  $BM(0)$  (total biomass of Newborn) and  $\phi_M(0)$  (fraction of  $M$  biomass in Newborn) are not. For each lineage, the community function determinant at the previous cycle was scatter plotted against the average value at the current cycle. **(E-G)** During ineffective community selection (Figure 3B),  $P(T)$  correlates weakly with heritable determinant, but strongly with non-heritable determinants. Each dot represents one community, and the two magenta dots represent the two “successful” Newborns that achieved the highest community function at adulthood.

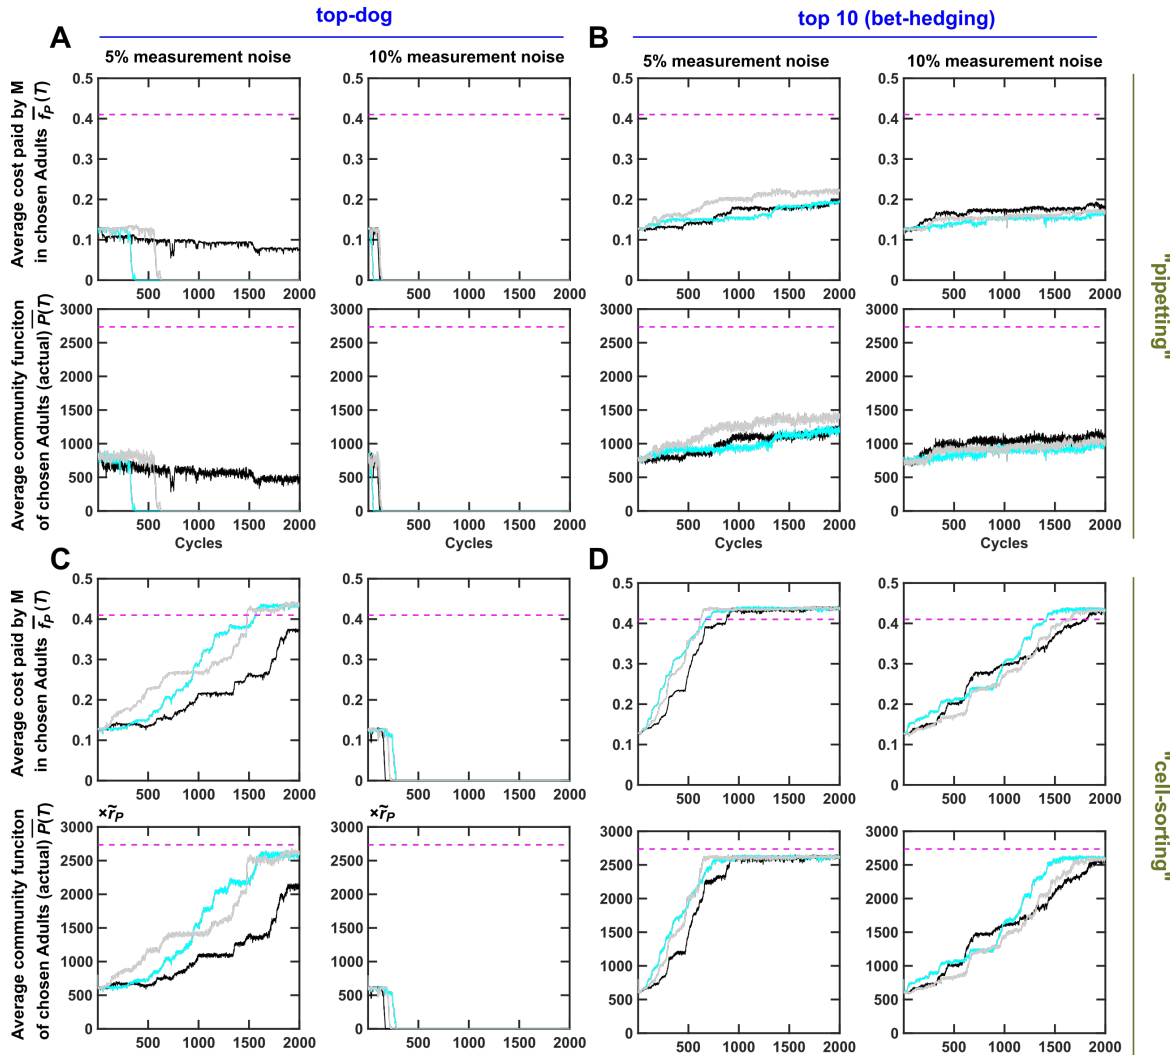

Figure 5: **Community selection impeded by community function measurement noise can be rescued by “bet-hedging” acting in synergy with “cell-sorting”.** Adult communities were chosen to reproduce based on “measured community function  $P(T)$ ” - the sum of actual  $P(T)$  and an “uncertainty term” randomly drawn from a normal distribution with zero mean and standard deviations of 5% or 10% of the ancestral  $P(T)$ . Dynamics of average  $f_P$  and average community function of the chosen Adult communities ( $\bar{f}_P(T)$  and  $\bar{P}(T)$ ) are plotted. When uncertainty in community function measurement is low (5%), cell-sorting largely rescues ineffective community selection (A-D, left panels). When uncertainty in community function measurement is high (10%), both cell-sorting and bet-hedging are required (A-D, right panels). Black, cyan and gray curves are three independent simulation trials.  $\bar{P}(T)$  was averaged across the chosen Adults.  $\bar{f}_P(T)$  was obtained by first averaging among  $M$  within each chosen Adult and then averaging across the chosen Adults.

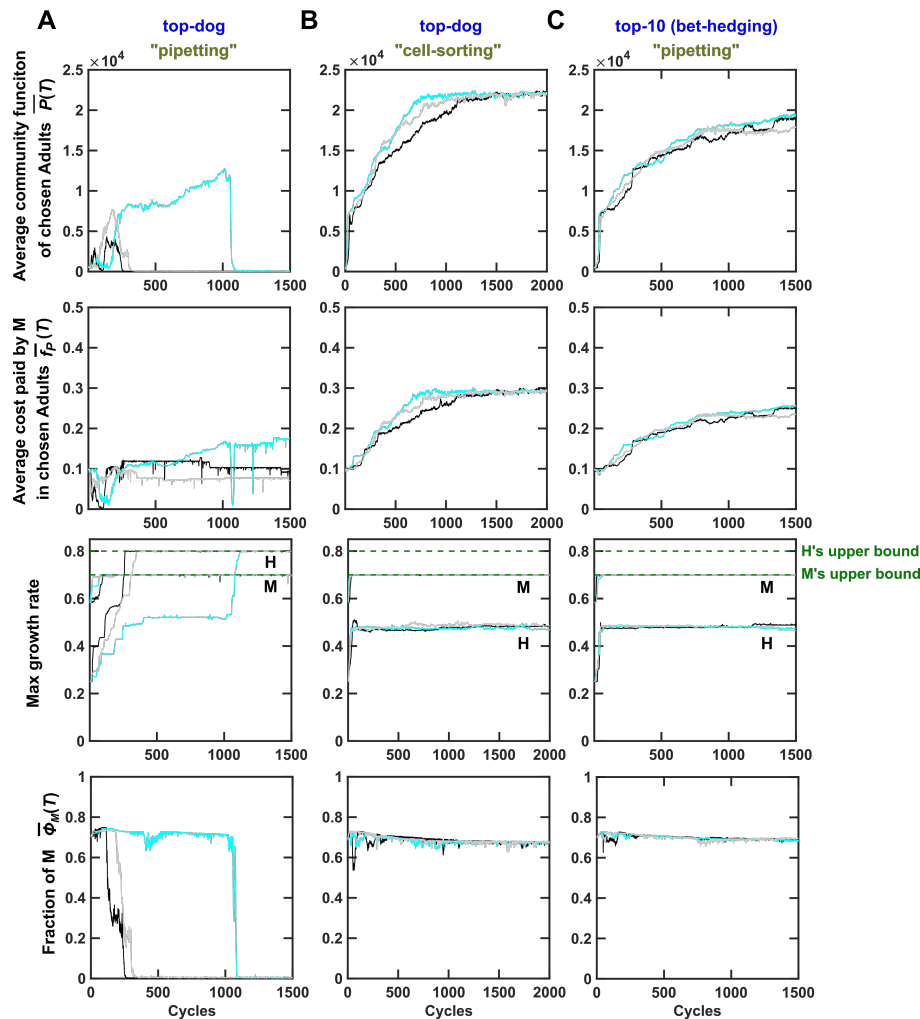

Figure 6: **Effective community selection can encourage species coexistence.** Here, the evolutionary upper bound for  $g_{Hmax}$  ( $g_{Hmax}^* = 0.8$ ) was larger than that for  $g_{Mmax}$  ( $g_{Mmax}^* = 0.7$ ), opposite to that in Figures 2-5. (A) When the “top-dog” strategy and “pipetting” were used to choose and reproduce Adult communities, M was almost outcompeted by H as H evolved to grow faster than M (third panel). Although M would ordinarily go extinct, community selection managed to maintain M at a very low level (bottom). This imbalanced species ratio resulted in very low community function (top). When community selection was effective, either using the “top-dog” strategy with “cell-sorting” (B), or the “bet-hedging” strategy with “pipetting” (C), community selection successfully improved community function and  $\bar{f}_P$ . Strikingly in both B and C, H’s growth parameter did not increase to its evolutionary upper bound (Figure S17B and C), allowing a balanced species ratio (bottom) and high community function (top). Resource supplied to Newborn communities here supports  $10^5$  total biomass to accommodate faster growth rates (and hence community function is larger than in other figures). Black, cyan and gray curves are three independent simulation trials.  $\bar{P}(T)$  and  $\bar{\phi}_M(T)$  (fraction of M biomass in Adult communities) were averaged across the chosen Adults.  $\bar{f}_P(T)$  was obtained by first averaging among M within each chosen Adult and then averaging across all chosen Adults.



# Supplementary Figures

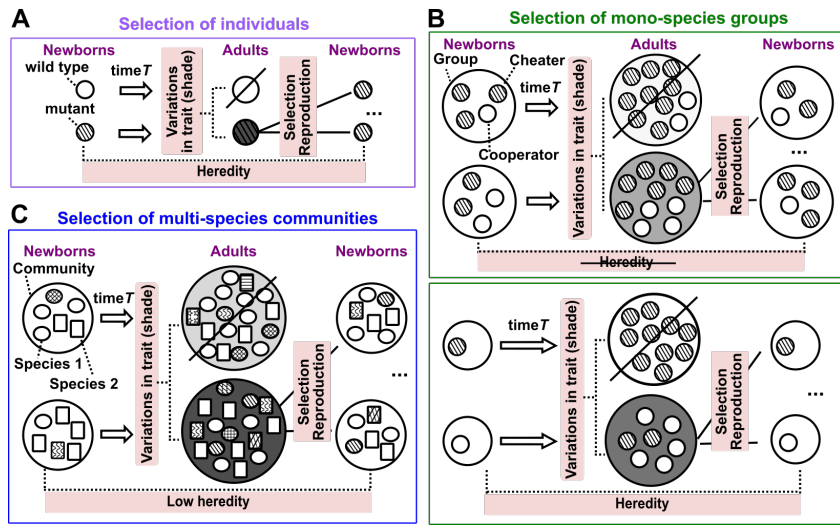

**Figure S1: Artificial selection is more challenging for multi-species communities than for individuals or mono-species groups.** Artificial selection can be applied to any population of entities [103]. An entity can be an individual (**A**), a mono-species group (**B**), or a multi-species community (**C**). Unlike natural selection which selects for fastest-growing cells, artificial selection generally selects for traits that are costly to individuals. In each selection cycle, a population of “Newborn” entities grow for maturation time  $T$  to become “Adults”. Adults expressing a higher level of the trait of interest (darker shade) are chosen to reproduce. An individual reproduces by making copies of itself, while an Adult group or community can reproduce by randomly splitting into multiple Newborns of the next selection cycle. Successful artificial selection requires that i) entities display trait variations; ii) trait variations can be selected to result in differential entity survival and reproduction; and iii) entity trait is sufficiently heritable from one selection cycle to the next [104]. In all three types of selection, entity variations can be introduced by mutations and recombinations in individuals. However, heredity can be low in community selection. (**A**) Artificial selection of individuals has been successful [18, 19, 20, 105, 106], since a trait is largely heritable so long as mutation and recombination are sufficiently rare. (**B, C**) In group and community selection, if  $T$  is small so that newly-arising genotypes cannot rise to high frequencies within a selection cycle, then Adult trait is mostly determined by Newborn *composition* (the biomass of each genotype in each member species). Then, *variation* can be defined as the dissimilarity in Newborn composition within a selection cycle, and *heredity* as the similarity of Newborn composition from one cycle to the next for Newborns connected through lineage (tubes with same-colored outlines in Figure 4A). (**B**) Artificial selection of mono-species groups has been successful [43, 45, 15]. Suppose cooperators but not cheaters pay a fitness cost to generate a product (shade). Artificial selection for groups producing high total product favors cooperator-dominated groups, although within a group, cheaters grow faster than cooperators. At a large Newborn population size (**top**), all Newborns will harbor similar fractions of cheaters, and thus inter-group variation will be small [62]. During maturation, cheater frequency will increase, thereby diminishing heredity. In contrast, when Newborn groups are initiated at a small size such as one individual (**bottom**), a Newborn group will comprise either a cooperator or a cheater, thereby ensuring variation. Furthermore, even if cheaters were to arise during maturation, a fraction of Newborns of the next cycle will by chance inherit a cooperator, thereby ensuring some level of heredity. Thus, group selection can work when Newborn size is small. (**C**) Artificial selection of multi-species communities may be hindered by insufficient heredity. During maturation, the relative abundance of genotypes and species can rapidly change due to ecological interactions and evolution, which compromises heredity. During community reproduction, stochastic fluctuations in Newborn composition further reduce heredity.

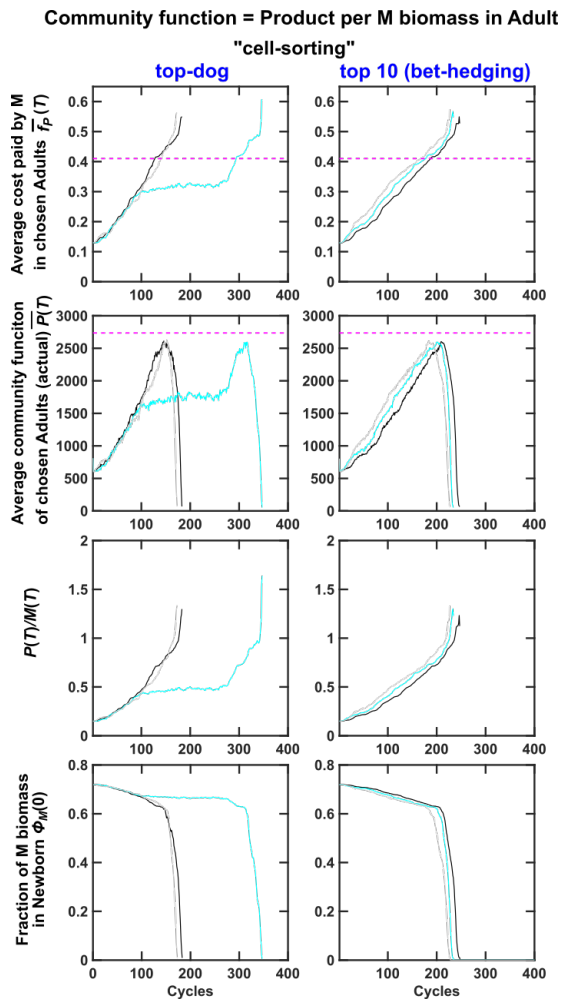

Figure S2: **Problems of defining community function as  $P(T)/M(T)$ .** When the community function was defined by  $P(T)/M(T)$ , average  $f_P$  of the chosen communities rapidly increased to such a high level that M was out-competed by H, as demonstrated by Figure 2A top panel. Consequently, selection abruptly came to a stop. Black, cyan and gray curves are three independent simulation trials.  $\bar{P}(T)$  was averaged across chosen Adults.  $\bar{f}_P(T)$  was obtained by first averaging among M within each chosen Adult, and then averaging across all chosen Adults.

**A H:** Monod kinetics, limiting R

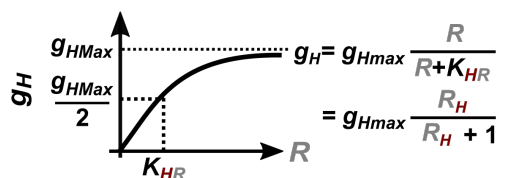

where  $g_{Hmax}$ : max H growth rate  
 $K_{HR}$ : H's Monod K for R (R for 50%  $g_{Hmax}$ )  
 $R_H = R/K_{HR}$

**B M:** Mankad & Bungay kinetics, limiting R and B

$$g_M = g_{Mmax} \frac{R_M B_M}{R_M + B_M} \left( \frac{1}{R_M + 1} + \frac{1}{B_M + 1} \right)$$

$$= \begin{cases} g_{Mmax} \frac{R_M}{R_M + 1} & \text{if } R_M \ll B_M \\ g_{Mmax} \frac{B_M}{B_M + 1} & \text{if } B_M \ll R_M \end{cases}$$

where  $R_M = R/K_{MR}$   
 $B_M = B/K_{MB}$

Figure S3: **Growth models of H and M.** (A) H growth follows Monod kinetics, reaching half maximal growth rate when  $R = K_{HR}$ . (B) M growth follows dual-substrate Mankad-Bungay kinetics. When Resource R is in great excess ( $R_M \gg B_M$ ) or Byproduct B is in great excess ( $B_M \gg R_M$ ), we recover mono-substrate Monod kinetics (A).

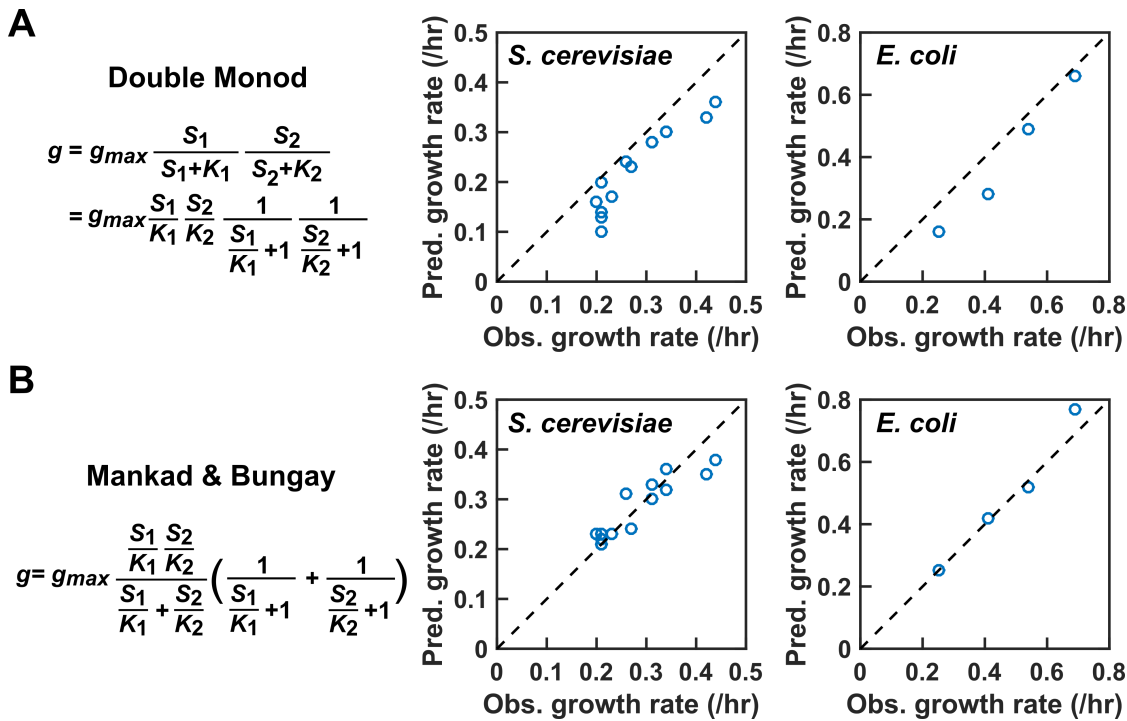

Figure S4: **A comparison of dual-substrate models.** Suppose that cell growth rate depends on each of the two substrates  $S_1$  and  $S_2$  in a Monod-like, saturable fashion. When  $S_2$  is in excess, the  $S_1$  at which half maximal growth rate is achieved is  $K_1$ . When  $S_1$  is in excess, the  $S_2$  at which half maximal growth rate is achieved is  $K_2$ . **(A)** In the “Double Monod” model, growth rate depends on the two limiting substrates in a multiplicative fashion. In the model proposed by Mankad and Bungay **(B)**, growth rate takes a different form. In both models, when one substrate is in excess, growth rate depends on the other substrate in a Monod-fashion. However, when  $\frac{S_1}{K_1} = \frac{S_2}{K_2} = 1$ , the growth rate is predicted to be  $g_{max}/2$  by Mankad & Bungay model, and  $g_{max}/4$  by the Double Monod model. Mankad and Bungay model outperforms the Double Monod model in describing experimental data of *S. cerevisiae* and *E. coli* growing on low glucose and low nitrogen. The figures are plotted using data from Ref. [27].

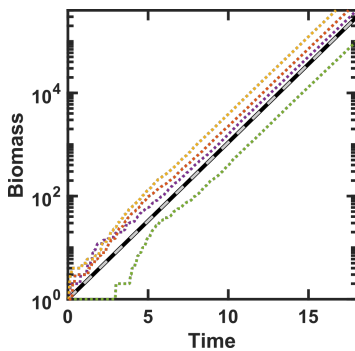

Figure S5: **A comparison of different simulations of exponential cell growth in excess metabolites.** Thick black line: analytical solution with biomass growth rate (0.7/time unit). Grey dashed line: simulation assuming that biomass increases exponentially at 0.7/time unit and that cell division occurs upon reaching a biomass threshold, an assumption used in our model. Color dotted lines: simulations assuming that cell birth is discrete and occurs at a probability equal to the birth rate multiplied with the length of simulation time step ( $\Delta\tau = 0.05$  time unit). When a cell birth occurs, biomass increases discretely by 1, resulting in step-wise increase in color dotted lines at early time.



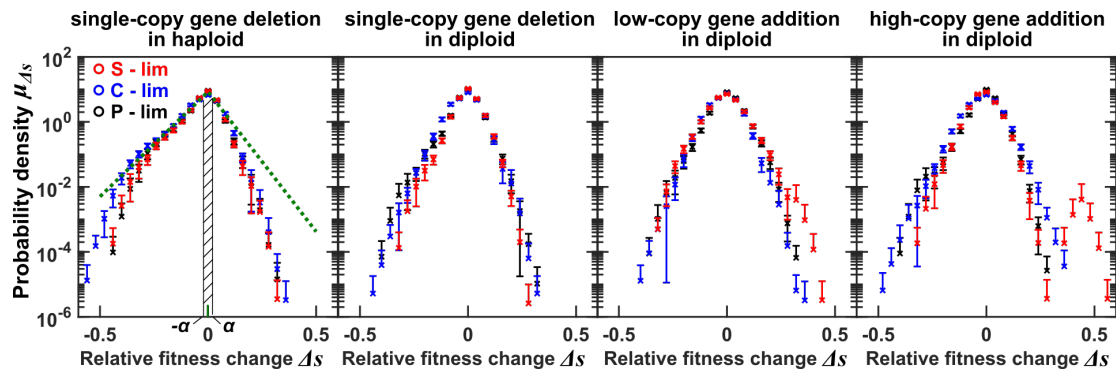

Figure S6: **Probability density functions of changes in relative fitness due to mutations** ( $\mu_{\Delta s}(\Delta s)$ ). We derived  $\mu_{\Delta s}(\Delta s)$  from the Dunham lab data [36] where bar-coded mutant strains were competed under sulfate-limitation (red), carbon-limitation (blue), or phosphate-limitation (black). Error bars represent uncertainty  $\delta\mu_{\Delta s}$  (the lower error bar is omitted if the lower estimate is negative). In the leftmost panel, green lines show non-linear least squared fitting of data to Eq. 19 using all three sets of data. Note that data with larger uncertainty are given less weight, and thus deviate more from the fitting. For an exponentially-distributed probability density function  $p(x) = \exp(-x/r)/r$  where  $x, r > 0$ , the average of  $x$  is  $r$ . When plotted on a semi-log scale, we get a straight line with slope  $1/r$ , and inverting this gets us the average effect  $r$ . From the green line on the right side, we obtain the average effect of enhancing mutations  $s_+ = 0.050 \pm 0.002$ , and from the green line on the left side, we obtain the average effect of diminishing mutations  $s_- = 0.067 \pm 0.003$ . The probability of a mutation altering a phenotype by  $\pm\alpha$  is the area of the hatched region drawn in the leftmost panel.

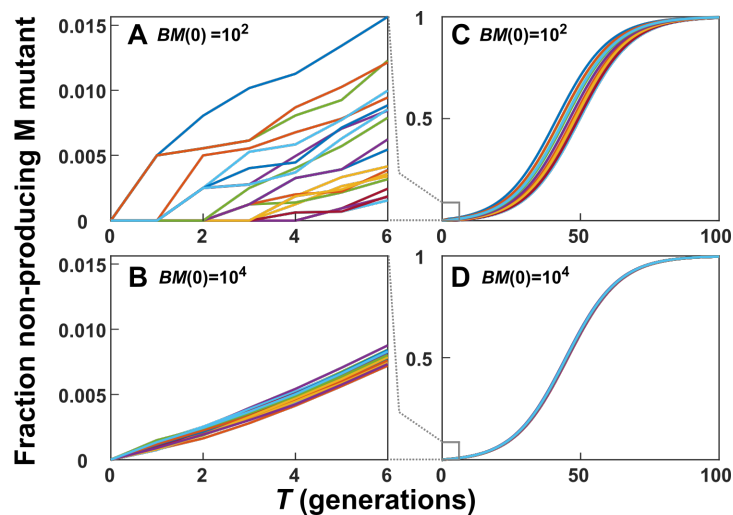

Figure S7: **Large Newborn group size or long maturation time allows non-contributors to accumulate and reduces inter-group variation.** For simplicity, we modeled the growth of Newborn groups of  $M$  cells. From a Newborn biomass of  $10^2$  or  $10^4$  wild-type  $M$  cells,  $M$  population multiplied for 6 or 100 generations. Immediately following cell division, wild-type daughter cells mutated to non-contributors with a probability of  $10^{-3}$ . Wild-type and mutant cells followed exponential growth. The growth rate of wild-type cells was 0.87 times that of mutants. The fraction of biomass made up by mutants at each wild-type doubling is shown. Note the different scales.

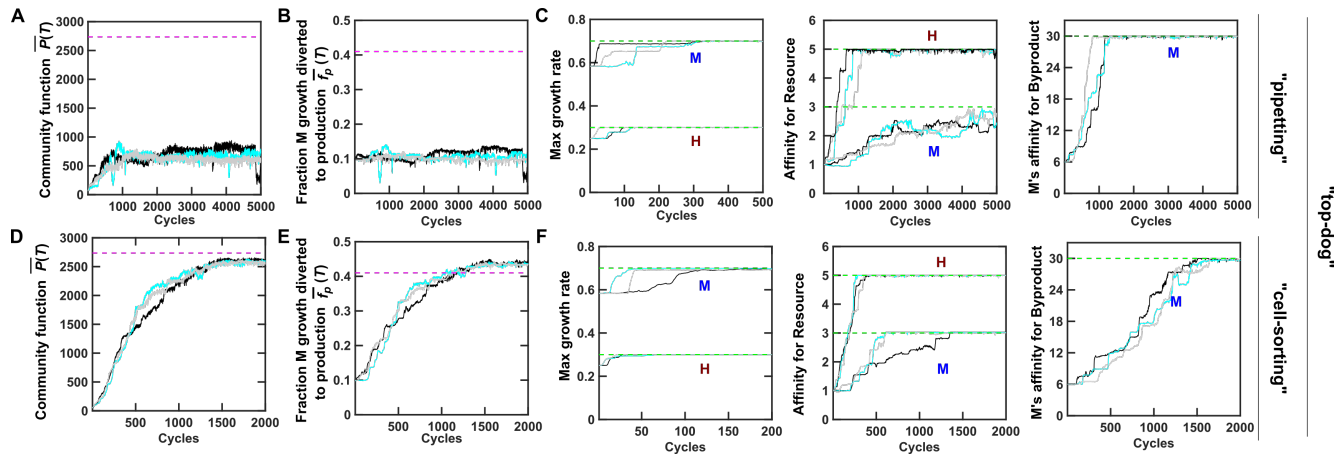

**Figure S8: Improved individual growth can promote community function.** Here, we allowed mutations to alter M's  $f_P$  and H and M's growth parameters. Communities are chosen using the “top-dog” strategy. **(A-C)** Community reproduction via pipetting (i.e. Newborn biomass and species composition can fluctuate). Community function  $P(T)$  increased upon community selection **(A)**. Since  $f_P$  remained unchanged **(B)**, this increase in  $P(T)$  must be due to improved growth parameters **(C)**. **(D-F)** Community reproduction via biomass sorting (i.e. fixed Newborn total biomass and species composition). In both cases, the five growth parameters increased to their respective evolutionary upper bounds (green dashed lines). Magenta dashed lines:  $f_P$  optimal for community function and maximal community function  $P(T)$  when all five growth parameters are fixed at their evolutionary upper bounds and  $\phi_M(0)$  is also optimal for  $P(T)$ . Black, cyan, and gray curves show three independent simulations.  $\bar{P}(T)$  is averaged across chosen Adults.  $\bar{g}_{Mmax}$ ,  $\bar{g}_{Hmax}$ , and  $\bar{f}_P$  are obtained by averaging within each chosen Adult and then averaging across chosen Adults.  $K_{SpeciesMetabolite}$  are averaged within each chosen Adult, then averaged across chosen Adults, and finally inverted to represent average affinity. Note different  $x$  axis scales. The maximal growth rates ( $g_{Mmax}$  and  $g_{Hmax}$ ) have the unit of 1/time. Affinity for Resource ( $1/K_{MR}$ ,  $1/K_{HR}$ ) has the unit of  $1/\bar{R}(0)$ , where  $\bar{R}(0)$  is the initial amount of Resource in Newborn. Affinity for Byproduct ( $1/K_{MB}$ ) has the unit of  $1/\tilde{r}_B$ , where  $\tilde{r}_B$  is the amount of Byproduct released per H biomass produced. Product P has the unit of  $\tilde{r}_P$ , the amount of Product released at the cost of one M biomass. More details on parameters can be found in Table 1.

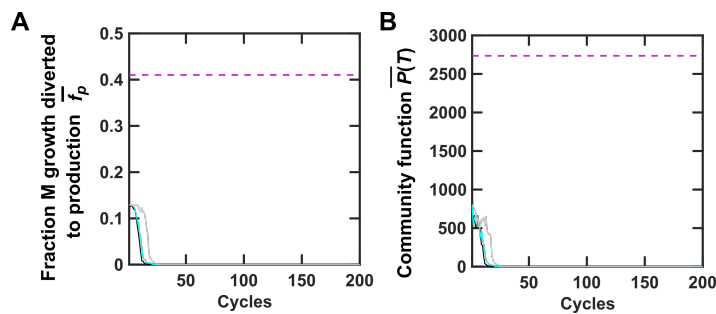

**Figure S9: Community function declines to zero in the absence of inter-community selection for higher community function.** When random Adults were chosen to reproduce (“pipetting”), natural selection favored zero  $f_P$  **(A)**. Consequently,  $P(T)$  decreased to zero **(B)**. Black, cyan and gray curves are three independent simulation trials.  $\bar{P}(T)$  was averaged across the two randomly chosen Adults.  $\bar{f}_P(T)$  was obtained by first averaging among M within each randomly chosen Adult and then averaging across the two randomly chosen Adults.

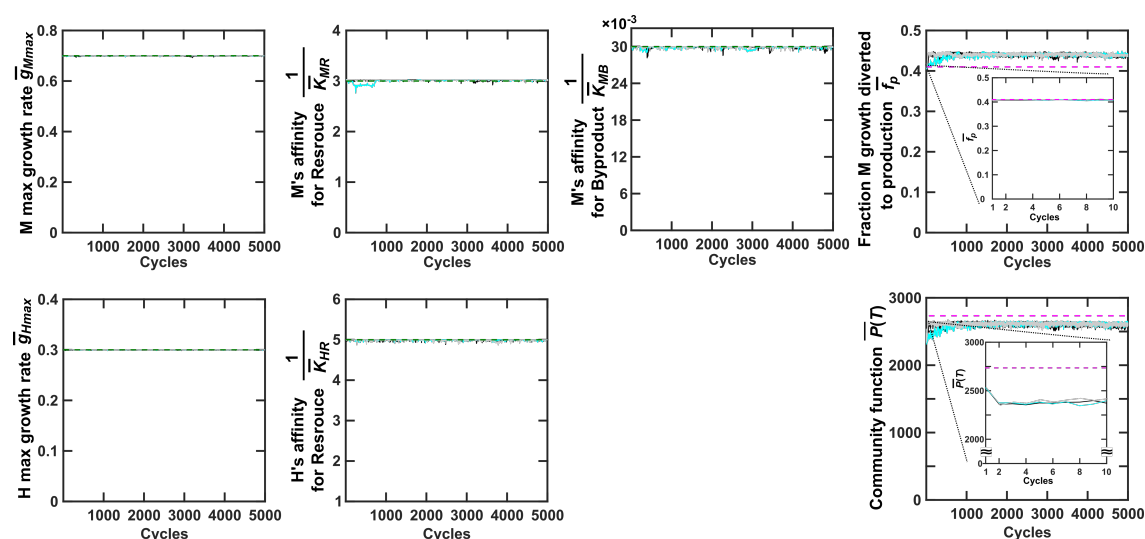

Figure S10:  $P^*(T)$  is a local optimum because it cannot be further improved. We started each Newborn community with total biomass  $BM(0) = 100$ , all five growth parameters at their evolutionary upper bounds, and  $f_P^* = 0.41$  and  $\phi_M^*(0) = 0.54$  to achieve  $P^*(T)$ . We then allowed all five growth parameters and  $f_P$  to mutate while applying community selection. To ensure effective community selection (Figure 3D-F),  $BM(0)$  was fixed to 100, and  $\phi_M(0)$  was fixed to  $\phi_M(T)$  of the chosen Adult community from the previous cycle during community reproduction. We found that all five growth parameters remained at their respective evolutionary upper bounds. At the end of the first cycle (Cycle = 1 in insets), even though  $\bar{f}_P$  did not change,  $\bar{P}(T)$  had already declined from the original magenta dashed line. This is because species interactions have driven  $\phi_M(0)$  from the optimal  $\phi_M^*(0)$  ( $= 0.54$ ) to near the steady state value ( $\phi_M = 0.72$ , compare with  $\phi_{M,SS}$  represented by the green dashed line in Figure 2A bottom panel). Later, over hundreds of cycles,  $\bar{f}_P$  gradually increased while  $\bar{P}(T)$  was still below maximal. This is because species composition gravitated toward steady state  $\phi_{M,SS}$  which deviated from the optimal  $\phi_M^*(0)$  ([64]). Other legends are the same as Figure S8.

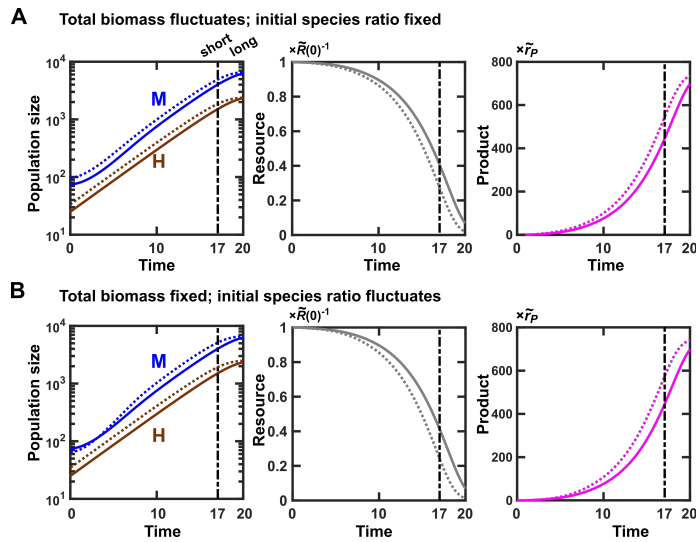

**Figure S11: Variations in community function can arise from non-heritable variations in Newborn compositions.** An average Newborn community (solid lines) has a total biomass of 100 with 75% M. **(A)** A “lucky” Newborn community (dotted lines), by stochastic fluctuations, has a total biomass of 130 with 75% M. Even though the two communities share identical  $f_P = 0.1$ , biomass of M in the Newborn starting with a total biomass of 130 can grow to a higher value (left), deplete more Resource (middle), and make more Product (right) by the end of short  $T$  ( $T = 17$ ). **(B)** A “lucky” Newborn community (dotted lines), by stochastic fluctuations, has a total biomass of 100 with 65% (instead of 75%) M. Even though the two communities share identical  $f_P = 0.1$ , higher fraction of Helper H biomass results in faster accumulation of Byproduct. Consequently, M (dotted) can enjoy a shorter growth lag, grow to a larger size (left), deplete more Resource (middle), and make more Product (right) by the end of short  $T$  ( $T = 17$ ). In both cases, the difference between lucky (dotted) and average (solid) communities is diminished at longer  $T$  ( $T = 20$ ) compared to shorter  $T$  ( $T = 17$ , dash dot line).

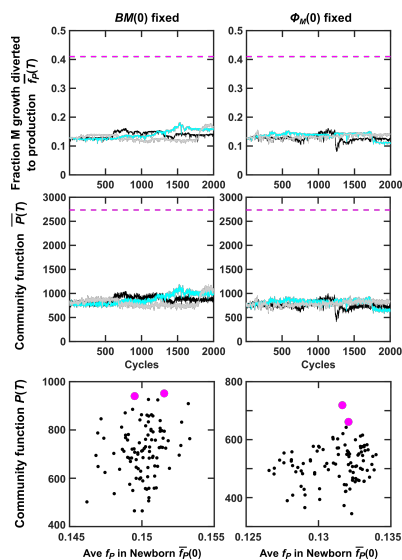

**Figure S12: Fixing either total biomass  $BM(0)$  or fraction of M biomass  $\phi_M(0)$  in Newborns did not significantly improve community selection when using the “top-dog” strategy.** Black, cyan and gray curves are three independent simulation trials.  $\bar{P}(T)$  was averaged across the two chosen Adults.  $\bar{f}_P(T)$  was obtained by first averaging among M within each chosen Adult and then averaging across the two chosen Adults.

### Short T

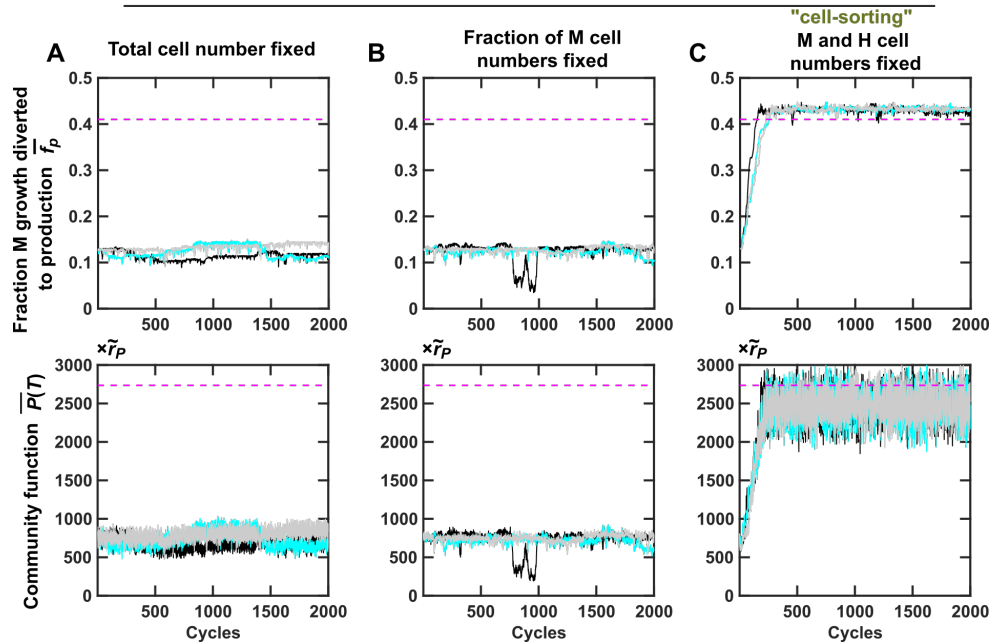

Figure S13: **Fixing H and M cell numbers (instead of biomass) during community reproduction allows short- $T$  selection regimen to improve community function under the “top-dog” strategy.** (A) the total cell number in Newborn communities was fixed to  $\lfloor BM_{target}/1.5 \rfloor$  where  $\lfloor x \rfloor$  means rounding down  $x$  to the nearest integer. (B) The ratio between M and H cell numbers in Newborn communities were fixed to  $I_M(T)/I_H(T)$ , where  $I_M(T)$  and  $I_H(T)$  were the number of M and H cells in the chosen Adult community from the previous cycle, respectively. (C) The total cell numbers of Newborn communities were fixed to  $\lfloor BM_{target}/1.5 \rfloor$  and the ratio between M and H cell numbers were fixed to  $I_M(T)/I_H(T)$ . See Methods Section 6 for details of simulating community reproduction. Black, cyan and gray curves are three independent simulation trials.  $\bar{P}(T)$  was averaged across the two chosen Adults.  $\bar{f}_P(T)$  was obtained by first averaging among M within each chosen Adult and then averaging across the two chosen Adults.

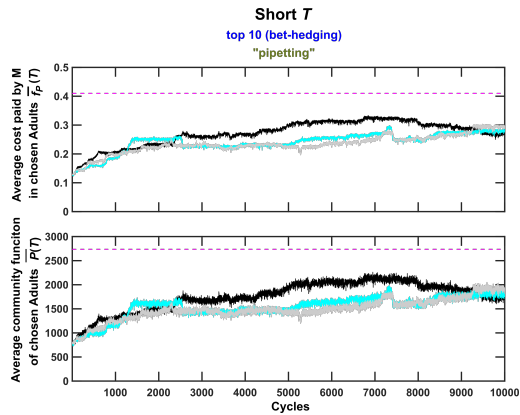

Figure S14: **Bet-hedging can improve selection efficacy when community function experiences non-heritable variations, but not as effectively as reducing non-heritable variations in community function.** Simulation setup is identical to that in Figure 3G-H, except that selection here lasts more cycles. Compared to Figure 3A-C, bet-hedging was more effective. However, compared to Figure 3D-F, bet-hedging did not improve community function to the same extent, even over  $10^4$  cycles. Black, cyan and gray curves are three independent simulation trials.  $\bar{P}(T)$  was averaged across the chosen Adults.  $\bar{f}_P(T)$  was obtained by first averaging among  $M$  within each chosen Adult and then averaging across all chosen Adults.

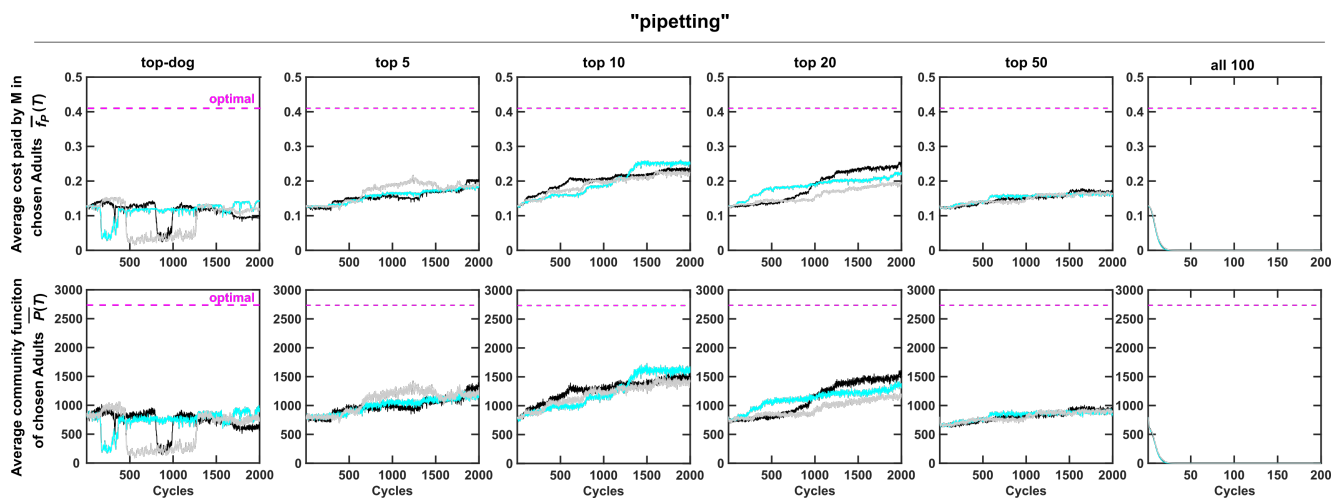

Figure S15: **Bet-hedging strategies promoted community selection under a wide range of selection strengths.** In a bet-hedging strategy, top  $k$  Adults each contributed  $100/k$  Newborns into the next cycle. Here, Adults were reproduced (split) into Newborns via pipetting. When all Adults contributed one Newborn each, selection strength was zero and thus natural selection quickly reduced average  $f_P$  and community function to zero (rightmost column). Black, cyan and gray curves are three independent simulation trials.  $\bar{P}(T)$  was averaged across the two chosen Adults.  $\bar{f}_P(T)$  was obtained by first averaging among  $M$  within each chosen Adult and then averaging across all chosen Adults.

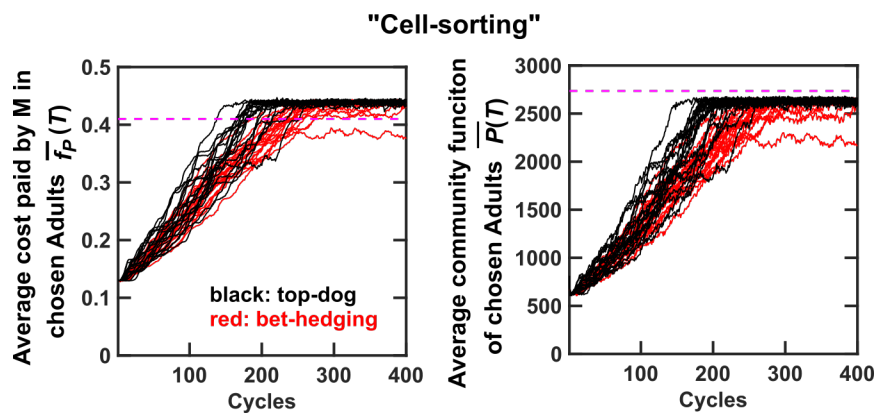

Figure S16: **The “top-dog” strategy is superior to the “bet-hedging” strategy when non-heritable variation in community function is low.** 20 replicas of selection simulations were performed using either the “top-dog” strategy (black curves) or the “bet-hedging” strategy (top ten Adults chosen to reproduce; red curves). Community reproduction was through cell-sorting. Community functions improved slightly faster and to a slightly higher level using the “top-dog” strategy. Thus, when non-heritable variations in community function were suppressed, the “top-dog” strategy was superior to the “bet-hedging” strategy.

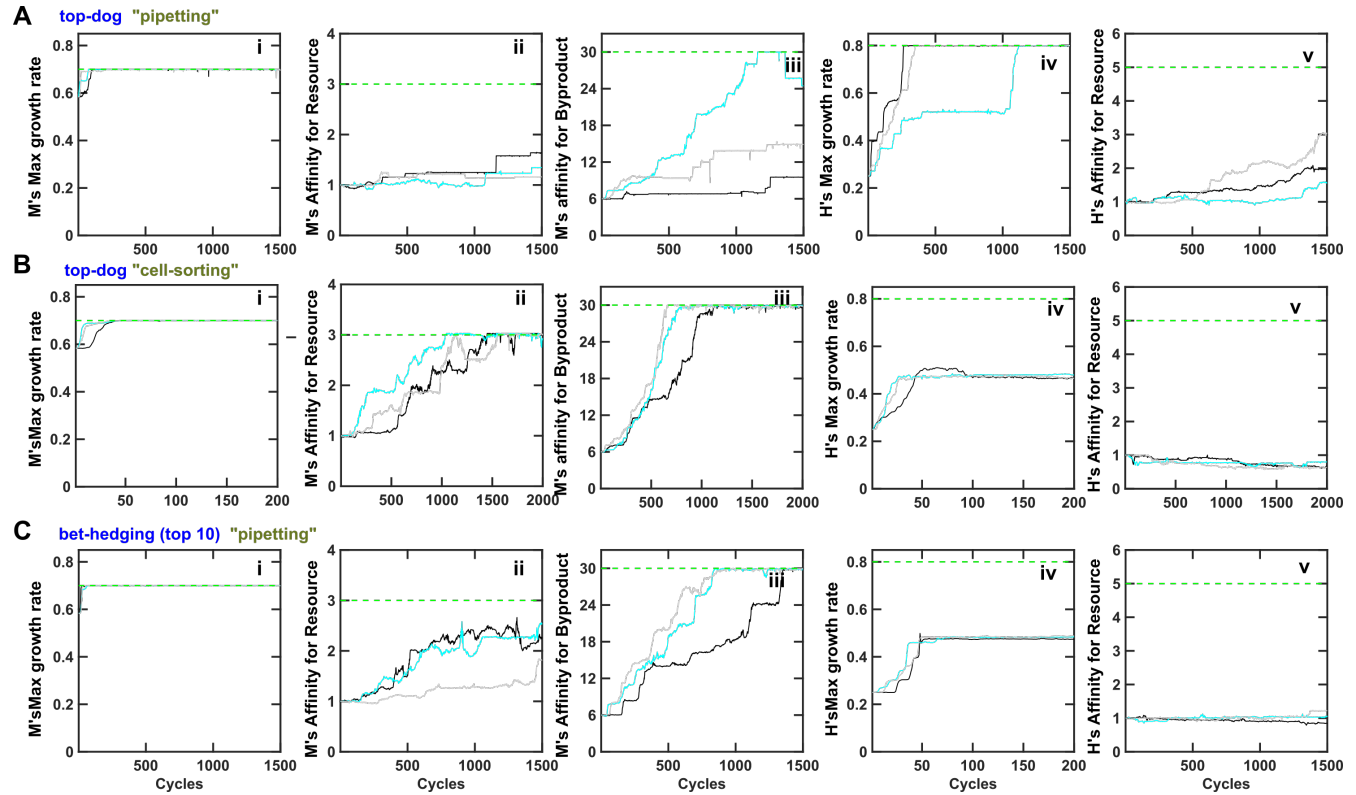

Figure S17: **Community function can be improved even if it is costly to both species.** Identical to Figure 6, the evolutionary upper bound for  $g_{Hmax}$  ( $g_{Hmax}^* = 0.8$ ) was larger than that of  $g_{Mmax}$  ( $g_{Mmax}^* = 0.7$ ), opposite to that in Figure 3. **(A)** Chosen Adult communities were reproduced through pipetting such that both  $BM(0)$  and  $\phi_M(0)$  could stochastically fluctuate. Eventually,  $g_{Hmax}$  and  $g_{Mmax}$  evolved to their respective upper bounds, and thus  $g_{Hmax} > g_{Mmax}$  (compare **i** and **iv**). This would ordinarily lead to extinction of M. However, community selection managed to maintain M at a very low level (Figure 6A bottom panel). **(B, C)** Adult communities were chosen using the top-dog strategy and reproduced through cell biomass sorting **(B)** or chosen using the bet-hedging strategy and reproduced through pipetting **(C)**. Community selection worked in the sense that both  $\bar{f}_P$  and  $P(T)$  improved over cycles (Figure 6). Strikingly, the maximal growth rate of H  $g_{Hmax}$  did not increase to its upper bound  $g_{Hmax}^* = 0.8$ , and H's affinity for Resource even decreased from the ancestral level in some cases. Here, Resource supplied to Newborn communities could support  $10^5$  total biomass to accommodate faster growth rate. Other legends are the same as Figure S8.



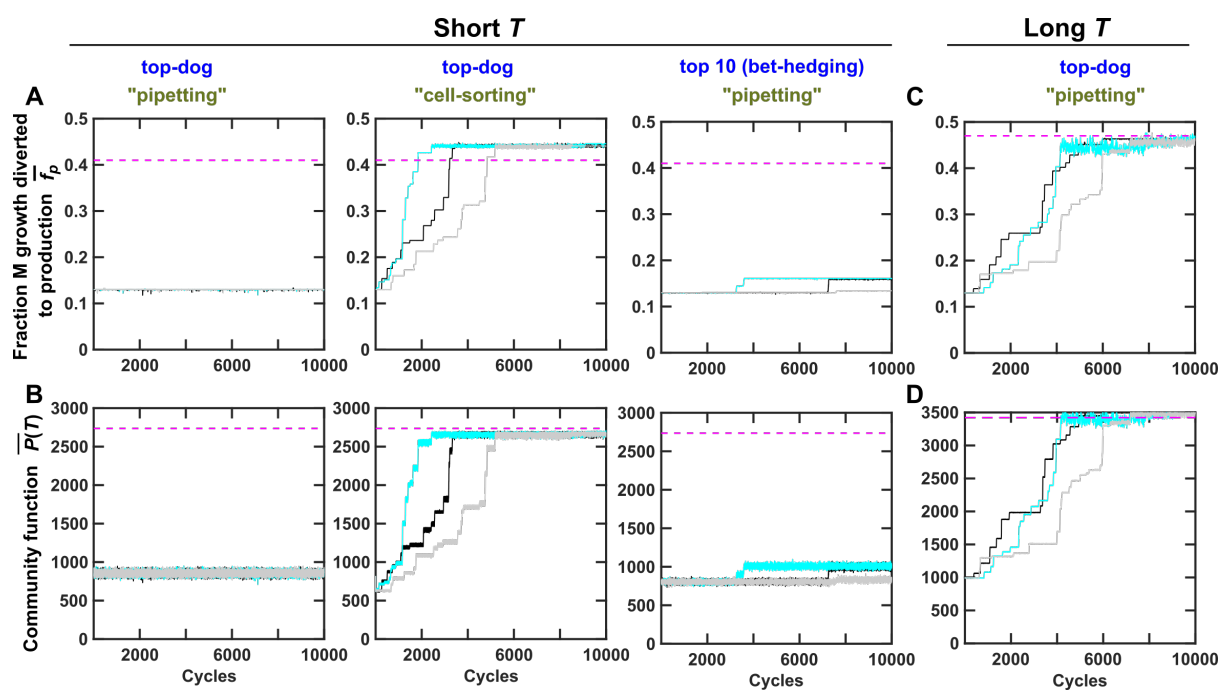

Figure S18: **Evolution dynamics of chosen Adult communities at a mutation rate of  $2 \times 10^{-5}$  per cell per generation.** (A, B) At short maturation time ( $T = 17$ , Resource was not exhausted in an average community), fixing both  $BM(0)$  and  $\phi_M(0)$  ("cell-sorting") improved community function. The bet-hedging strategy slightly improved community function. (C, D) At long maturation time ( $T = 20$ , Resource was nearly exhausted in an average community), community function improved without fixing  $BM(0)$  or  $\phi_M(0)$ . At this mutation rate, because the population size of a community never exceeds  $10^4$ , a mutation occurs on average every 5 cycles, resulting in step-wise improvement in both  $\bar{f}_p(T)$  and  $\bar{P}(T)$ . Black, cyan and gray curves are three independent simulation trials.  $\bar{P}(T)$  was averaged across all chosen Adults.  $\bar{f}_p(T)$  was obtained by first averaging among  $M$  within each chosen Adult and then averaging across all chosen Adults.

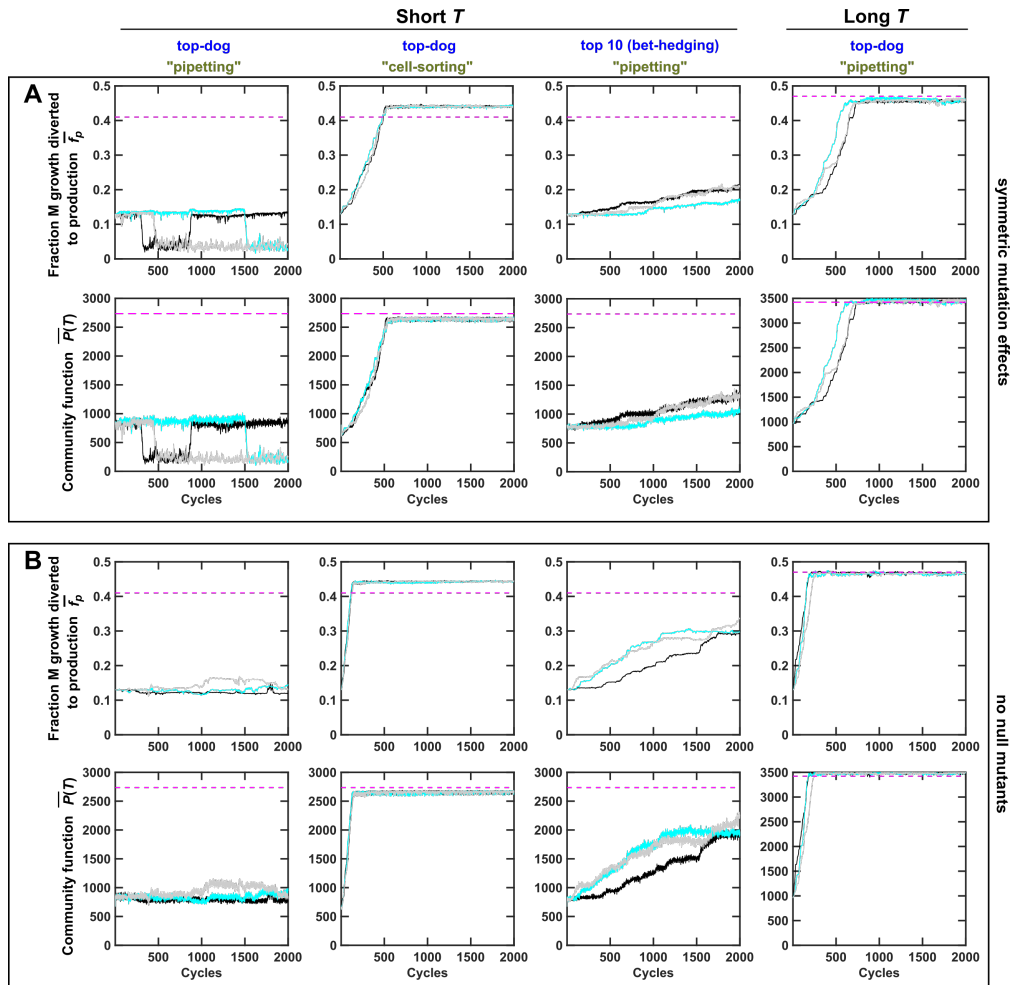

Figure S19: **Evolutionary dynamics of chosen Adult communities under different distributions of mutation effects.** (A) Evolutionary dynamics where half of the mutations reduced  $f_P$  to zero and the distribution of mutation effects of the other half is specified by Eq. 19 where  $s_+ = s_- = 0.02$  are constants. (B) Evolutionary dynamics when null mutations in  $f_P$  did not occur. The distribution of mutation effects is thus similar to that used in Figure 3, except that the null mutations were eliminated. Specifically, the distribution of mutation effects is specified by Eq. 19 where  $s_+ = 0.05$  and  $s_- = 0.067$ .  $\bar{f}_P$  as well as  $\bar{P}(T)$  were more stable compared to those in Figure 3. Black, cyan and gray curves are three independent simulation trials.  $\bar{P}(T)$  was averaged across the chosen Adults.  $\bar{f}_P(T)$  was obtained by first averaging among  $M$  within each chosen Adult and then averaging across all chosen Adults.

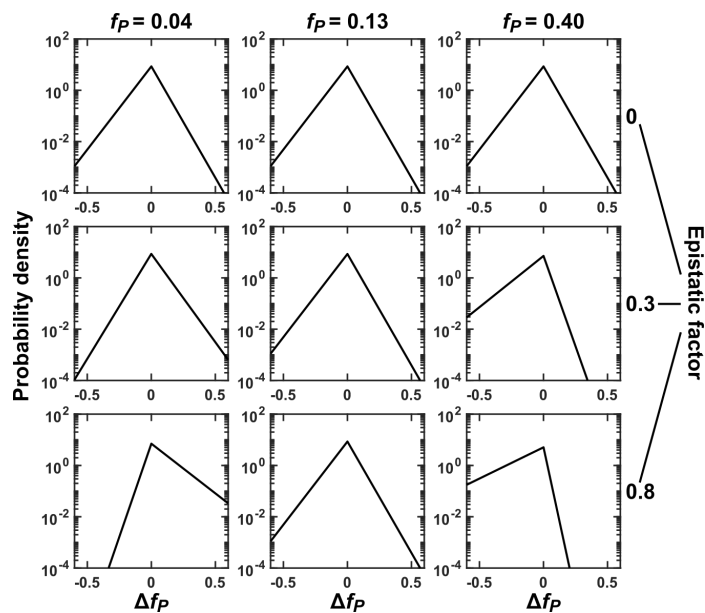

Figure S20: **Mutation effects under epistasis.** Distribution of mutation effects at different current  $f_P$  values (marked on top) are plotted. (Top) When there is no epistasis, distribution of mutational effects on  $f_P$  ( $\Delta f_P$ ) are identical regardless of current  $f_P$ . (Middle and Bottom) With epistasis (see Methods Section 5 for definition of epistasis factor), mutational effects on  $f_P$  depend on the current value of  $f_P$ . If current  $f_P$  is low (left), enhancing mutations are more likely to occur (the area to the right of  $\Delta f_P = 0$  becomes bigger) and their mean mutational effect becomes larger (mean=1/slope becomes larger due to smaller slope), while diminishing mutations are less likely to occur and their mean mutational effect is smaller. If current  $f_P$  is high (right), the opposite is true.

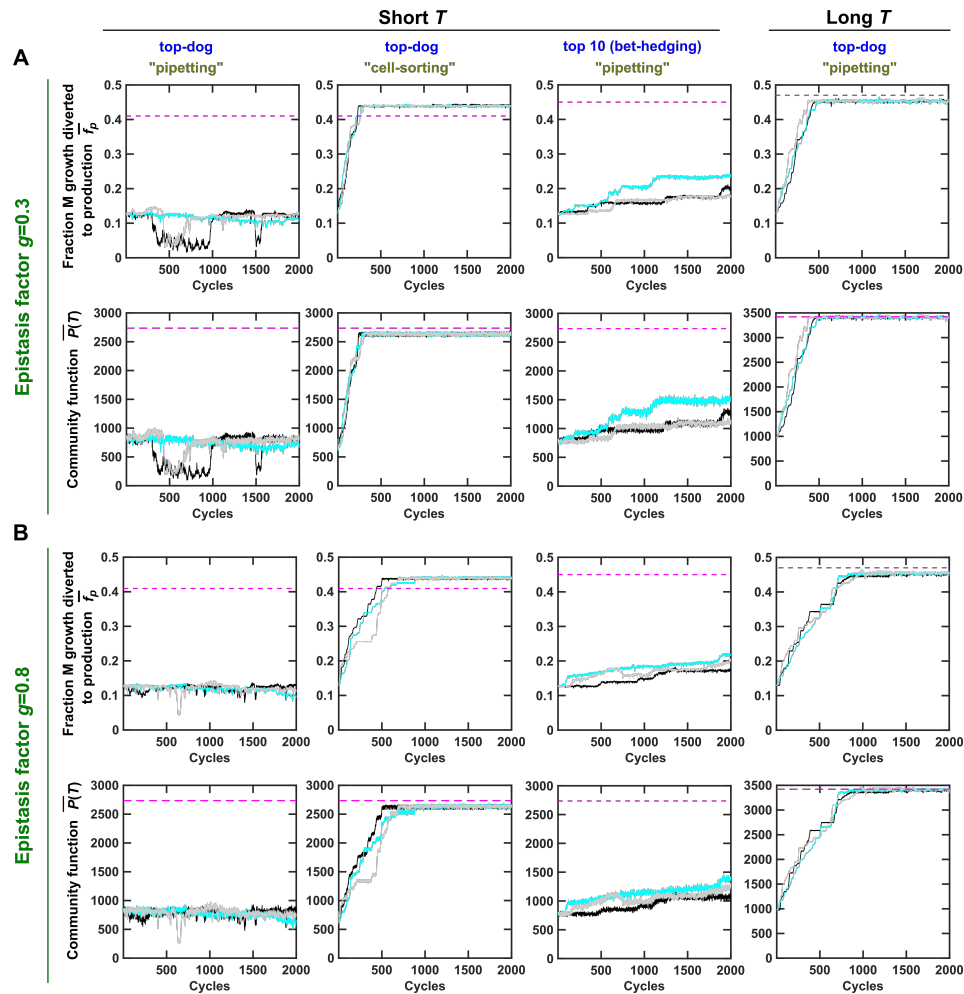

Figure S21: **Evolutionary dynamics of chosen Adults when epistasis is considered.** When we incorporated different epistasis strengths (epistasis factor of 0.3 and 0.8), we obtained essentially the same conclusions as when epistasis was not considered (Figure 3). Other legend details can be found in Figure 3.

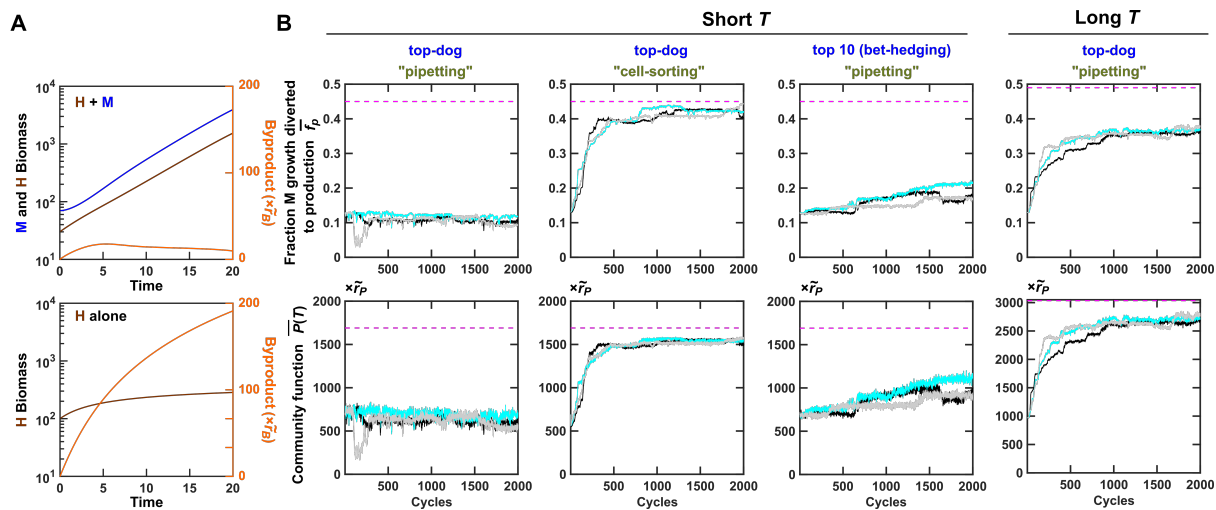

Figure S22: **Selection dynamics of mutualistic H-M communities.** In the mutualistic H-M community, H generates Byproduct which is essential for M but inhibitory to H. **(A)** H can grow to a high density in the presence of M (top) but not in the absence of M (bottom). **(B)** Similar to community selection on commensal H-M communities, selection was promoted by bet-hedging or cell-sorting at short  $T$  ( $T = 17$ ), or via extending  $T$  ( $T = 20$ ). Black, cyan and gray curves are three independent simulation trials.  $\bar{P}(T)$  was averaged across the chosen Adults.  $\bar{f}_P(T)$  was obtained by first averaging among M within each chosen Adult and then averaging across all chosen Adults.

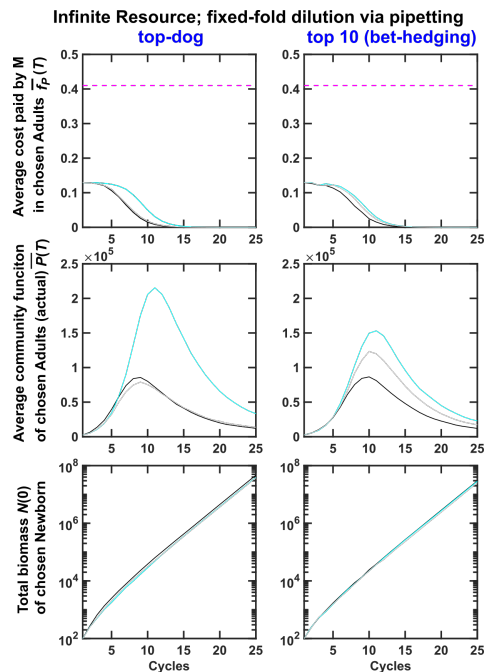

Figure S23: **Artificial selection on community function in excess Resource failed under fixed-fold pipetting dilution scheme.** Excess Resource was supplied to each Newborn ( $R(0)/K_{MR} = 10^6$ ), and chosen Adults were reproduced via a fixed-fold (100-fold) pipetting dilution into Newborns. Because of pipetting, Newborns with larger total biomass will tend to be selected (Figure 4F). Community selection quickly failed as Newborn total biomass increased exponentially (bottom) while non-producing M cells with  $f_P = 0$  quickly took over (top; Figure S7B). Black, cyan and gray curves are three independent simulation trials.  $\bar{P}(T)$  was averaged across chosen Adults.  $\bar{f}_P(T)$  was obtained by first averaging among M within each chosen Adult and then averaging across all chosen Adults.

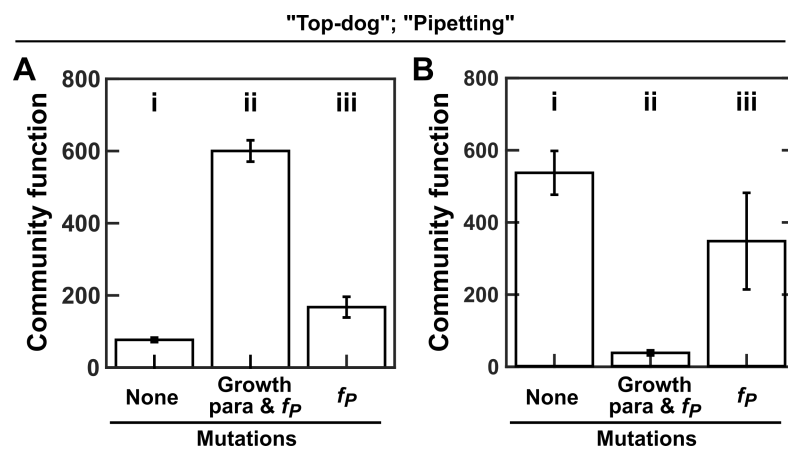

Figure S24: **Improving growth can improve or impair community function, depending on evolutionary upper bounds of growth parameters.** Plotted here are plateaued community function after 1500 cycles when simulation did or did not allow mutations in growth parameters or  $f_P$ . **(A)** When evolutionary upper bound for  $g_{Hmax}$  ( $g_{Hmax}^* = 0.3$ ) was lower than that of  $g_{Mmax}$  ( $g_{Mmax}^* = 0.7$ ), improving growth parameters improved community function. Compared to community function where no mutations were allowed (i), community function improved when growth parameters and  $f_P$  were allowed to mutate (ii). Preventing mutations in growth parameters diminished community function improvement (iii). In this case, improved growth of M and H resulted in higher community function. Evolutionary dynamics are shown in Figure S8C. **(B)** When evolutionary upper bound for  $g_{Hmax}$  ( $g_{Hmax}^* = 0.8$ ) was larger than that of  $g_{Mmax}$  ( $g_{Mmax}^* = 0.7$ ), improving growth parameters could decrease community function. Compared to community function where no mutations were allowed (i), community function decreased when growth parameters and  $f_P$  were allowed to mutate (ii). Preventing mutations in growth parameters diminished reduction in community function (iii). In this case, improved growth of M and H resulted in lower community function. Evolutionary dynamics are shown in Figure S17A. In **B**, Resource supplied to Newborn communities could support  $10^5$  total biomass to accommodate faster growth rate. In both **A** and **B**, community reproduction occurred through volumetric dilution via pipetting, and the top-dog strategy was used. Error bars are calculated from three independent selections.

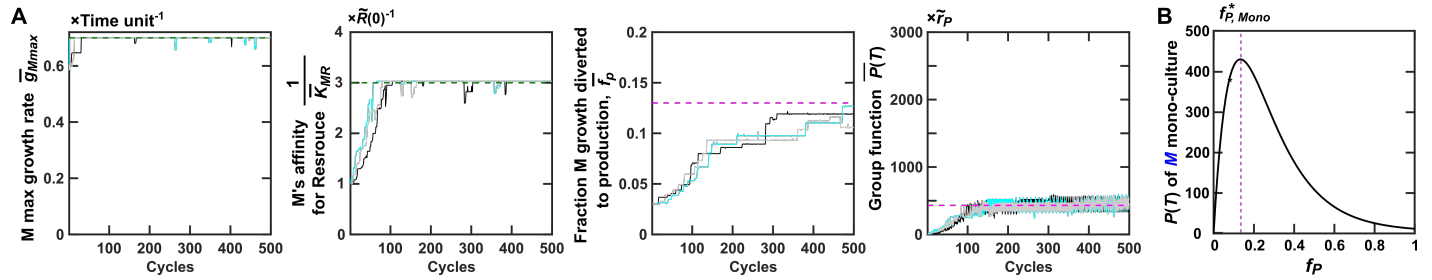

Figure S25: **Selection dynamics of M mono-species groups.** (A) Phenotypes averaged over chosen groups are plotted for 500 selection cycles. Because Byproduct is in excess,  $K_{MB}$  terms are no longer relevant in equations (Figure S4,  $R_M \ll B_M$ ). Upper bounds of  $g_{Mmax}$  and  $1/K_{MR}$  are marked with green dashed lines. Magenta lines mark  $f_P$  optimal for group function and maximal  $P(T)$  when  $g_{Mmax}$  and  $1/K_{MR}$  are fixed at their upper bounds and when Byproduct is in excess. (B) Suppose that a Newborn M group starts with a single Manufacturer (biomass 1) supplied with excess Byproduct and the same amount of Resource as in a Newborn H-M community ( $\tilde{R}(0)$  could support  $10^4$  M biomass). Then, maximal group function is achieved at  $f_P = f_{P, Mono}^* = 0.13$  (dashed line), lower than the optimal  $f_P$  for the community function  $f_P^* = 0.41$  (Figure 2B). Here, the growth parameters of M are all fixed at their evolutionary upper bounds and  $P(T)$  has the unit of  $\tilde{r}_P$ .

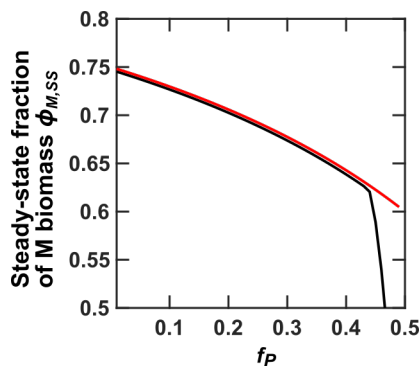

Figure S26: Comparison between the steady-state  $\phi_{M,SS}$  calculated from Eqs. 6-10 (black curve) and from Eq. 14 (red line).



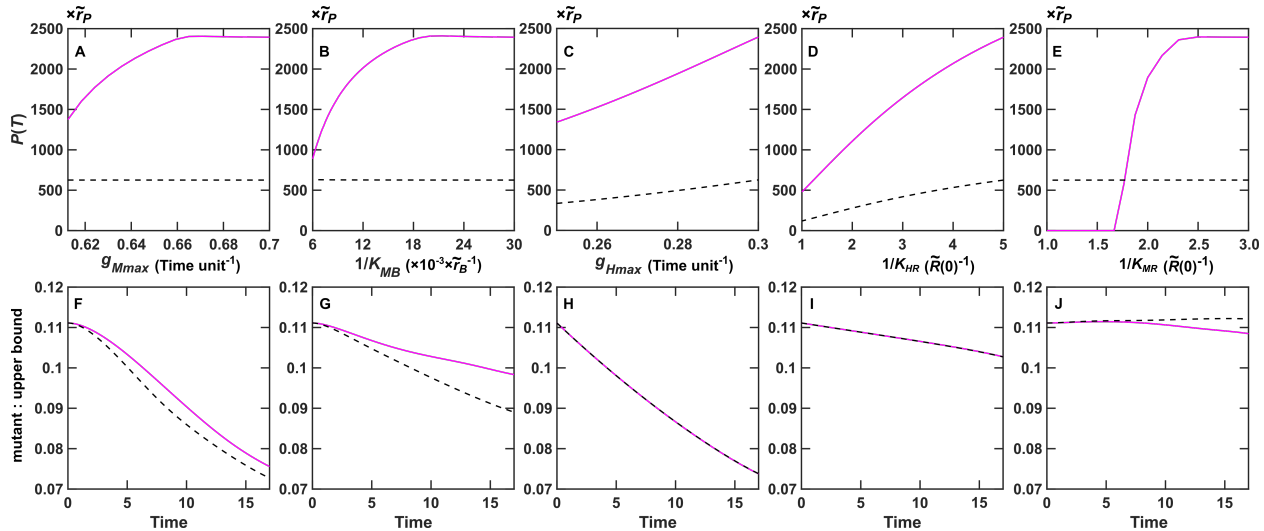

**Figure S27: Improved maximal growth rates and nutrient affinities generally, but do not always, improve individual fitness and community function.** In all figures, solid and dashed lines respectively represent calculations with  $f_P = f_P^* = 0.41$  (optimal for community function; Figure 2B) and  $f_P = f_{P, Mono}^* = 0.13$  (optimal for M monoculture production when Byproduct is in excess; Figure S25). Except for the indicated growth parameter, all other growth parameters were set to their respective upper bounds. Dynamics within one selection cycle is plotted. **(A-D)** Community function increases as the indicated growth parameter increases. For example in **(A)**, all growth parameters except for  $g_{Mmax}$  were set to their upper bounds. For each  $g_{Mmax}$ , the steady-state  $\phi_{M,SS}$  was calculated using equations in Methods Section 1. This steady-state  $\phi_{M,SS}$  was then used to calculate  $P(T)$ . **(F-I)** The ratio between mutant population (whose indicated growth parameter was 10% lower than the upper bound) and growth-adapted population over maturation time  $T = 17$ . The decreasing ratio indicates that the mutant has a lower fitness compared to the growth-adapted cells. For example in **(F)**, a Newborn community had 70 M and 30 H. 90% of M were growth-adapted and had upper bound  $g_{Mmax} = 0.7$  (“upper bound”). 10% of M had  $g_{Mmax} = 0.63$ , 10% less than the upper bound (“mutant”). The ratio between “mutant” and “upper bound” cells declined over maturation time, indicating that mutant M cells had a lower fitness. **(E, J)** When  $f_P = 0.13$  (black dashed line) but not when  $f_P = 0.41$  (magenta line), increasing M’s affinity for Resource ( $1/K_{MR}$ ) slightly decreases individual fitness, and barely affects community function.

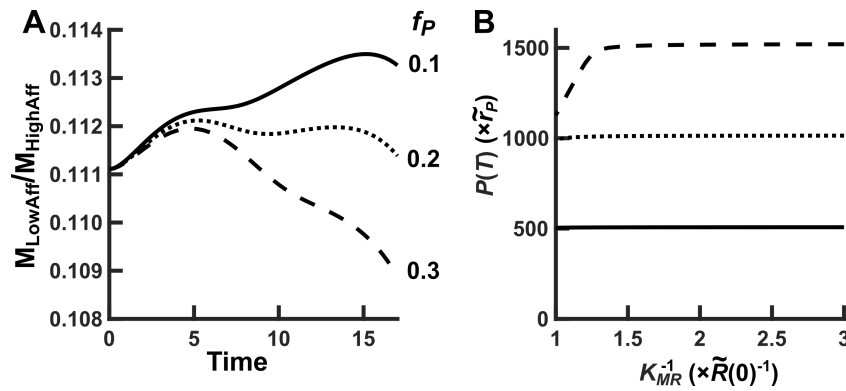

Figure S28: **At low  $f_P$ , M's lower affinity for Resource can increase its growth rate.** (A) The ratio between  $M_{\text{LowAff}}$  (the population size of M with low affinity for Resource  $K_{MR}^{-1} = 2.5\tilde{R}(0)^{-1}$ ) and  $M_{\text{HighAff}}$  (the population size of M with high affinity for Resource  $K_{MR}^{-1} = 3\tilde{R}(0)^{-1}$ ) when their  $f_P$  is equal to 0.1 (solid line), 0.2 (dotted line) and 0.3 (dashed line) are plotted over one maturation cycle when grown together in the H-M community. (B)  $P(T)$  improves over increasing affinity  $K_{MR}^{-1}$  when  $f_P$  is 0.1 (solid line), 0.2 (dotted line) and 0.3 (dashed line). The dependence of  $P(T)$  on  $K_{MR}^{-1}$  is rather weak for low  $f_P$ . For example, when  $K_{MR}^{-1}$  increases from 1 to 3,  $P(T)$  increases by only 2% and 0.6% for  $f_P = 0.2$  and  $f_P = 0.1$ , respectively.

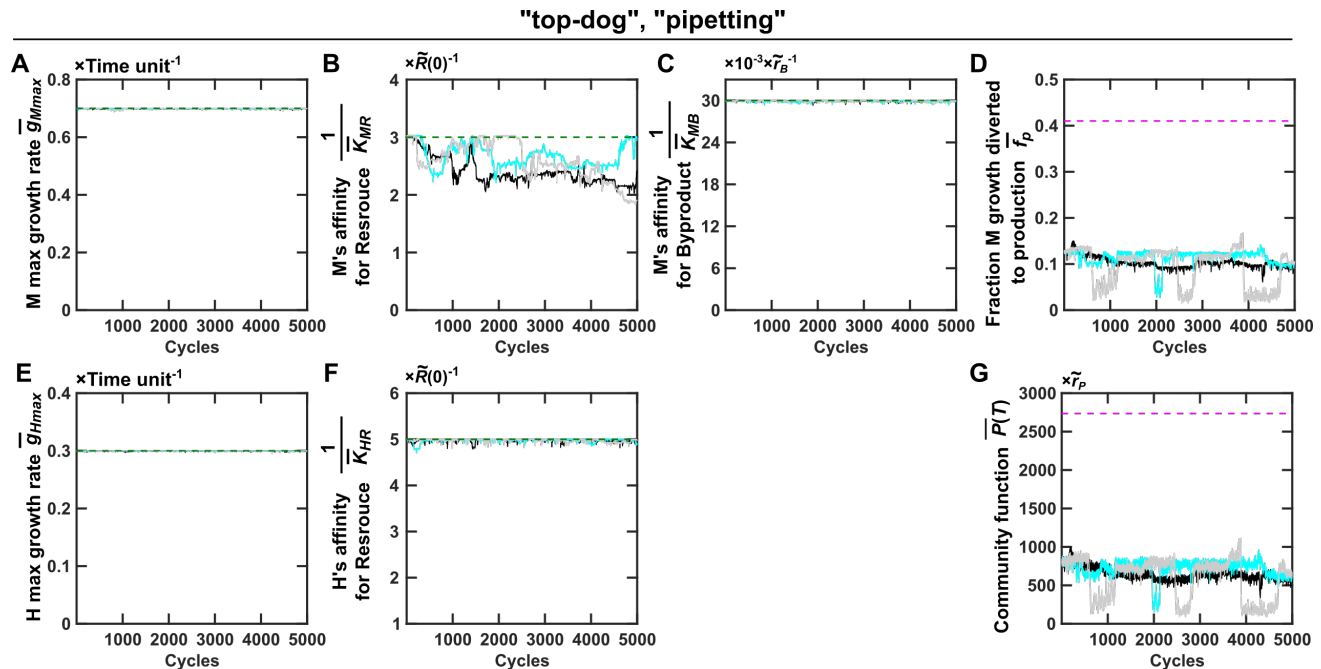

Figure S29: **Selection dynamics of communities of mono-adapted H and M when allowing all parameters to vary.** In the Newborn communities of the first cycle of community selection, all growth parameters of H and M were at their upper bounds and  $f_P = f_{P, Mono}^* = 0.13$  (Figure S25). When we simulated community selection while allowing all growth parameters and  $f_P$  to vary, M's affinity for R  $1/\bar{K}_{MR}$  decreased slightly because at low  $f_P = 0.13$ , M with a lower affinity for R (lower  $1/\bar{K}_{MR}$ ) has a slightly improved individual fitness (Figure S28). Other growth parameters ( $\bar{g}_{Mmax}$ ,  $\bar{g}_{Hmax}$ ,  $1/\bar{K}_{MB}$  and  $1/\bar{K}_{HR}$ ) remain mostly constant during community selection because mutants with lower-than-maximal values were selected against by intra-community selection and by inter-community selection (Figure S27). Other legends are the same as Figure S8.

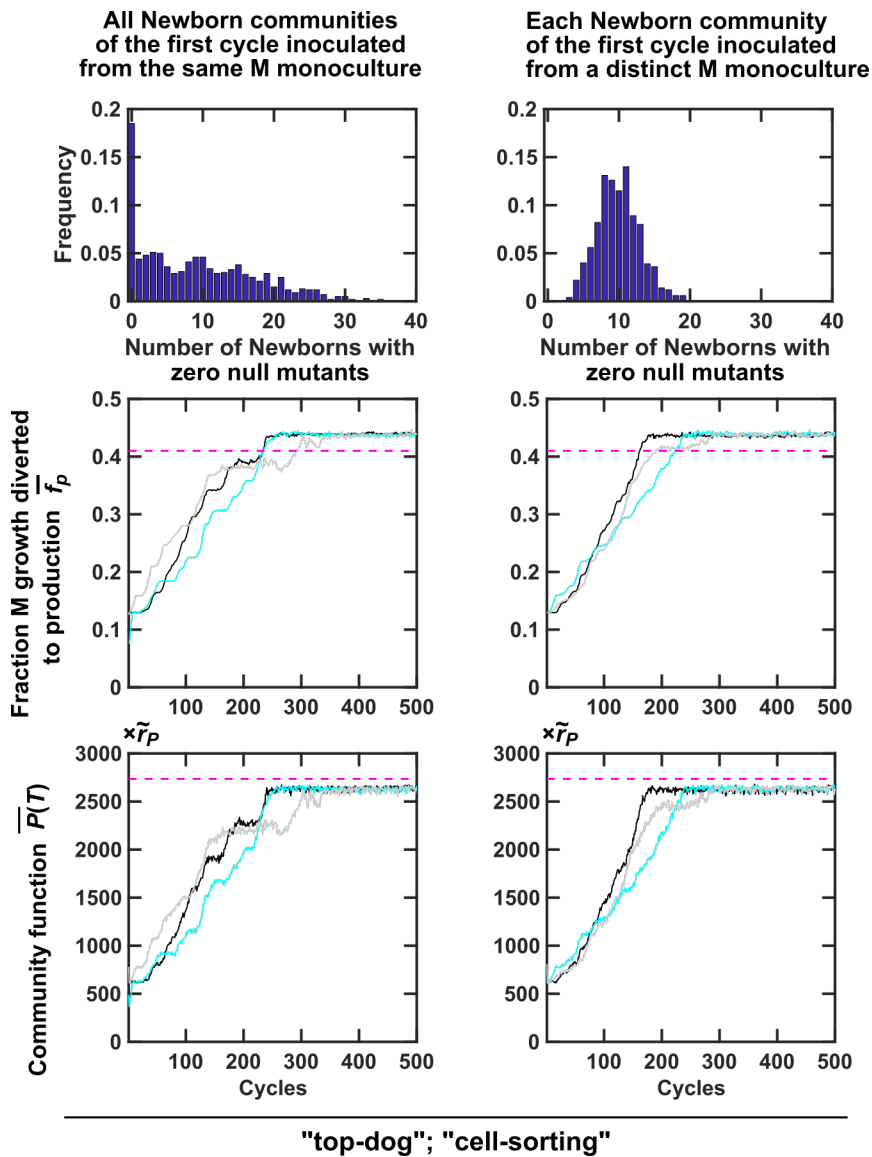

Figure S30: **Different methods of pre-growth had limited impact on selection dynamics.** (Top Panels) Histograms of the number of Newborn communities free of non-contributor M mutants when Newborn communities of the first cycle were inoculated from a single M monoculture (**Left panel**) or from independently-grown M monocultures (**Right panel**). To generate the histograms, the pre-growth and inoculation process was repeated 100 times. (**Middle and Bottom panels**) Improvement in  $\bar{f}_P(T)$  and  $\bar{P}(T)$  was only slightly slower when Newborn communities from the first cycle were inoculated by the same M monoculture (**Left panel**) than by distinct monocultures (**Right panel**). Here we assumed that each M monoculture grew from a single non-null M cell. This M cell went through  $\sim 23$  doublings and therefore multiplied into  $\sim 10^7$  cells. Every time a non-null M cell divides, the mother and daughter cells can independently mutate and become a null M cell ( $f_P = 0$ ) at a fixed probability of  $10^{-3}$ . If a non-null M cell has  $f_P = 0.13$ , then it will grow at a rate 87% of that of a null cell. After  $\sim 23$  doublings, the M monocultures have on average  $\sim 3\%$  null mutants. 60 randomly-chosen M cells from the same monoculture or from distinct monocultures, together with 40 H cells, were used to inoculate each of the 100 Newborns for the first selection cycle. The top-dog strategy was used to choose Adults which were then reproduced via cell-sorting. Black, cyan and gray curves are three independent simulation trials.  $\bar{P}(T)$  was averaged across the two chosen Adults.  $\bar{f}_P(T)$  was obtained by first averaging among M within each chosen Adult and then averaging across the two chosen Adults.

## References

1021

- 1022 [1] Trevor D. Lawley, Simon Clare, Alan W. Walker, Mark D. Stares, Thomas R. Connor, Claire  
1023 Raisen, David Goulding, Roland Rad, Fernanda Schreiber, Cordelia Brandt, Laura J. Deakin,  
1024 Derek J. Pickard, Sylvia H. Duncan, Harry J. Flint, Taane G. Clark, Julian Parkhill, and Gordon  
1025 Dougan. Targeted restoration of the intestinal microbiota with a simple, defined bacteriotherapy  
1026 resolves relapsing *Clostridium difficile* disease in mice. *PLoS pathogens*, 8(10):e1002995, 2012.
- 1027 [2] Stefanie Widder, Rosalind J. Allen, Thomas Pfeiffer, Thomas P. Curtis, Carsten Wiuf, William T.  
1028 Sloan, Otto X. Cordero, Sam P. Brown, Babak Momeni, Wenying Shou, Helen Kettle, Harry J.  
1029 Flint, Andreas F. Haas, Béatrice Laroche, Jan-Ulrich Kreft, Paul B. Rainey, Shiri Freilich, Stefan  
1030 Schuster, Kim Milferstedt, Jan R. van der Meer, Tobias Großkopf, Jef Huisman, Andrew Free,  
1031 Cristian Picioreanu, Christopher Quince, Isaac Klapper, Simon Labarthe, Barth F. Smets, Harris  
1032 Wang, Isaac Newton Institute Fellows, and Orkun S. Soyer. Challenges in microbial ecology:  
1033 building predictive understanding of community function and dynamics. *The ISME Journal*, March  
1034 2016. 00001.
- 1035 [3] Stephen R. Lindemann, Hans C. Bernstein, Hyun-Seob Song, Jim K. Fredrickson, Matthew W.  
1036 Fields, Wenying Shou, David R. Johnson, and Alexander S. Beliaev. Engineering microbial consortia  
1037 for controllable outputs. *The ISME Journal*, 10(9):2077–2084, September 2016.
- 1038 [4] Jian Zhou, Qian Ma, Hong Yi, Lili Wang, Hao Song, and Ying-Jin Yuan. Metabolome profiling  
1039 reveals metabolic cooperation between *Bacillus megaterium* and *Ketogulonigenium vulgare* during  
1040 induced swarm motility. *Applied and Environmental Microbiology*, 77(19):7023–7030, October  
1041 2011. 00038.
- 1042 [5] R. E. Wheatley. The consequences of volatile organic compound mediated bacterial and fungal  
1043 interactions. *Antonie van Leeuwenhoek*, 81(1-4):357–364, December 2002. 00123.
- 1044 [6] Kwang-sun Kim, Soohyun Lee, and Choong-Min Ryu. Interspecific bacterial sensing through  
1045 airborne signals modulates locomotion and drug resistance. *Nature Communications*, 4:1809,  
1046 2013.
- 1047 [7] Matthew F Traxler, Jeramie D Watrous, Theodore Alexandrov, Pieter C Dorrestein, and Roberto  
1048 Kolter. Interspecies interactions stimulate diversification of the *Streptomyces coelicolor* secreted  
1049 metabolome. *mBio*, 4(4), 2013.
- 1050 [8] Richard F Gunst and Robert L Mason. Fractional factorial design. *Wiley Interdisciplinary Reviews:*  
1051 *Computational Statistics*, 1(2):234–244, 2009.
- 1052 [9] Yuancai Chen, Che-Jen Lin, Gavin Jones, Shiyu Fu, and Huaiyu Zhan. Enhancing biodegradation of  
1053 wastewater by microbial consortia with fractional factorial design. *Journal of hazardous materials*,  
1054 171(1-3):948–953, 2009.
- 1055 [10] William Swenson, David Sloan Wilson, and Roberta Elias. Artificial ecosystem selection. *Proceed-*  
1056 *ings of the National Academy of Sciences*, 97:9110–9114, 2000.
- 1057 [11] W. Swenson, J. Arendt, and D.S. Wilson. Artificial selection of microbial ecosystems for 3-  
1058 chloroaniline biodegradation. *Environ Microbiol*, 2(5):564–71, October 2000.

- 1059 [12] Hywel T. P. Williams and Timothy M. Lenton. Artificial selection of simulated microbial ecosys-  
1060 tems. *Proceedings of the National Academy of Sciences*, 104(21):8918–8923, May 2007. 00036.
- 1061 [13] Kevin Panke-Buisse, Angela C Poole, Julia K Goodrich, Ruth E Ley, and Jenny Kao-Kniffin.  
1062 Selection on soil microbiomes reveals reproducible impacts on plant function. *The ISME journal*,  
1063 9(4):980, 2015.
- 1064 [14] Ulrich G Mueller, Thomas Juenger, Melissa Kardish, Alexis Carlson, Kathleen Burns, Chad Smith,  
1065 and David De Marais. Artificial microbiome-selection to engineer microbiomes that confer salt-  
1066 tolerance to plants. *bioRxiv*, page 081521, 2016.
- 1067 [15] Charles J Goodnight. The influence of environmental variation on group and individual selection  
1068 in a cress. *Evolution*, 39(3):545–558, 1985.
- 1069 [16] Mitch D Day, Daniel Beck, and James A Foster. Microbial communities as experimental units.  
1070 *Bioscience*, 61(5):398–406, 2011.
- 1071 [17] U. G. Mueller and J. L. Sachs. Engineering Microbiomes to Improve Plant and Animal Health.  
1072 *Trends in Microbiology*, 23(10):606–617, October 2015.
- 1073 [18] A. Cramer, E. A. Whitehorn, E. Tate, and W. P. Stemmer. Improved green fluorescent protein by  
1074 molecular evolution using DNA shuffling. *Nature Biotechnology*, 14(3):315–319, March 1996.
- 1075 [19] Manfred T. Reetz and José Daniel Carballeira. Iterative saturation mutagenesis (ISM) for rapid  
1076 directed evolution of functional enzymes. *Nature Protocols*, 2(4):891–903, April 2007.
- 1077 [20] Eric T. Boder, Katarina S. Midelfort, and K. Dane Wittrup. Directed evolution of antibody frag-  
1078 ments with monovalent femtomolar antigen-binding affinity. *Proceedings of the National Academy  
1079 of Sciences*, 97(20):10701–10705, September 2000.
- 1080 [21] David Sloan Wilson. Complex interactions in metacommunities, with implications for biodiversity  
1081 and higher levels of selection. *Ecology*, 73(6):1984–2000, 1992.
- 1082 [22] James A Damore and Jeff Gore. Understanding microbial cooperation. *Journal of theoretical  
1083 biology*, 299:31–41, 2012.
- 1084 [23] Babak Momeni, Li Xie, and Wenying Shou. Lotka-volterra pairwise modeling fails to capture  
1085 diverse pairwise microbial interactions. *Elife*, 6, 2017.
- 1086 [24] Jeremy J. Minty, Marc E. Singer, Scott A. Scholz, Chang-Hoon Bae, Jung-Ho Ahn, Clifton E.  
1087 Foster, James C. Liao, and Xiaoxia Nina Lin. Design and characterization of synthetic fungal-  
1088 bacterial consortia for direct production of isobutanol from cellulosic biomass. *Proceedings of the  
1089 National Academy of Sciences*, 110(36):14592–14597, September 2013. 00024 PMID: 23959872.
- 1090 [25] Kang Zhou, Kangjian Qiao, Steven Edgar, and Gregory Stephanopoulos. Distributing a metabolic  
1091 pathway among a microbial consortium enhances production of natural products. *Nature biotech-  
1092 nology*, 2015.
- 1093 [26] Hyun-Dong Shin, Shara McClendon, Trinh Vo, and Rachel R. Chen. Escherichia coli Binary Culture  
1094 Engineered for Direct Fermentation of Hemicellulose to a Biofuel. *Applied and Environmental  
1095 Microbiology*, 76(24):8150–8159, December 2010. 00000.

- 1096 [27] T Mankad and HR Bungay. Model for microbial growth with more than one limiting nutrient.  
1097 *Journal of biotechnology*, 7(2):161–166, 1988.
- 1098 [28] Sattar Taheri-Araghi, Serena Bradde, John T. Sauls, Norbert S. Hill, Petra Anne Levin, Johan  
1099 Paulsson, Massimo Vergassola, and Suckjoon Jun. Cell-Size Control and Homeostasis in Bacteria.  
1100 *Current Biology*, 25(3):385–391, February 2015.
- 1101 [29] Richard E Lenski and Michael Travisano. Dynamics of adaptation and diversification: a 10,000-  
1102 generation experiment with bacterial populations. *Proceedings of the National Academy of Sci-  
1103 ences*, 91(15):6808–6814, 1994.
- 1104 [30] Adam James Waite and Wenying Shou. Adaptation to a new environment allows cooperators to  
1105 purge cheaters stochastically. *Proceedings of the National Academy of Sciences*, 109(47):19079–  
1106 19086, 2012.
- 1107 [31] Paul B Rainey and Katrina Rainey. Evolution of cooperation and conflict in experimental bacterial  
1108 populations. *Nature*, 425(6953):72, 2003.
- 1109 [32] Rafael U Ibarra, Jeremy S Edwards, and Bernhard O Palsson. *Escherichia coli* k-12 undergoes  
1110 adaptive evolution to achieve in silico predicted optimal growth. *Nature*, 420(6912):186, 2002.
- 1111 [33] Rafael Sanjuán, Andrés Moya, and Santiago F Elena. The distribution of fitness effects caused by  
1112 single-nucleotide substitutions in an rna virus. *Proceedings of the National Academy of Sciences  
1113 of the United States of America*, 101(22):8396–8401, 2004.
- 1114 [34] Karen S Sarkisyan, Dmitry A Bolotin, Margarita V Meer, Dinara R Usmanova, Alexander S Mishin,  
1115 George V Sharonov, Dmitry N Ivankov, Nina G Bozhanova, Mikhail S Baranov, Onuralp Soylemez,  
1116 et al. Local fitness landscape of the green fluorescent protein. *Nature*, 533(7603):397–401, 2016.
- 1117 [35] Dominika M Wloch, Krzysztof Szafraniec, Rhona H Borts, and Ryszard Korona. Direct estimate  
1118 of the mutation rate and the distribution of fitness effects in the yeast *saccharomyces cerevisiae*.  
1119 *Genetics*, 159(2):441–452, 2001.
- 1120 [36] Celia Payen, Anna B Sunshine, Giang T Ong, Jamie L Pogachar, Wei Zhao, and Maitreya J  
1121 Dunham. High-throughput identification of adaptive mutations in experimentally evolved yeast  
1122 populations. *PLoS genetics*, 12(10):e1006339, 2016.
- 1123 [37] Wenying Shou, Sri Ram, and Jose M. G. Vilar. Synthetic cooperation in engineered yeast pop-  
1124 ulations. *Proceedings of the National Academy of Sciences of the United States of America*,  
1125 104(6):1877–1882, February 2007. 00137.
- 1126 [38] Babak Momeni, Kristen A Brileya, Matthew W Fields, and Wenying Shou. Strong inter-population  
1127 cooperation leads to partner intermixing in microbial communities. *eLife*, 2, January 2013.
- 1128 [39] W. D. Hamilton. The genetical evolution of social behaviour I and II. *Journal of Theoretical  
1129 Biology*, 7(1):1–52, July 1964.
- 1130 [40] John Maynard Smith. Group Selection and Kin Selection. *Nature*, 201(4924):1145–1147, March  
1131 1964.
- 1132 [41] George R. Price. Selection and Covariance. *Nature*, 227(5257):520–521, August 1970. 01240.

- 1133 [42] Michael J. Wade. A Critical Review of the Models of Group Selection. *The Quarterly Review of*  
1134 *Biology*, 53(2):101–114, June 1978. ArticleType: research-article / Full publication date: Jun.,  
1135 1978 / Copyright © 1978 The University of Chicago Press.
- 1136 [43] William M Muir. Group selection for adaptation to multiple-hen cages: selection program and  
1137 direct responses. *Poultry Science*, 75(4):447–458, 1996.
- 1138 [44] David C. Queller and Joan E. Strassmann. Kin Selection and Social Insects. *BioScience*, 48(3):165–  
1139 175, March 1998.
- 1140 [45] Michael J Wade. An experimental study of kin selection. *Evolution*, pages 844–855, 1980.
- 1141 [46] Arne Traulsen and Martin A. Nowak. Evolution of cooperation by multilevel selection. *Proceedings*  
1142 *of the National Academy of Sciences*, 103(29):10952–10955, July 2006.
- 1143 [47] L. Lehmann, L. Keller, S. West, and D. Roze. Group selection and kin selection: Two concepts  
1144 but one process. *Proc Natl Acad Sci USA*, 104(16):6736–6739, April 2007.
- 1145 [48] Benjamin Kerr. Theoretical and experimental approaches to the evolution of altruism and the  
1146 levels of selection. *Experimental Evolution: Concepts, Methods, and Applications of Selection*  
1147 *Experiments*, pages 585–630, 2009. 00006.
- 1148 [49] Herwig Bachmann, Frank J Bruggeman, Douwe Molenaar, Filipe Branco dos Santos, and Bas  
1149 Teusink. Public goods and metabolic strategies. *Current Opinion in Microbiology*, 31:109–115,  
1150 June 2016. 00000.
- 1151 [50] Katrin Hammerschmidt, Caroline J. Rose, Benjamin Kerr, and Paul B. Rainey. Life cycles, fitness  
1152 decoupling and the evolution of multicellularity. *Nature*, 515(7525):75–79, November 2014.
- 1153 [51] Martin A. Nowak. Five Rules for the Evolution of Cooperation. *Science*, 314(5805):1560–1563,  
1154 December 2006.
- 1155 [52] C. J. Goodnight and L. Stevens. Experimental studies of group selection: what do they tell us  
1156 about group selection in nature? *The American Naturalist*, 150 Suppl 1:S59–79, July 1997.
- 1157 [53] George R Price. Extension of covariance selection mathematics. *Annals of human genetics*,  
1158 35(4):485–490, 1972.
- 1159 [54] Samuel Frederick Mock Hart, David Skelding, Adam J Waite, Justin Burton, Li Xie, and Wenying  
1160 Shou. Microscopy quantification of microbial birth and death dynamics. *bioRxiv*, page 324269,  
1161 2018.
- 1162 [55] Kristina L Hillesland and David A Stahl. Rapid evolution of stability and productivity at the origin  
1163 of a microbial mutualism. *Proceedings of the National Academy of Sciences*, 107(5):2124–2129,  
1164 2010.
- 1165 [56] Souichiro Kato, Shin Haruta, Zong Jun Cui, Masaharu Ishii, and Yasuo Igarashi. Effective cellulose  
1166 degradation by a mixed-culture system composed of a cellulolytic clostridium and aerobic non-  
1167 cellulolytic bacteria. *FEMS microbiology ecology*, 51(1):133–142, 2004.
- 1168 [57] Leland H Hartwell and Ted A Weinert. Checkpoints: controls that ensure the order of cell cycle  
1169 events. *Science*, 246(4930):629–634, 1989.

- 1170 [58] Danesh Moazed. Small rnas in transcriptional gene silencing and genome defence. *Nature*,  
1171 457(7228):413, 2009.
- 1172 [59] Edze R Westra, Daan C Swarts, Raymond HJ Staals, Matthijs M Jore, Stan JJ Brouns, and John  
1173 van der Oost. The crisprs, they are a-changin': how prokaryotes generate adaptive immunity.  
1174 *Annual review of genetics*, 46:311–339, 2012.
- 1175 [60] Sewall Wright. Tempo and Mode in Evolution: A Critical Review. *Ecology*, 26(4):415–419, 1945.
- 1176 [61] Michael Doebeli, Yaroslav Ispolatov, and Burt Simon. Towards a mechanistic foundation of evo-  
1177 lutionary theory. *eLife*, 6:e23804, February 2017.
- 1178 [62] Herwig Bachmann, Martin Fischlechner, Iraes Rabbers, Nakul Barfa, Filipe Branco dos Santos,  
1179 Douwe Molenaar, and Bas Teusink. Availability of public goods shapes the evolution of competing  
1180 metabolic strategies. *Proceedings of the National Academy of Sciences of the United States of*  
1181 *America*, 110(35):14302–14307, August 2013.
- 1182 [63] John S Chuang, Olivier Rivoire, and Stanislas Leibler. Simpson's paradox in a synthetic microbial  
1183 system. *Science (New York, N.Y.)*, 323(5911):272–275, January 2009.
- 1184 [64] Li Xie and Wenying Shou. Community function landscape and steady state species composition  
1185 shape the eco-evolutionary dynamics of artificial community selection. *bioRxiv*, page 264697, 2018.
- 1186 [65] C Peter Wolk, Anneliese Ernst, and Jeff Elhai. Heterocyst metabolism and development. In *The*  
1187 *molecular biology of cyanobacteria*, pages 769–823. Springer, 1994.
- 1188 [66] Samuel F. M. Hart, Hanbing Mi, Robin Green, Li Xie, Jose Mario Bello Pineda, Babak Momeni,  
1189 and Wenying Shou. Uncovering and resolving challenges of quantitative modeling in a simplified  
1190 community of interacting cells. *PLOS Biology*, 17(2):e3000135, February 2019.
- 1191 [67] John L Spudich and Daniel E Koshland Jr. Non-genetic individuality: chance in the single cell.  
1192 *Nature*, 262(5568):467, 1976.
- 1193 [68] Stephen T Chisholm, Gitta Coaker, Brad Day, and Brian J Staskawicz. Host-microbe interactions:  
1194 shaping the evolution of the plant immune response. *Cell*, 124(4):803–814, 2006.
- 1195 [69] Ruth E Ley, Micah Hamady, Catherine Lozupone, Peter J Turnbaugh, Rob Roy Ramey, J Stephen  
1196 Bircher, Michael L Schlegel, Tammy A Tucker, Mark D Schrenzel, Rob Knight, et al. Evolution  
1197 of mammals and their gut microbes. *Science*, 320(5883):1647–1651, 2008.
- 1198 [70] Kevin R Foster, Jonas Schluter, Katharine Z Coyte, and Seth Rakoff-Nahoum. The evolution of  
1199 the host microbiome as an ecosystem on a leash. *Nature*, 548(7665):43, 2017.
- 1200 [71] Sarah P Otto and Aleeza C Gerstein. Why have sex? the population genetics of sex and recom-  
1201 bination, 2006.
- 1202 [72] Didier Gonze, Leo Lahti, Jeroen Raes, and Karoline Faust. Multi-stability and the origin of microbial  
1203 community types. *The ISME journal*, 11(10):2159, 2017.
- 1204 [73] Luc De Vuyst, Raf Callewaert, and Kurt Crabbé. Primary metabolite kinetics of bacteriocin  
1205 biosynthesis by *Lactobacillus amylovorus* and evidence for stimulation of bacteriocin production  
1206 under unfavourable growth conditions. *Microbiology*, 142(4):817–827, 1996.



- 1207 [74] Melanie JI Müller, Beverly I Neugeboren, David R Nelson, and Andrew W Murray. Genetic drift  
1208 opposes mutualism during spatial population expansion. *Proceedings of the National Academy of*  
1209 *Sciences*, 111(3):1037–1042, 2014.
- 1210 [75] Thomas Egli. *Nutrition, microbial*. Oxford: Elsevier Academic Press, 2009.
- 1211 [76] Kai Zhuang, Goutham N Vemuri, and Radhakrishnan Mahadevan. Economics of membrane occu-  
1212 pancy and respiro-fermentation. *Molecular systems biology*, 7(1):500, 2011.
- 1213 [77] Joan B Peris, Paulina Davis, José M Cuevas, Miguel R Nebot, and Rafael Sanjuán. Distribution of  
1214 fitness effects caused by single-nucleotide substitutions in bacteriophage f1. *Genetics*, 185(2):603–  
1215 609, 2010.
- 1216 [78] Adrian WR Serohijos and Eugene I Shakhnovich. Merging molecular mechanism and evolution:  
1217 theory and computation at the interface of biophysics and evolutionary population genetics. *Current*  
1218 *opinion in structural biology*, 26:84–91, 2014.
- 1219 [79] Adam Eyre-Walker and Peter D Keightley. The distribution of fitness effects of new mutations.  
1220 *Nature reviews. Genetics*, 8(8):610, 2007.
- 1221 [80] Michael A Stiffler, Doeke R Hekstra, and Rama Ranganathan. Evolvability as a function of purifying  
1222 selection in tem-1  $\beta$ -lactamase. *Cell*, 160(5):882–892, 2015.
- 1223 [81] John W Drake. A constant rate of spontaneous mutation in dna-based microbes. *Proceedings of*  
1224 *the National Academy of Sciences*, 88(16):7160–7164, 1991.
- 1225 [82] Gregory I. Lang and Andrew W. Murray. Estimating the Per-Base-Pair Mutation Rate in the Yeast  
1226 *Saccharomyces cerevisiae*. *Genetics*, 178(1):67–82, January 2008.
- 1227 [83] Sasha F Levy, Jamie R Blundell, Sandeep Venkataram, Dmitri A Petrov, Daniel S Fisher, and  
1228 Gavin Sherlock. Quantitative evolutionary dynamics using high-resolution lineage tracking. *Nature*,  
1229 519(7542):181, 2015.
- 1230 [84] Clifford Zeyl and J Arjan GM DeVisser. Estimates of the rate and distribution of fitness effects of  
1231 spontaneous mutation in *saccharomyces cerevisiae*. *Genetics*, 157(1):53–61, 2001.
- 1232 [85] Jeffrey E Barrick, Dong Su Yu, Sung Ho Yoon, Haeyoung Jeong, Tae Kwang Oh, Dominique  
1233 Schneider, Richard E Lenski, and Jihyun F Kim. Genome evolution and adaptation in a long-term  
1234 experiment with *escherichia coli*. *Nature*, 461(7268):1243, 2009.
- 1235 [86] Toon Swings, Bram Van den Bergh, Sander Wuyts, Eline Oeyen, Karin Voordeckers, Kevin J  
1236 Verstrepen, Maarten Fauvart, Natalie Verstraeten, and Jan Michiels. Adaptive tuning of mutation  
1237 rates allows fast response to lethal stress in *escherichia coli*. *eLife*, 6(22939), 2017.
- 1238 [87] Lília Perfeito, Lisete Fernandes, Catarina Mota, and Isabel Gordo. Adaptive mutations in bacteria:  
1239 high rate and small effects. *Science*, 317(5839):813–815, 2007.
- 1240 [88] John H Gillespie. Molecular evolution over the mutational landscape. *Evolution*, 38(5):1116–1129,  
1241 1984.
- 1242 [89] H Allen Orr. The distribution of fitness effects among beneficial mutations. *Genetics*, 163(4):1519–  
1243 1526, 2003.

- 1244 [90] Marianne Imhof and Christian Schlötterer. Fitness effects of advantageous mutations in evolving  
1245 *Escherichia coli* populations. *Proceedings of the National Academy of Sciences*, 98(3):1113–1117,  
1246 2001.
- 1247 [91] Rees Kassen and Thomas Bataillon. Distribution of fitness effects among beneficial mutations  
1248 before selection in experimental populations of bacteria. *Nature genetics*, 38(4):484, 2006.
- 1249 [92] Darin R Rokyta, Paul Joyce, S Brian Caudle, and Holly A Wichman. An empirical test of the  
1250 mutational landscape model of adaptation using a single-stranded dna virus. *Nature genetics*,  
1251 37(4):441, 2005.
- 1252 [93] Darin R Rokyta, Craig J Beisel, Paul Joyce, Martin T Ferris, Christina L Burch, and Holly A  
1253 Wichman. Beneficial fitness effects are not exponential for two viruses. *Journal of molecular  
1254 evolution*, 67(4):368, 2008.
- 1255 [94] Michael J Wisser, Noah Ribeck, and Richard E Lenski. Long-term dynamics of adaptation in asexual  
1256 populations. *Science*, 342(6164):1364–1367, 2013.
- 1257 [95] Lukasz Jasnos and Ryszard Korona. Epistatic buffering of fitness loss in yeast double deletion  
1258 strains. *Nature genetics*, 39(4):550, 2007.
- 1259 [96] Rafael Sanjuán, Andrés Moya, and Santiago F Elena. The contribution of epistasis to the archi-  
1260 tecture of fitness in an rna virus. *Proceedings of the National Academy of Sciences of the United  
1261 States of America*, 101(43):15376–15379, 2004.
- 1262 [97] Aisha I Khan, Duy M Dinh, Dominique Schneider, Richard E Lenski, and Tim F Cooper.  
1263 Negative epistasis between beneficial mutations in an evolving bacterial population. *Science*,  
1264 332(6034):1193–1196, 2011.
- 1265 [98] Santiago F Elena and Richard E Lenski. Test of synergistic interactions among deleterious muta-  
1266 tions in bacteria. *Nature*, 390(6658):395, 1997.
- 1267 [99] Carlos L Araya, Douglas M Fowler, Wentao Chen, Ike Muniez, Jeffery W Kelly, and Stanley Fields.  
1268 A fundamental protein property, thermodynamic stability, revealed solely from large-scale mea-  
1269 surements of protein function. *Proceedings of the National Academy of Sciences*, 109(42):16858–  
1270 16863, 2012.
- 1271 [100] Hsin-Hung Chou, Hsuan-Chao Chiu, Nigel F Delaney, Daniel Segrè, and Christopher J Marx.  
1272 Diminishing returns epistasis among beneficial mutations decelerates adaptation. *Science*,  
1273 332(6034):1190–1192, 2011.
- 1274 [101] Sergey Kryazhimskiy, Daniel P Rice, Elizabeth R Jerison, and Michael M Desai. Global epistasis  
1275 makes adaptation predictable despite sequence-level stochasticity. *Science*, 344(6191):1519–1522,  
1276 2014.
- 1277 [102] G. W. Luli and W. R. Strohl. Comparison of growth, acetate production, and acetate inhibition  
1278 of *Escherichia coli* strains in batch and fed-batch fermentations. *Applied and Environmental  
1279 Microbiology*, 56(4):1004–1011, April 1990.
- 1280 [103] Wenying Shou. Acknowledging selection at sub-organismal levels resolves controversy on pro-  
1281 cooperation mechanisms. *eLife*, page e10106, December 2015.

- 1282 [104] R C Lewontin. The Units of Selection. *Annual Review of Ecology and Systematics*, 1(1):1–18,  
1283 1970.
- 1284 [105] William G Hill and Armando Caballero. Artificial selection experiments. *Annual Review of Ecology  
1285 and Systematics*, 23(1):287–310, 1992.
- 1286 [106] Alan Robertson. Artificial selection in plants and animals. *Proc. R. Soc. Lond. B*, 164(995):341–  
1287 349, 1966.
